# Supplementary material for: Molecular basis for dyneinopathies reveals insight into dynein regulation and dysfunction
Source: eLife. 2019 Jul 31;8:e47246. doi: 10.7554/eLife.47246 (PMC6733598; doi:10.7554/eLife.47246)
Supplement: Figure 1—source data 1. [file elife-47246-fig1-data1.xlsx]

## Sheet: spindle positioning data
GENOTYPE	mispositioned (n1)	mispositioned (n2)	mispositioned (n3)	total (n1)	total (n2)	total (n3)	total N	Total mispositioned	% mispositioned (weighted means)	weighted SEP	Z score	p value from Z score
WT	0	0	1	39	66	81	186	1	0.00537634	0.00534305	-
dyn1∆	39	28	47	62	50	94	206	114	0.553398	0.0590355	11.8999	< 0.0001
E109I	0	1	2	55	48	54	157	3	0.0191083	0.0151421	1.1802	0.237921
L213I	2	0	0	80	70	66	216	2	0.00925926	0.00646493	0.451032	0.651989
R241L	0	2	0	30	36	42	108	2	0.0185185	0.0127256	1.08094	0.279742
N283R	0	1	1	36	31	33	100	2	0.02	0.0196847	1.15755	0.247027
K540C	0	0	0	80	44	66	190	0	0	0	-1.01204	0.311538
E545V	3	0	0	60	38	44	142	3	0.0211268	0.0118887	1.28774	0.19785
I554M	0	0	2	36	33	47	116	2	0.0172414	0.0119293	1.01126	0.311873
W612C	3	2	0	102	88	78	268	5	0.0186567	0.0115837	1.21856	0.222996
K1475Q	5	5	2	55	120	75	250	12	0.048	0.0228649	2.58809	0.0096507
R1852C	9	6	3	107	117	30	254	18	0.0708661	0.0271657	3.33853	0.0008423
D2439K	0	0	0	86	50	46	182	s	0	0	-0.990536	0.32193
R2543K	2	0	1	31	35	33	99	3	0.030303	0.0237633	1.70325	0.0442653
L2557M	3	3	5	128	57	111	296	11	0.0371622	0.0188602	2.18032	0.0292352
R3152N	3	2	3	67	76	119	262	8	0.0305344	0.0183145	1.87012	0.0614699
K3160Q	1	8	1	86	118	45	249	10	0.0401606	0.0189312	2.28615	0.0222425
R3201N	1	3	0	53	42	49	144	4	0.0277778	0.0184692	1.65213	0.0985142
H3639P	38	33	112	65	77	197	339	183	0.539823	0.0450356	12.2759	< 0.0001
loop mutants
H3639S	0	2	0	31	32	48	111	2	0.018018	0.0123361	1.05406	0.291837
H3639V	1	3	0	64	35	87	186	4	0.0215054	0.0142382	1.35075	0.176792
H3639N	0	0	-	42	65	-	107	0	0	0	-0.759762	0.447374
W3640P	2	0	1	35	30	30	95	3	0.0315789	0.0248043	1.75407	0.0794192
F3641P	56	54	55	78	73	110	261	165	0.632184	0.0496831	13.5194	< 0.0001
Y3642P	1	1	-	30	37	-	67	2	0.0298507	0.0293968	1.58685	0.112547
G3643P	0	0	-	45	31	-	76	0	0	0	-0.640443	0.521884
I3644P	1	3	-	44	67	-	111	4	0.036036	0.0241568	1.98695	0.0469276
3639P 3640G	38	47	-	46	51	-	97	85	0.876289	0.0462959	15.1192	< 0.0001
3638G 3639P	37	49	-	45	66	-	111	86	0.774775	0.0551113	14.0954	< 0.0001
3638G 3639P 3640G	17	13	11	50	52	54	156	41	0.262821	0.0604598	7.22486	< 0.0001
