# Supplementary material for: Molecular basis for dyneinopathies reveals insight into dynein regulation and dysfunction
Source: eLife. 2019 Jul 31;8:e47246. doi: 10.7554/eLife.47246 (PMC6733598; doi:10.7554/eLife.47246)
Supplement: Figure 2—source data 1. [file elife-47246-fig2-data1.xlsx]

## Sheet: spindle vel (nm per s)
wild-type	E109I	L213I	R241L	N283R	K540C	E545V	I554M	W612C	K1475Q	R1852C	D2439K	R2543K	L2557M	R3152N	K3160Q	R3201N	H3639P
80.8175	56.1365	75.1502	15.7078	37.7115	91.415	87.7877	48.4695	78.8452	70.9946	31.954	63.7623	5.18557	90.4	34.4843	22.144	18.7927	25.3074
65.7644	48.0602	61.0995	18.347	29.1189	79.7453	85	35.3914	72.723	66.5365	21.2058	26.2278	11.4073	76.7	33.7262	8.58496	11.4939	23.3124
66.6682	65.9896	57.5172	25.9701	51.2431	79.6216	83.4	38.673	64.6209	64.9922	13.6469	39.9875	31.0648	73.8	36.4402	50.2702	17.6826	21.6095
48.194	73.6827	51.7965	55.5282	32.4512	78.0064	79.4556	40.2966	61.0061	62.2785	29.2313	54.1563	35.1188	70	39.5467	46.2215	30.9596	29.6904
53.6435	83.4914	50.6858	19.8417	50.0349	75.1042	78	16.6771	60.9296	60.0314	18.9068	38.9507	16.4478	66.4	57.033	31.4569	35.3039	33.0774
41	56.7484	50.3051	24.3368	62.2276	74.7575	71.8517	27.3031	59.7526	58.615	20.4513	46.3518	19.7842	63.9395	35.2113	53.3522	26.3736	25.3956
42.375	73.0603	49.8373	20.3573	31.6458	73.0176	68.0193	31.6529	58.3124	55.7285	13.8081	29.2163	9.12141	63.6669	45.418	31.9106	31.2956	11.0815
66.7637	73.4003	49.5108	22.7783	44.9728	71.6344	67.5	20.3567	57.6618	53.1011	13.1759	56.5565	25.1972	61.9	41.262	20.5023	26.7838	25.9
39.23	71.4493	48.2631	16.2986	30.2039	68.6566	64.7635	48.2032	57.4708	52.2481	48.4663	46.7769	27.9749	61.7126	67.5965	17.8916	13.7353	14.55
42.2956	55.5554	47.7592	34.0102	21.1355	68.0397	58.888	16.465	54.6548	52.1491	31.1709	34.3649	21.643	59.5563	39.5603	39.6298	20.1246	14.5
92.5224	54.7083	46.788	22.7927	37.4623	67.1236	58.6848	25.2317	53.0965	50.7003	16.5872	30.317	13.4797	58.0252	53.4981	58.9392	45.8869
45.0518	44.8987	46.2612	39.819	33.9778	66.4955	56	25.5905	52.8975	50.125	8.70621	49.2432	14.2927	56.8519	32.0414	38.1191	29.9792
50.7927	70.0724	45.9648	68.5126	27.2606	64.5016	55.3625	40.4547	52.0515	49.4543	13.0158	60	13.52	56.0239	29.1797	21.5869	34.0228
41.6206	65.4212	45.8105	58.8472	18.3724	63.3758	55.345	42.1706	51.0919	48.6892	9.43554	58.4626	22.9952	54.9	36.4178	25.2579	26.21
80.0932	52.379	44.5845	31.382	19.7922	62.0348	53	48.5145	50.1853	47.1758	15.8946	46.312	16.5846	54.804	48.1898	34.6781	36.4821
50.3599	74.753	44.1989	23.5978	44.481	61.0393	53	38.3919	49.684	46.9531	15.9849	36.4221	22.9866	51.7797	48.089	36.3437	22.2688
62.4995	71.787	43.6181	57.6105	41.3032	60.772	52	28.2637	49.5	45.5982	20.9306	36.2707	16.2824	51.2283	35.7072	33.1701	21.3733
30.468	95.3033	43.3416	31.1368	59.0406	59.7875	51.9412	42.1967	49.0833	45.3977	10.7565	39.4955	17.6192	50.526	42.9253	17.8215	16.2271
36.5568	54	41.4667	38.0421	20.944	59.1797	50.7306	46.5693	48.6433	44.6792	16.9348	45.1505	16.1358	50.4966	41.5406	60.8684	21.8949
36.1956	38.0053	41.3354	33.3728	68.4008	59.1052	50.4047	26.9932	48.2945	42.1777	40.4994	30.0551	44.8091	49.5	30.6674	13.7839	14.4995
43.5547	120.969	41.2433	14.1778	39.697	58.1481	49.8028	20.7062	47.8916	41.5216	10.2707	25.4407	13.6648	49.4456	40.0345	21.6437	23.5
34.0876	39.5188	41.0301	32.1464	33.4324	57.1733	48.5825	37.3741	46.435	40.0014	15.8885	35.5783	15.8195	49.4	23.5979	23.513	42.0634
21.0412	75.305	40.5627	30.8071	48.5364	57.1185	48	15.9667	46.1243	38.9501	13.082	44.3998	17.3917	48.9	58.7703	25.94	18.7503
83.707	55.9465	40.528	44.3679	23.0249	56.4521	47.5	55.7247	42.1207	38.8743	35.5349	55.2304	26.139	47	38.7123	17.7644	17.0034
81.267	55.4722	40.527	27.9136	26.2955	56.1182	47.3112	37.4124	41.9404	38.7971	15.7566	22.9571	23.575	46.2	28.972	19.5785	33.2846
51.8587	50.6077	40.3518	36.1005	18.8631	55.6686	46.7235	31.9634	40.5667	38.3611	53.4019	39.1886	13.301	45.1078	38.291	39.9005	24.4648
51.481	57.2911	39.141	111.485	41.1819	53.6787	46	34.2918	40.4871	38.0361	48	19.701	40.7063	45.0087	55.73	29.0111	11.3102
50.5958	82.8496	38.4653	17.1977	60.9924	53.2912	46	75.67	40.4304	37.8063	38	45.7783	16.6412	44.0931	36.6913	60.3452	16.6681
29.9957	54.0812	37.3663	32.1519	50.9671	52.629	44.5203	33.4101	39.9852	36.4086	46.4673	30.6413	15.096	43.2	33.9438	36.3231	44.0794
49.4203	51.6022	37.1258	55.0761	25.4341	52.5568	44.2315	32.2222	39.8018	36.0605	35.4377	60.171	15.2118	43.2	48.9885	33.0905	42.6241
44.569	35.551	37.0416	15.7882	34.3794	52.512	44	19.8192	39	35.5243	31.3881	54.2049	11.4093	43.1	31.2113	31.3783	32.0109
40.0444	45.8045	36.794	25.8951	44.6376	52.3481	44	51.1324	38.9314	35.4353	29.105	21.4557	8.63235	42.9	23.0794	9.92217	30.0011
58.024	65.933	36.517	40.2963	16.1169	52.2721	43.6162	36.8627	38.0553	35.3657	28.256	52.5993	16.8764	42.9	30.7343	26.5546	39.0816
57.7321	42.823	36.4243	30.821	29.0611	51.4576	42.2271	39.9144	36.5	35.2068	27.3927	33.4105	6.28849	42.1092	45.6358	25.7113	18.8938
55.7105	63.6361	33.9033	24.7862	23.8565	50.7671	42.2	17.3595	35.1266	34.7616	27.2684	31.1837	16.5625	41.5029	43.702	13.5465	29.0849
36.8448	38.9491	33.8442	48.7836	26.5654	49.9367	42.1385	43.1679	34.998	34.7337	26.9129	30.8322	10.7363	41.1102	28.3981	25.602	24.7915
25.4828	38.03	33.2189	35.0299	32.9668	49.387	41.7581	41.9354	34.5785	34.588	24.903	30.2366	15.6264	41.0075	20.7258	10.8567	16.9635
33.8184	37	32.5678	24.7242	28.9547	48.9189	40	33.6755	34.0645	34.2929	24.3271	43.9945	18.1075	40.2979	26.9976	21.5433	36.8367
48.9625	36.8217	32.5589	34.0622	45.4976	48.2473	40	37.8203	33.995	34.1706	23.1311	39.2469	18.9163	39.1384	15.9157	25.3185	52.2164
31.5749	54.3491	32.2854	37.262	14.2192	48.1014	39.8303	19.7451	33.9826	33.6222	22.0562	38.0885	25.9425	39.0511	19.643	33.4958	10.4485
46.908	53.6342	32.2778	19.4378	14.3552	47.8293	39.3	65.1186	33.6584	33.4871	21.258	37.2097	13.652	38.45	75.8038	23.5701	36.6313
44.2775	35.6397	31.5925	42.6408	14.0365	47.082	39.1123	14.8953	33.1183	32.6529	18.5391	24.58	15.0372	38.2778	23.7198	46.1648	30.3433
86.6531	51.6142	30.9402	26.6402	15.9554	46.8077	39	32.2348	32.223	32.5171	18.4349	35.2575	25.0805	38.2778	34.6623	10.9253	51.382
20.8745	47.5738	30.915	48.8189	44.8702	46.6301	36.9946	48.7999	31.0089	32.4538	18.4019	34.7098	17.4902	38.1982	22.9163	35.2637	32.5715
20.5929	46.8156	30.6482	41.0399	35.2971	45.4859	36.9498	30.2012	30.8498	31.3865	17.4349	69.1624	16.3806	38.0831	21.7842	24.8523	39.4639
79.4028	93.3875	30.6165	29.6331	43.6606	45.2893	36.9288	27	30.5	31.2607	17.2376	22.8524	16.5802	37.3853	31.5032	21.5163	13.8225
26.2078	46.4487	30.5717	40.2106	25.0014	45.1345	36.9208	31.6439	29.2264	31.2571	16	68.1809	30.7123	36.2076	31.4608	19	25.6027
38.2361	45.9848	29.9975	63.7368	25.5138	45.1315	35.4068	40.4935	29.0499	31.1404	14.6423	21.8595	10.7225	36.1217	31.1962	21.8311	34.5002
25.4185	18.2309	29.8644	35.5245	25.0563	44.776	35	37.6536	28.9676	30.7896	13.8601	32.116	19.2662	35.4	30.8616	49.0611	22.2438
69.8698	45	29.834	44.6634	38.1697	42.8841	34.5066	64.0593	28.4611	30.4254	13.4864	63.4031	17.5153	34.7	20.2789	47.096	46.5254
33.8151	77	29.2223	33.3754	28.6127	42.6078	34.1902	42.9533	27.6051	30.3445	13.0619	60.546	17.6562	34.7	29.4725	30.9093	37.7787
22.4456	76	29.1493	39.313	29.824	42.0032	34.0206	26.2771	27.0514	29.8952	13	19.2319	39.7669	34	29.381	25.0932	28.4086
67.0916	71	29.0799	58.2048	15.615	41.8825	32.1	48.2323	27.0187	29.7437	12.1237	28.2029	20.2271	33.7	29.1784	34.5985	102.452
65.2292	22.8618	28.7135	34.4284	59.9087	40.72	31.7861	38.6226	26.9868	29.1125	11.8471	27.9635	10.6512	33.5201	28.377	18.0868	55.5784
18.6819	21.8889	28.7002	22.4901	21.9471	40.5131	31.1267	27.5191	26.1603	27.9593	8.2022	51.8578	24.5362	33.323	26.9278	22.3509	24.8251
55.9931	32.0708	28.6355	30.9774	18.2848	40.3304	30.6501	30.8481	25.7966	27.7058	7	50.785	36.0823	33.2989	51.8131	52.3564	45.4547
55.6128	31.2985	28.0336	34.7406	25.2361	40.2484	30	30.8133	25.4022	27.5808	50	24.3215	15.4496	33.1131	50.4434	48.6832	13.7353
55.1242	30.8612	28.0017	43.4276	20.4219	39.7734	29.3375	25.5046	25.1921	27.0333	40	46.8668	12.8619	32.3467	49.5708	30.3853	32.5715
51.1711	58	27.7179	11.738	27.8489	39.7688	28.6039	39.0491	24.8996	26.9445	39	43.7927	30.4713	32.1	24.4495	15.7726	34.3913
50.1005	28.761	27.6688	19.7124	25.7692	39.5828	28.0857	52.2581	24.5348	26.7092	36	14.2732	12.4307	32.1	24.203	41.0868	10.5892
48.2137	56	27.478	18.8114	31.0098	38.8296	28.0703	18.4269	24.5187	26.6928	34	40.5836	26.7712	31.5	46.2033	33.6994	25.6027
23.8889	53	26.205	30.1528	30.8782	38.1883	27.6638	44.6226	23.638	26.6093	30	39.3236	16.5224	31	45.4121	10.9253	31.0317
47.0125	25.0818	25.7489	17.007	41.1099	37.5603	27.5297	45.5862	23.2137	26.4267	30	34.4453	12.3678	30.4	45.0568	20.1202	27.4742
46.2254	50	25.5093	21.4061	31.6068	37.2404	26.6149	36.7804	22.7769	26.3844	29.2367	30.147	24.9943	30.265	45	26.4925	39.9969
46.1325	50	25.4595	30.613	29.7835	37.0921	26.0912	52.0257	22.7319	26.1079	26.3883	27.406	19.1589	29.833	44.5076	27.9291	25.851
23.0186	24.7118	25.3201	21.1603	34.9411	36.1406	25	32.302	22.4548	25.9891	24.4452	22.6534	20.6667	29.6	41.9274	12.9806	17.4009
22.7561	16.0548	25.1413	14.1113	34.5745	35.5635	23.0765	26.2292	20.9913	24.964	24.035	20.9382	28.6793	29.2445	41.6918	46.2388	35.9587
22.1936	41	25.0708	20.1029	29.6267	35.5274	23	27.9377	20.8058	24.6128	24	18.9371	16.5224	29.2243	20.3947	30.5127	17.4146
37.1421	12.4659	23.301	33.866	28.5143	35.2866	23	79.0667	20.2695	24.4468	23.1971	15.7537	26.7712	28.5863	34.8186	33.5092	21.4697
35.679	36	23.1698	42.5138	28.1376	35.2439	22.6332	22.2673	19.9843	24.1426	23	6.73563	12.3678	28.5863	31.2126	35.7428	59.35
27.9245	35	23.0622	43.9169	44.4715	35.2227	22.4924	33.7761	19.5708	23.7506	22	34.5666	25.6937	28.5784	30.2653	97.4292	17.6852
9.30681	34	22.2656	24.3283	30.4977	34.974	21.0788	26.7922	19.396	23.5247	20.7	50.7231	22.1298	28.5433	15.0352	29.4403	26.6362
24.5185	33	22.1836	33.7262	25.0444	34.9085	20.367	12.9	19.1103	22.655	20.3422	40.0472	24.0085	27.9605	29.9761	39.0157	12.1442
23.7197	32	21.9072	33.3222	36.1089	34.6833	19	34.1144	18.9442	22.5504	18.5222	56.9199	18.4069	26.3271	14.5511	25.4572	8.25418
16.97	10.8972	20.521	23.7962	37.5512	34.2708	19	32.6074	17.7821	22.0657	18	37.4692	18.6396	26.0064	28.7275	18.4717	18.447
14.4715	14.5954	20.4191	38.2472	28.2155	34.1583	17.3855	20.9418	17.515	21.844	17.8643	28.7802	30.7205	25.9922	26.3973	35.3876	35.427
8.01616	13	20.0736	38.7483	44.9792	33.4897	16.6774	20.0693	17.4238	21.8353	17.0916	42.9272	26.6956	24.8736	22.8017	30.1706	54.5978
5.5662	41.4174	19.9857	19.3635	35.6933	32.694	15	26.465	16.9146	21.3976	16.1254	36.3009	15.9306	24.4166	22.5557	35.9	6.10659
22.933	44.7552	19.6658	21.2316	49.5455	32.3972	14.1236	47.9717	15.0761	21.2257	15	39.5929	22.6299	24.4166	21.9234	26.7082	36.6313
39.5474	75.5952	19.4251	24.2594	51.8696	31.7784	12	50.0455	54.2117	21.1266	14	25.4931	31.148	24.3043	21.1847	50.3012	30.5446
47.8638	50.0902	19.4114	27.9688	47.3224	30.9743	9	18.0615	24.5854	21.0735	13.0953	37.149	18.8033	22.9	20.9697	20.5445	27.0877
60.5607	62.4264	19.3774	44.8562	51.109	30.762	6	36.0285	22.7335	20.6234	13	41.9863	28.9101	22.3	20.1938	35.7775	9.98991
68.1536	43.2112	19.2226	30.6999	37.023	29.8762	81.5101	34.4162	44.733	20.586	12.7152	33.3211	20.9923	21.6	19.0813	31.128	10.5824
52.8178	64.1556	18.6123	27.2133	31.9945	29.8353	76	53.6424	42.6169	20.5783	12.6749	28.0151	8.46421	19.8864	10.9287	13.519	17.9069
52.3054	48.5444	17.954	40.7871	33.7412	29.7812	70	43.2096	32.7661	19.9116	11.8498	39.2076	28.9093	19.8	9.38074	29.0437	47.3764
36.5716	37.8227	17.6244	39.8657	34.7967	29.3983	68	29.9878	36.0475	19.9097	11.4664	26.8651	19.3441	19.8	9.36909	24.1408	32.6626
50.1146	47.4391	17.2465	78.2089	21.7026	27.7092	59.0433	73.3773	24.6521	19.8668	11.2991	58.8215	18.676	18.7	8.73699	46.5154	47.5851
83.3015	65.0521	17.1263	33.9838	34.4782	27.2675	57.9482	22.19	18.6369	19.4022	11	33.7943	45.1463	18.3735	39.1277	32.2185	40.6822
69.0975	46.2157	17.0165	30.8311	24.9878	26.9252	57.6213	63.8988	43.4843	19.3883	10.0337	41.5917	37.5531	17.2014	41.5918	58.3528	23.0786
50.2837	35.8122	15.6335	18.6686	37.2879	26.3109	52	26.0933	22.3362	19.1728	7.61573	27.5101	14.3054	16.7199	34.7318	98.1705	76.4209
21.6127	39.2699	15.35	36.0136	30.8282	26.0636	49.4558	16.429	7.74805	18.8807	7.51525	40.8067	26.3949	16.3	47.9847	36.5949	27.0152
48.8344	48.6728	14.1375	37.7627	37.461	25.2227	48.0627	30.5269	42.3613	17.8973	6	39.423	12.0853	16.0508	46.8992	24.0883	41.8892
39.5252	47.5271	14.0445	34.0128	17.6369	25.084	47.7449	21.1409	19.7697	17.4753	5.14808	31.5253	9.83605	15.4173	36.3584	30.5724	40.4979
41.6721	56.1289	13.6051	20.7772	57.3167	24.5775	47	32.0258	47.5644	16.4612		38.7152	16.7131	15.2	35.3979	30.6026	28.9992
45.1481	53.6765	12.5264	13.6243	20.1648	23.8128	45	22.0489	36.2568	15.4197		29.8567	9.87418	14.5519	34.4718	27.0311	49.0537
48.9245	45.0225	12.4585	29.4951	24.4856	21.4855	45	19.6729	31.6829	11.6639		49.2025	15.8941	10.9763	29.4246	23.9263	25.6545
55.416	33.2084	11.8286	23.9246	47.523	17.5342	43.7271	49.8446	27.8903	26.828		47.3937	27.1008	37.9752	34.0603	37.8709	17.2486
55.067	62.5052	11.7409	32.0427	23.0117	64.05	43.2486	13.7328	26.924	24.5496		45.0119	28.0661	150	67.2923	43.75	26.093
47.8964	60.2984	11.6674	73.8335	28.9368	58.3487	41	25.2866	16.8356	15.9227		44.9776	32.3289	124	40.2966	40.6794	18.7235
47.075	52.3274	8.90999	35.2185	33.9205	56.7253	40.6058	26.3629	16.3244	21.7824		63.9496	20.9106	109	48.5345	32.9727	52.8761
40.423	52.1233	8.74285	49.6803	17.546	80.0796	40.5077	32.3681	27.3166	16.8529		31.7184	14.4726	97.4968	23.553	39.2376	2.51642
79.6864	64.6651	7.7733	10.8857	15.0717	105.219	39.8352	35.4579	28.9936	29.7615		62.289	18.176	88.829	35.2838	50.3841	36.9145
28.6306	64.4502	68.2292	34.9961	60.9	62.249	32.679	30.5463	56.2865	20.3488		23.4294	21.3163	86.6891	34.294	15.5756	60.9395
23.6349	27.4009	66.9681	49.4923	56.0832	36.3451	31.3938	43.7065	73.573	35.7915		38.7052	16.014	84.9682	34.1981	25.3875	47.2059
44.4132	31.1743	66.8632	41.5481	30.1033	72.5703	30	11.8569	34.2791	20.2735		22.5878	10.1887	84.4896	51.5122	27.5102	34.7917
65.2343	45.2308	65.3735	38.4729	36.3913	41.8853	27.6702	26.15	35.8866	39.4999		36.6844	8.30403	79.7718	42.4564	38.5272	29.7561
40.6573	29.2635	64.9244	54.1446	40.116	64.6663	27	77.0144	50.1737	32.3884		24.6729	6.14266	79.2214	63.2462	78.0248	44.2275
36.1813	34.0434	60.8344	9.35657	66.0709	51.0039	26.4691	54.266	79.4197	23.4805		49.0973	13.9468	77.9868	29.4707	22.1394	50.3632
23.097	41.8257	59.7429	16.4198	56.0949	46.2065	24	19.0319	43.9646	39.5733		18.7569	4.33183	77.4661	27.5936	43.1446	50.2213
20.832	32.8558	56.867	22.2412	30.982	52.1709	22.7839	70.5358	42.132	23.0285		18.436	13.1154	74	21.6662	23.7938	39.5592
34.2068	54.6018	55.2025	26.8429	17.9782	48.9214	18.7696	50.283	9.50705	33.3598		46.0678	20.3633	73.9825	34.4023	29.9499	31.2708
60.5461	40.3168	54.6339	35.3312	21.6583	51.8709	17.0099	77.9645	32.3997	29.1112		30.6712	31.2986	72.2341	34.2896	28.537	44.3477
50.7861	26.8731	52.6464	32.2087	39.2668	41.5344	14.855	38.5818	26.5908	24.4979		22.2998	14.7159	71.7667	51.4052	30.2936	42.2578
57.9196	77.8736	50.7919	30.9932	64.5881	33.0547	11	42.6436	20.1528	40.8905		44.2902	27.2916	71.5831	34.1941	29.3376	22.6627
16.7859	29.8571	50.5601	29.8728	76.7667	45.5242	55.147	47.8461	33.5965	23.485		85.7652	39.6976	70.8157	20.0289	27.1658	51.1977
45.3263	36.8199	49.408	21.0873	48.9276	44.1801	31.4954	49.074	29.6018	59.8553		21.2678	16.403	70.1915	49.5215	24.555	43.2181
41.7794	36.137	49.1158	8.9871	33.8013	70.6709	33.2217	38.8992	10.243	69.5311		42.291	25.1937	70.1053	24.634	17.4912	42.9525
26.4234	69.7112	48.8677	36.8386	26.9622	42.3097	26.4515	24.2398	35.5189	25.8499		41.9989	10.5026	70.0026	30.866	18.7158	42.6177
106.688	44.2434	48.5821	47.7256	42.2569	40.8368	27.0539	25.0572	35.1382	29.3822		40.5292	48.2747	68.8242	22.9636	27.4488	42.6037
52.6387	31.757	48.0055	52.3044	33.038	33.5493	33.9601	43.038	26.0448	26.9237		39.5662	14.9107	68.7408	30.6373	31.8895	30.4219
42.4547	40.9114	47.8967	73.03	26.8458	39.1562	52.0396	73.7067	51.4	22.1097		24.1405	12.9447	67.0118	45.0287	21.6417	24.0555
49.1736	40.8495	47.6022	30.2818	44.0275	23.9213	41.5593	80.6355	28.4691	21.1315		18.061	44.9779	66	22.2561	13.8876	114.329
33.1301	39.7494	47.5101	35.548	29.7283	36.524	45.7965	22.4284	40.5807	23.9338		18.0455	15.107	64.5738	89	22.7433	28.0036
42.3304	39.4287	47.2175	34.7308	46.8792	83.7655	35.314	29.8982	39.107	39.4826		17.4845	16.3996	63	26.5399	46.1242	52.4144
25.4406	38.2669	46.3959	48.2489	18.7613	82.8066	43.9077	22.6433	25.1547	43.59		34.7723	17.2132	61.7148	26.4903	28.6352	26.1783
43.4248	27.8534	46.0701	21.5365	70.3501	41.2953	28.8267	27.9911	44.1216	22.8063		34.7644	24.3682	61.0048	39	26.6807	20.8779
45.605	27.7209	45.7447	37.2825	38.5966	41.2251	21.6243	35.9807	36.5228	41.5389		22.9279	13.4965	61	19.6431	43.4238	51.4022
32.6657	34.502	44.3554	41.9205	45.9281	54.145	47.8689	58.2805	10.4051	35.6764		30.7714	14.4787	59.4834	78	18.9858	23.6864
21.9735	25.0582	43.2185	57.2618	38.0439	31.5869	69.4983	35.3428	29.1899	27.4473		30.4136	28.6358	59.0523	18.6279	16.2808	45.8673
32.0026	31.1475	42.9219	24.3346	22.7	52.2418	30.6242	61.2875	30.6442	10.1138		29.6842	29.2023	58.7668	18.4537	26.4558	29.8265
29.9607	28.2137	42.8266	20.3659	21.2621	30.6129	60.5086	46.2067	14.5272	22.5678		28.8405		58.4764	24.479	16.5999	42.5605
61.1418	26.8837	42.7769	44.6785	39	36.6744	23.6588	52.0074	13.6026	37.7399		28.6623		55.9377	35.8789	21.4118	27.7911
43.2529	40.275	42.7769	48.1481	18.6842	36.1715	22.8134	77.3013	30.6033	48.4771		53.0893		55	14.311	19.0555	26.6482
56.743	26.2315	42.1107	13.9547	25.9583	71.5903	27.2023	41.5364	19.4872	43.4508		24.6644		54.7557	35.4765	17.7554	19.9161
37.7686	25.2503	41.6969	35.9866	45.8693	34.6442	53.8765	32.0967	65.3138	28.9992		24.2314		53.8919	35.1581	52.5246	38.8742
17.851	37.706	41.0361	21.2943	23.2547	27.6068	34.0592	52.9058	36.0911	22.5349		23.7663		53.8114	22.039	17.1482	38.7921
38.7896	37.254	40.9325	46.0602	52.8512	41.0765	23.7902	39.292	24.3965	26.4879		46.5681		53.4921	32.7077	26.8254	25.1675
71.0241	16.8632	40.0963	27.3168	37.9861	60.7555	94	32.6391	67.6018	37.6303		14.8666		52.9978	30.8326	21.4707	36.7749
52.1604	22.322	39.2921	16.3729	29.9567	40.4776	46.4045	40.0266	32.1929	17.8774		14.5368		52.5381	61.1	25.7684	35.9248
58.3903	31.9131	37.7796	9.44689	15.7968	30.0234	45.7545	47.7444	24.2939	15.7877		21.5025		52.2682	30.2131	38.7083	35.2246
14.4776	31.3082	37.7346	15.3807	65.0977	29.7414	86	30.6527	16.8856	22.3717		17.8774		51.9835	57.6872	18.5241	69.3739
43.7827	59	37.3236	11.3639	23.7337	38.7991	83	30.5646	26.6306	20.0655		32.1848		48.2566	57	36.0197	34.6723
24.7673	29.1623	36.5705	35.9406	13.9324	28.8918	38.1135	36.5715	36.6351	40.3555		29.8647		47.5	18.1711	22.2842	33.524
75.1948	55	35.6322	36.646	53.9354	38.2659	75	43.8513	34.7971	29.5156		14.5143		46.5036	26.4333	26.4249	32.6122
54.1898	28	35.1374	65.0525	33.8535	56.7922	33.4413	34.2987	54.1231	43.8793		28.9891		45.8333	12.9019	36.1126	30.7682
46.8281	25.6885	34.6906	37.5236	33.0941	22.2731	21.8979	28.3887	51.3605	24.5601		9.47895		45.7241	51	50.1684	19.8924
23.3347	50	34.3404	81.4898	41.3819	26.1389	21.6	21.7525	37.4482	27.9953		27.6257		45.7	25.1731	55.1133	19.8266
55.2494	15.4762	34.1026	32.6291	54.9449	34.2945	10.3386	16.4318	45.602	20.0655		13.6818		44.091	49.4747	50.1881	28.5717
32.8673	15.3721	34.0461	48.6806	46.9468	33.202	58	36.3687	28.6002	51.7757		27.0775		43.4111	23.8005	23.4838	56.8273
23.3361	14.7647	33.8258	30.7505	41.8368	49.717	19.2542	32.956	11.0887	36.3393		25.3555		43.3254	47	27.1568	56.7638
53.7832	44.4	33.8105	65.7155	20.9044	32.9815	28.745	21.6393	24.5238	50.3954		23.8554		42.3819	10.5152	38.1387	27.3982
23.6314	22	33.7828	72.998	32.7907	32.9408	57	40.2322	22.1535	40.2957		11.8073		41.9181	41	16.2997	25.567
34.7259	21.1133	33.7414	41.355	33.0586	23.2744	27.6922	45.2804	9.18557	16.8282		11.7857		41.7745	19.8686	28.6533	25.165
45.5097	41	33.5078	59.4894	34.0472	46.4214	17.8567	47.9389	19.4904	61.7567		21.331		41.3017	37.4895	37.0068	16.7122
22.1135	20.2392	33.4635	51.0299	31.1349	46.2724	51	29.7815	34.4196	46.809		14.0514		41.0612	18.7085	45.2213	23.595
7.05832	39	33.3161	36.7551	26.3491	46.0568	50	36.5745	53.6563	31.8263				41	37	59.674	15.0248
12.2454	18.6386	33.0078	41.4069	42.3594	29.8665	49	50.9183	29.8517	33.8851				41	37	41.5041	19.4862
10.664	18.0531	32.8419	38.8359	41.0849	42.6672	49	26.13	32.614	9.44202				40.09	37	22.9023	17.0469
5.2631	16.3488	32.6465	32.2741	39.1064	28.0976	23.9112	29.3183	41.1418	11.8108				39.8552	35	22.5831	16.9892
3.3825	30	32.3913	22.3809	22.1123	41.9189	46	43.3873	10.7392	23.3037				39.7705	34	26.8282	15.9743
3.97326	28	32.2667	45.7435	15.314	83.5094	22.4739	33.306	48.5075	40.0072				38.8374	32	48.2571	30.6752
74.4561	24	32.1106	4.48563	31.986	27.5772	39	44.6612	10.3953	30.2856				38.2695	28.0817	21.9555	27.9154
39.9903	21	31.7848	21.4585	43.361	40.0501	38.6	33.2149	20.1331	46.6841				38	14.8	47.9379	27.3205
30.2775	20	31.2957	35.6215	38.3102	39.3085	34	61.608	30.284	32.8091				38	28	49.8729	27.2749
25.1117	17	31.1985	39.5103	17.2263	34.7509	26	27.8125	19.5701	23.3678				37.5	25	42.0551	26.8142
48.9945	9	31.1328	37.4742	63.8958	32.5305		36.4558	26.2319	23.5075				37	25	38.3894	8.66723
31.7646	65.8937	30.7707	36.3778	72.2127	31.566		40.6029	33.2052	27.9788				36.3894	11.0915	32.9957	24.9516
20.8977	36.3821	30.5075	23.7643	12.5659	31.1902		48.1901	17.5956	46.8989				36.3568	7.34094	38.7048	24.7604
53.8724	42.5764	30.3843	48.4204	47.5798	30.4758		17.7929	28.1309	47.9445				33.328	21.3098	52.7875	24.6936
27.1635	58.9928	30.0435	34.2517	36.1469	30.0679		38.562	26.9404	21.2646				30.2195	20	40.1196	23.7881
57.9857	31.2342	29.9311	22.8314	40.0183	56.8446		26.2566	19.7547	31.46				30.1096	17	30.922	23.2905
91.3708	38.9688	29.7012	9.91292	30.8121	26.708		55.4523	12.6045	54.6386				29.0003	16	37.2499	22.3445
55.4101	49.0721	29.4956	19.7087	35.3337	26.3208		57.271	22.2666	12.3177				28.9731	7.85806	58.3095	10.2172
33.4874	48.4462	29.4696	14.5937	10.494	25.0778		16.7373	31.9807	65.2867				28.2272	15	29.1938	19.6169
39.9999	48.3552	29.4672	16.06	73.7791	12.284		26.9064	15.4457	22.9182				25.3993	13	35.5331	19.0183
26.1074	44.6132	29.1451	30.5135	28.6098	12.2602		46.1195	34.9874	42.825				25	13	17.9033	19.0125
22.4434	31.3784	29.0337	33.1489	45.0683	24.4668		37.3258	14.6497	28.0075				23.6669	12	16.7743	7.53578
40.4183	46.7462	29.0013	53.1401	23.4777	48.7205		74.6203	26.6352	26.1845				22.4847	7	37.9711	13.0179
54.7028	44.2224	28.9564	16.6929	22.4052	48.5827		57.3241	25.0789	27.2377				19.7234	57.4153	51.7477	11.4369
24.6477	40.8203	28.6592	22.9649	26.9579	24.1103		35.7145	48.2465	30.2268				18.83	42.3717	6.3801	10.2473
72.6574	49.2887	28.6212	29.2913	20.4175	46.7752		27.3704	9.67332	37.1352				18.7196	15.3775	27.2254	10
33.9914	48.7415	28.3349	66.5675	26.6667	45.9981		36.3493	38.5168	12.6009				17.7657	52.1168	24.785	36.4982
24.7603	47.2445	28.0761	24.4167	26.6667	22.4713		29.7507	48.9105	15.8491				16.0793	25.1574	47.9833	35.8235
24.9166	31.0861	27.6693	44.6299	47.5114	21.9755		30.4506	33.5732	41.5964				15	30.9187	79.7177	19.2944
26.0108	45.801	27.1602	41.8128	17.1144	43.5771		40.8118	21.0807	22.0294				14	35.576	35.2758	31.2515
37.9116	57.1021	26.8893	33.0323	39.7118	41.9773		35.3987	13.7082	26.1951				9	63.9642	67.8041	50.0676
48.7196	81.5624	26.8802	78.3669	52.5074	41.4877		22.7141	31.962	63.6318				8	27.0286	21.5422	41.9713
60.8308	50.4715	26.6728	49.4434	24.5053	40.5739		18.7443	19.8375	30.2669				84.9225	28.8507	27.7808	43.7999
19.912	68.532	26.4791	48.8723	21.7063	40.23		130.706	29.5896	32.719				81.2743	39.9056	23.4227	47.9868
61.7474	125.816	26.0689	23.9619	40.5427	39.2911		36.1462	20.2862	30.5624				77.6754	36.8372	46.5526	60.9789
31.4484	17.2714	25.8866	33.5053	27.7292	19.1995		31.7418	23.8909	29.4018				76	51.9684	22.5092	34.1201
30.2876	51.5161	24.535	46.8202	31.2275	37.5431		100.98	30.3188	15.8744				76	25.166	36.945	33.043
67.7961	25.204	24.2105	18.0525	30.9149	36.5542		43.9113	22.4779	52.9013				74	35.7589	45.7209	31.5064
13.8611	33.3377	23.353	52.0727	23.2148	33.1323		33.7444	18.3833	19.2597				71.5306	42.2641	26.3979	29.9989
44.573	33.1359	23.025	49.1092	45.2393	32.5385		23.9141	38.2029	33.4876				68.5545	22.5041	13.5716	42.2436
40.4587	48.3097	23.0232	17.6796	20.7415	31.8221		62.505	52.881	23.7309				68.409	34.7539	52.1301	19.3887
31.1429	96.4955	22.9645	36.2217	25.0582	30.9997		38.9329	16.1464	24.5273				64	50.6615	60.8093	29.9039
55.8501	31.6066	21.94	48.9296	37.2854	14.7972		32.0966	49.2053	28.5515				59.7516	54.4114	57.0537	20.9461
21.8321	93.7877	21.9228	46.9826	15.5504	29.1204		25.3698	31.4942	49.2156				59.3689	33.7198	37.5351	23.194
36.3663	19.9362	21.6281	72.7822	40.8252	25.1313		23.1626	20.3664	25.0901				59	17.4864	48.0296	38.7215
89.6	39.4816	21.4904	47.2513	50.2495	23.1521		28.9229	57.5561	51.4258				57.1863	17.1751	27.9466	36.8583
81.7162	25.1374	21.4626	61.7332	15.0491	23.1224		28.8188	27.2829	24.9375				57	37.487	20.4926	10.0135
74.6	72.4138	21.3217	27.6842	40.2854	20.0602		26.3097	35.2252	29.0796				56.4631	30.9175	46.1821	26.2581
73.5261	34.7978	20.9611	31.5402	42.4883	12.5099		21.5253	14.5814	25.1878				55.5559	23.7527	32.6979	26.2483
68.1	21.2472	20.6942	47.2784	30.3438	10.5362		34.4983	29.2067	46.6966				54.2279	21.8213	25.2306	44.2171
66.1197	63.3623	20.6284	22.6961	33.4577	6.85476		37.6865	30.0175	30.6375				54	23.3081	26.2743	50.6792
64.8633	62.5809	19.6837	37.6305	37.6874	75.4473		31.3794	29.0829	35.3661				53.3246	32.6761	27.496	29.0344
63.0665	30.7482	18.7821	28.15	49	62.4871		33.774	46.5517	41.4787				53.1	30.201	15.0827	28.2754
61.2179	60.2707	18.7304	30.981	26.8156	59.7306		60.445	42.9558	32.66				52.8178	20.7579	20.6964	8.52021
59.8074	59.3508	18.5921	29.3816	49.3767	59.2834		24.0597	19.0056	30.6526				51.7356	44.3327	26.6942	24.5872
58.1	58.5375	18.2519	13.7195	36.5	58.114		26.6299	33.5738	14.4607				51.1801	53.0027	44.0413	38.5373
56.6	28.5025	17.4633	20.0394	41.7344	57.9734		48.5961	18.819	39.0611				51	57.693	45.4	23.7957
55.4	18.7974	17.1891	7.1139	46.7379	55.9862		42.1524	31.3161	19.6645				50.7569	44.7697	29.6163	53.4807
55.0615	18.7137	14.7874	30.3961	30.9511	55.375		38.2257	22.9715	17.8332				50.7196	28.416	43.0493	34.9516
53.2407	28.0689	14.7653	26.3815	29.2574	54.9946		42.5605	18.5452	68.4211				50.4	47.1236	42.5362	40
53.029	27.5237	13.9907	14.6678	34.2502	52.6741		29.6534		43.3578				49.3795	39.6042	18.7648	28.2412
52.6998	54.3772	13.1745	20.8519	45.5221	50.9842		41.4601		39.2995				49	55.5426	29.4819	34.4433
51	27.1696	12.052	21.7211	51.5171	50.0015		34.6035		16.4498				48.2879	44.0199	19.8044	32.9764
50.9316	26.4722	28.8447	28.987	42.9652	49.9186		30.8456		11.8803				46.8162	33.1432	28.7338	19.9659
50.2	49.4545	19.7316	27.809	41.6058	49.7284		62.4333		17.7381				46.0038	48.2177	17.5511	16.1991
49.7398	48.1683	43.3712	20.1149	16.14	49.4026		24.2344		16.8385				45.5684	30.2995	22.8315	37.2
48.168	47.878	52.2582	9.61362	61.636	49.3619		19.2016		17.286				45.4978	20.46	54.2573	10.4634
46.9001	46.8847	19.4604	30.0028	44.4054	49.2221		34.1262		24.4217				45.3242	36.2918	16.2451	32.3912
46.7477	23.2214	25.6364	34.8061	35.3553	48.318		114.213		24.5576				45.1562	22.989	20.1912	16.7172
46.4605	22.2044	64.9202	29.3208	61.2438	47.9595		27.9872		28.2413				45	33.0783	25.2089	13.7807
46.4381	43.3361	22.0626	26.1224	32.5155	47.7433		47.042		28.3548				44.7619	18.7075	28.3521	25.8889
45.1	17.6923	23.7425	31.1301	22.1592	47.5261		26.2455		25.5232				44.4233	23.8191	23.753	26.8793
44.1779	34.514	16.4752	57.266	24.6151	46.5722		35.0277		24.3688				43.7591	35.1561	34.675	28.0273
43	33.7546	28.3961	15.3425	44.9323	46.344		23.3009		30.0301				43.2603	20.8626	28.8585	46.5838
42.1325	33.6767	39.6329	56.4559	30.0039	45.5032		41.1554		24.3989				43.2	20.5943	31.6171	49.4005
41.4711	31.8029	45.0592	36.0639	44.232	45.4646		45.3805		27.209				42.8975	35.9931	33.5563	49.5321
56.1037	30.9275	32.7339	75.9851	74.3581	44.8996		42.2051		20.2057				42.4233	23.1905	30.8151	38.1281
41.1	29.4283	48.591	32.2482	16.53	44.6208		29.9174		51.8379				42.1451	38.6506	54.8205	38.0149
40.0104	29.04	16.128	45.024	17.5939	44.583		16.7634		29.7543				41.1596	42.1342	25.5524	20.6752
39.1	28.8387	21.3962	34.3862	35.9659	44.1628		56.6285		23.3326				41.1382	14.488	37.249	19.4369
38.8909	13.5183	25.4086	29.751	51.5202	43.9347		29.7489		31.8607				41.1296	27.7552	41.2612	53.4148
38.7	26.6018	30.0722	38.5632	22.9011	43.7734		12.9712		24.7518				40.7	39.4694	48.6965	34.253
38.2627	26.5701	17.0799	34.1824	52.3636	43.493		25.4236		43.6831				40.6527	38.5711	19.1523	31.753
38.2018	23.0442	26.7456	38.8842	62.2572	42.9258		46.9385		13.6921				38.9652	12.5162	36.3522	9.91263
37.9091	23.009	32.3801	44.5478	57.4	42.5481		25.9081		34.5406				38.9528	45.8005	16.0858	38.6111
37.8	21.8205	28.008	13.3722	55.7856	41.3897		30.1486		25.0266				38.3278	54.1344	36.5923	39.9869
36.9377	21.4659	26.9018	23.3728	15.4515	40.62		38.4948		8.5455				38.2493	22.0819	24.6589	34.1299
36.2908	21.342	34.9067	27.4516	28.6979	39.7994		30.1834		23.0588				37.1688	28.3383	15.3163	55.4074
35.7	21.1312	22.4548	19.6421	31.9468	39.7238		28.4248		27.7246				36.8902	20.6456	38.5772	34.3995
35.3174	20.6035	53.16	28.3049	36.2455	39.5156		42.877		18.3638				36.8077	39.2946	22.7914	15.1713
35.22	20.0466	26.2861	24.9953	38.842	39.3617		57.6426		32.5234				35.7054	51.2615	20.9265	50.9543
34.6921	17.6365	22.011	33.8408	62.0391	39.0644		93.7082		30.492				35.4487	32.6564	25.23	43.3037
34.4636	8.52237	46.8334	25.5773	20.4612	38.3983		19.7797		18.0299				33.3385	14.1909	61.3768	28.8593
34.2	15.7027	23.3544	51.6344	30.0755	36.6411		40.3369		49.8305				32.9491	26.6936	21.8878	26.5853
33.8475	15.298	17.4769	26.5495	29.8571	36.2958		49.4437		40.8219				32.895	42.7867	24.1988	33.003
33.7277	15.0612	23.5972	38.7492	64.9801	36.2302		35.378		61.9791				31.1637	60.5741	34.1325	45.0917
33.4722	12.0022	37.2939	41.4829	38.2357	36.2179		49.0942		20.6254				30.0205	30.6768	25.104	33.9516
32.7978		50.8183	37.5421	54.7269	35.7312		31.6881		35.6381				29.2134	18.2818	25.617	58.1688
32.2971		56.0474	36.3349	41.798	35.474		64.8699		19.1938				29.0629	20.5608	20.764	14.7286
31.5284		30.9811	31.5155	44.0821	34.5213		25.1774		22.4465				28.5808	39.4241	19.511	20.7582
31.3075		37.0984	43.328	47.4316	33.7939		25.1251		40.5079				28.528	46.1964	46.5686	31.2635
31		31.1675	45.1885	20.7048	33.701		28.7758		43.1714				25.7424	17.7935	46.3433	25.3094
30.3376		30.5144	26.77	59.0643	33.2835		14.4114		32.4971				25.4327	15.1478	52.5616	36.8983
29.701		29.8553	23.0808	39.8872	33.252		46.6584		26.4897				24.7922	29.971	20.0701	37.9391
29		26.4577	44.3964	32.7725	32.8553		60.9077		22.4141				24.3847	29.1466	49.4154	13.4185
28.8951		24.4651	20.3465	60.7797	32.3523		57.8363		49.5082				23.9117	26.4089	24.2136	33.0946
28.8482		22.4236		44.4293	32.3165		52.2522		15.9701				22.5688	21.2533	35.4773	31.0329
27.4777		34.6351		28.0728	31.9331		38.6358		10				21.7	37.7529	35.2851	18.346
27.2914		24.2995		29.036	31.84		31.6918		13.2199				21.6826	20.5944	28.6712	13.1029
27.1646		35.1649		43.4235	31.3359		81.0386		32.7058				20.7	43.0975	87.6571
26.9981		16.3276		53.4315	31.2047		50.6666		17.4396				20.4	4.23931	38.8691
26.4747		25.2871		42.4627	30.9367		23.8299		23.5249				20.3365	15.7434	21.6417
25.5974		26.2018		24.6342	30.928		40.0267		46.6421				20.0649	32.2741	21.6417
25.5489		51.9094		35.1919	30.8783		38.7031		45.6				18.2682	44.1809	20.8566
24.8		19.0795		14.6381	30.5527		29.3123		20.8758				17	48.5276	68.6315
23.7423		26.4459		26.0729	30.0251		71.6992		32.8888				15.8393	21.8236	36.2801
23.4668		43.1692		39.2067	30		43.1425		21.9057				12.3813	17.2914	49.1499
21.3981		36.3394		13.9104	29.7163		48.9592		20.2032				8.1761	19.0973	36.8807
20.3041		25.6038		43.8638	29.367		34.287		23.6481					33.9414	21.9392
19.4		22.7267		72.7697	29.3647		45.0071		21.9885					30.4073	52.8601
16.3026		17.6113		58.0619	29.257		53.3813		40.189					49.5358	26.4828
15.7233		33.192		44.1467	28.4837		40.7581		47.8658					27.8047	27.5112
41.384		44.3519		13.1427	28.1203		27.8179		35.9235					54.0912	27.4435
		27.4415		75.007	28.1087		25.5832		35.5105					53.2876	17.8519
		35.9992		30.2754	25.91		30.6185		63.732					21.2231	17.0958
		36.8944		35.9237	25.358		26.6722		46.1672					36.4157	21.5695
		50.8832		27.6724	22.9183				49.6348					36.5523	19.9455
		40.9979		47.4938	22.7212				29.5547					29.1942	16.6221
		29.3826		32.9351	22.0375									66.5266	36.9608
		26.6353		24.1639	21.7819									30.6572	30.0663
		23.4071		46.7181	21.7368									43.8752	44.7976
		10.9259		60.2471	21.5625									26.8997	50.4558
		40.4574		29.7749	21.1889									32.8932	27.9599
		33.8247		26.3723	21.0551									43.0408	30.945
		49.1622		32.0347	19.4052									25.073	42.9059
		28.6673		38.2845	17.8448									57.8539	46.442
		42.4723		23.0238	17.4087									22.3507	24.8937
		40.4628		12.3508	16.703									34.145	29.471
		34.4999		28.2549	14.7342
		38.1252		51.782	14.1157
		41.876		69.7411	11.2838
		30.4559		59.3215	10.1837
		50.9872		44.6049	8.39982
		48.3		35.7468	9.43926
		18.1		45.582
		67.4		58.9572
		46.7
		25.2623
		32.7064
		30.8368
		39.0893
		30.4075
		24.3497

## Sheet: spindle displacement (µm)
wild-type	E109I	L213I	R241L	N283R	K540C	E545V	I554M	W612C	K1475Q	R1852C	D2439K	R2543K	L2557M	R3152N	K3160Q	R3201N	H3639P
4.84905	7.29774	1.503	0.942469	2.26269	0.91415	1.75575	0.96939	2.36536	2.83978	0.31954	4.46336	0.103711	0.904	4.48297	0.22144	0.563782	0.759222
4.60351	6.24782	1.22199	0.55041	1.16476	3.98727	0.85	1.41566	1.45446	1.33073	0.848231	4.45873	0.228147	0.767	3.70988	0.0858496	0.114939	0.466247
4.00009	5.93966	1.15034	1.0388	2.56216	0.796216	0.834	3.48057	1.29242	0.649922	0.409406	4.39862	0.310648	0.738	3.27962	0.502702	0.884128	0.648285
3.85552	5.89461	0.517965	1.66585	1.94707	5.46045	3.17822	1.2089	3.0503	1.24557	0.584626	4.3325	1.05356	0.7	3.16373	2.31108	0.309596	0.296904
3.75505	5.84893	1.52057	0.992084	1.50105	0.751042	0.78	0.333542	1.82789	0.600314	0.756274	3.50556	0.657914	0.664	2.85165	2.20198	0.706079	0.661547
3.69	5.67484	1.50915	0.486736	0.622276	1.49515	3.59259	0.819094	1.19505	5.27535	0.818051	3.24463	0.197842	1.94958	2.8169	0.533522	0.791207	0.253956
3.39	5.50511	0.996746	0.814292	0.949375	3.65088	1.36039	2.2157	4.08187	2.22914	0.276162	3.21379	0.182428	1.27334	2.72508	0.319106	0.625912	0.110815
3.33818	5.14385	5.44618	0.911131	0.449728	2.14903	0.675	0.203567	1.72986	2.12404	0.131759	2.82782	0.755916	0.619	2.47572	0.410046	0.535676	0.259
3.1384	5.00145	0.482631	0.488957	2.41631	0.686566	2.59054	2.89219	2.87354	3.13488	0.484663	2.80662	0.839247	1.234	2.0279	0.178916	0.137353	0.1455
2.96069	4.44443	3.82073	1.70051	0.634064	1.36079	1.76664	0.16465	2.73274	1.04298	1.24684	2.74919	0.432859	1.19113	1.97802	1.18889	0.201246	0.29
2.77567	4.38078	0.46788	0.227927	1.12387	0.671236	2.93424	0.75695	2.65483	1.52101	0.165872	2.72853	0.40439	2.32101	1.60494	2.35757	0.458869
2.70311	3.5919	1.38783	1.99095	1.35911	0.664955	2.23114	1.27953	1.05795	1.0025	0.174124	2.46216	1.00049	1.13704	1.60207	1.90596	0.299792
2.53964	3.50362	0.919296	1.37025	0.545212	3.22508	1.1	1.61819	4.68463	0.494543	0.390473	2.4	0.270401	1.68072	1.45898	1.07934	2.04137
2.49724	3.27106	0.916209	0.588472	0.918621	3.16879	1.1069	0.421706	2.04368	2.43446	0.188711	2.33851	0.229952	0.549	1.45671	1.26289	0.2621
2.4028	3.14274	1.33753	0.62764	1.38546	5.58313	0.53	1.94058	1.50556	2.35879	0.476838	2.3156	0.331692	1.09608	1.4457	0.346781	0.364821
2.0144	2.99012	1.32597	0.707933	1.33443	3.05197	0.53	3.45527	0.49684	4.69531	0.159849	2.18533	0.689598	2.07119	1.44267	0.726875	1.11344
1.87498	2.87148	2.61709	2.30442	0.826064	1.82316	0.52	1.13055	0.99	0.455982	0.837225	2.17624	0.325647	1.02457	1.42829	0.663402	0.427467
1.82808	2.8591	3.03392	0.311368	1.77122	1.79363	1.55823	2.95377	3.43583	0.907953	0.21513	1.97478	0.70477	2.5263	1.28776	0.35643	0.162271
1.82784	2.7	2.488	0.760842	0.41888	0.591797	1.52192	0.931386	4.86433	0.893584	0.338696	1.80602	1.45223	1.00993	1.24622	1.82605	0.437898
1.80978	2.66037	1.65342	0.667456	0.684008	3.54631	3.52833	0.539865	4.82945	0.421777	0.404994	1.80331	0.448091	0.495	1.22669	0.137839	0.144995
1.74219	2.41937	1.2373	0.425333	6.74849	4.07036	0.99	1.03531	0.957832	1.66086	0.308121	1.78085	0.273295	1.48337	1.20103	0.649312	0.235
1.70438	2.37113	1.2309	0.642929	0.668648	1.14347	0.971651	3.36367	0.9287	1.60006	0.31777	1.77891	0.316391	0.988	1.17989	0.70539	2.94444
1.68329	2.25915	1.21688	1.23229	0.485364	0.571185	0.48	0.159667	0.922486	0.779001	0.13082	1.77599	0.347834	0.489	1.17541	0.5188	0.562508
1.67414	2.23786	1.62112	0.887359	1.15124	2.25808	0.475	1.67174	0.842413	0.777486	1.06605	1.65691	0.52278	0.47	1.16137	0.710574	0.510102
1.62534	2.21889	1.62108	0.558273	1.31477	1.12236	1.89245	0.374124	0.838808	1.16391	0.315133	1.607	0.471501	0.462	1.15888	0.587354	0.998537
1.55576	2.02431	0.807035	1.08302	0.754524	1.11337	1.86894	0.319634	1.217	1.15083	2.13608	1.56754	0.532039	1.80431	1.14873	0.798009	0.733943
1.54443	1.71873	2.34846	3.34454	2.47091	4.83108	0.46	0.685836	1.61948	1.9018	0.48	1.37907	0.407063	1.35026	1.1146	0.290111	0.339307
1.51787	1.65699	0.384653	0.343953	0.609924	4.26329	0.46	3.0268	2.83013	1.13419	0.38	1.37335	0.166412	1.76356	1.10074	1.81036	0.333362
1.49979	1.62244	0.373663	0.643037	0.509671	4.21032	0.890406	0.668202	0.799703	0.728171	0.998693	1.22565	0.603839	0.432	1.01831	1.08969	1.32238
1.48261	1.54807	1.11378	1.65228	0.254341	2.62784	0.884629	1.93333	1.59207	3.96666	2.47691	1.20342	0.456354	0.432	0.97977	2.31633	0.852481
1.33707	1.42204	4.07458	0.157882	1.03138	0.52512	0.44	0.396384	0.78	0.355243	0.627763	1.0841	0.34228	0.431	0.936339	0.627565	0.960328
1.20133	1.37413	2.57558	0.517901	0.892752	1.57044	0.44	2.55662	0.389314	1.77176	0.5821	1.07279	0.172647	0.429	0.923177	0.0992217	0.300011
1.16048	1.31866	2.55619	0.805927	0.161169	0.522721	1.30849	2.94901	0.380553	1.06097	0.847679	1.05199	0.168764	0.429	0.922029	0.531092	0.390816
1.15464	1.28469	0.364243	0.30821	0.581222	1.02915	0.844541	0.399144	0.73	1.76034	1.91749	1.00232	0.188655	0.842	0.912716	0.257113	0.188938
1.11421	1.27272	1.35613	0.495724	0.47713	0.507671	0.42	0.173595	0.351266	1.04285	2.45496	0.935512	0.6625	0.830058	0.87404	0.135465	0.290849
1.10534	1.16847	0.338442	0.975671	1.32827	0.998734	3.79247	3.88511	0.34998	0.347337	0.538258	0.924965	0.322089	2.46661	0.851944	0.512039	0.247915
1.01931	1.1409	1.32875	0.700597	0.329668	0.49387	1.67032	0.838708	2.07471	0.691759	0.996121	0.907098	0.468792	0.82015	0.829032	0.325702	0.33927
1.01455	1.12	0.325678	0.741726	1.15819	1.46757	0.4	0.673511	1.70323	0.342929	0.729813	0.879891	0.543226	3.62723	0.809928	0.430865	0.736733
0.97925	1.10465	2.60471	1.02187	1.81991	1.44742	0.4	3.02562	2.0397	0.683413	0.462623	0.784938	0.567488	4.61941	0.795783	1.01274	2.08866
0.947246	1.08698	0.968561	0.37262	0.284385	2.88609	0.796	0.394902	1.3593	1.34489	0.441124	0.76177	0.259425	1.56204	0.785719	1.33983	0.522427
0.938159	1.07268	0.968333	0.777511	0.143552	2.86976	0.393	3.25593	1.34634	1.00461	0.85032	0.744195	0.13652	1.1535	0.758038	0.235701	2.93051
0.885549	1.06796	0.947775	0.426408	0.561459	1.88328	0.782246	0.297906	0.331183	0.653059	0.370782	0.737401	0.751858	1.14879	0.711595	0.461648	0.9103
0.866531	1.03228	0.618804	0.532804	0.638214	3.74462	0.39	0.644695	1.61115	1.95102	0.368698	0.705151	0.752414	1.14879	0.693246	0.218506	0.51382
0.83498	0.951475	1.2366	1.46457	0.897404	3.26411	0.739892	0.487999	0.930267	0.973613	0.368038	0.694195	1.92393	3.43751	0.68749	0.705274	1.30286
0.823715	0.936313	1.53241	0.410399	0.352971	2.27429	1.1085	0.604023	0.616995	1.25546	0.348698	0.691624	0.163806	2.28499	0.653525	0.497045	1.9732
0.794028	0.933	0.61233	0.592661	2.61963	0.905787	0.74	0.27	0.61	1.25043	0.344752	0.685571	0.829009	1.49541	0.630064	0.215163	0.414675
0.786234	0.92	0.305717	0.402106	0.250014	1.35404	1.84604	0.632878	0.876792	1.25028	0.16	0.681809	0.307123	1.81066	0.629216	0.19	0.512055
0.764723	0.919695	0.59995	1.9121	0.765413	1.80526	1.0622	2.83454	0.580998	0.934211	0.732116	0.655784	0.321674	0.722	0.623924	2.18311	0.690003
0.762555	0.911546	2.6878	0.355245	0.751688	0.44776	0.35	3.01229	0.869028	0.615791	0.415804	0.64232	0.770649	0.354	0.617232	0.981222	0.444876
0.698698	0.9	1.4917	0.446634	2.29018	0.428841	1.38026	5.12474	1.13844	0.912762	0.269727	0.634031	2.80245	0.348	0.608367	2.3548	1.39576
0.676302	0.77	0.876668	0.667509	0.858381	1.70431	2.39331	0.429533	0.552103	0.910334	1.04508	0.60546	0.529686	0.348	0.58945	2.16365	1.88893
0.673369	0.76	0.582987	1.17939	0.29824	0.420032	1.02109	0.788314	2.16411	0.597905	0.13	0.576958	0.397669	0.34	0.587621	0.501863	0.568172
0.670916	0.71	1.74479	3.49229	0.6246	1.25647	0.321	2.41162	0.270187	0.594875	0.242473	0.564058	0.606814	0.337	0.583567	0.691971	1.02452
0.652292	0.685854	1.43567	0.688569	2.99543	0.4072	1.27144	0.386226	0.539735	0.873374	0.473884	0.559269	0.319537	1.67601	0.56754	0.180868	2.77892
0.560457	0.656668	2.29601	1.57431	0.877884	1.21539	0.622534	1.37595	0.78481	1.11837	0.164044	0.518578	0.736085	1	0.538556	1.78807	1.24125
0.559931	0.641417	1.14542	1.54887	0.182848	6.04956	0.919504	0.925442	0.257966	0.831173	0.07	0.50785	0.360823	1.99857	0.518131	0.523564	1.36364
0.556128	0.62597	0.841008	0.347406	0.252361	1.60994	0.3	0.308133	0.762067	0.275808	0.5	0.48643	1.23596	1.65546	0.504434	1.4605	0.137353
0.551242	0.617225	0.84005	0.868552	0.408438	3.18187	1.76252	0.765137	0.755762	0.270333	0.4	0.468668	0.257239	0.970401	0.495708	2.12697	1.30286
0.511711	0.58	0.554357	0.11738	0.278489	0.795376	0.858117	0.780981	0.746987	0.53889	0.39	0.437927	0.304713	0.321	0.488991	0.315453	2.40739
0.501005	0.575219	0.830064	0.394248	0.515384	0.395828	0.561714	1.04516	0.736043	1.86964	0.36	0.428196	0.621535	0.321	0.48406	2.46521	0.211785
0.482137	0.56	0.54956	0.376227	3.10098	1.16489	1.12281	0.552807	0.980749	0.800783	0.34	0.405836	0.267712	0.315	0.462033	1.68497	0.512055
0.477779	0.53	1.5723	0.301528	0.308782	1.52753	0.829915	1.78491	0.23638	0.79828	0.3	0.393236	0.826121	0.31	0.454121	0.218506	0.930952
0.470125	0.501635	0.772466	0.17007	1.2333	0.375603	0.82589	2.27931	0.464274	0.792801	0.3	0.344453	0.61839	0.304	0.450568	0.402404	0.274742
0.462254	0.5	1.02037	0.214061	1.26427	3.35163	1.86365	1.10341	0.683308	0.791533	0.58	0.30147	1.24971	0.907951	0.45	0.52985	0.399969
0.461325	0.5	0.763785	2.14291	0.297835	1.11276	1.04365	2.08103	0.454638	0.261079	0.52	0.27406	1.34112	1.19332	0.445076	1.11716	0.775531
0.460372	0.494236	1.0128	0.63481	0.349411	1.80703	0.25	0.969059	0.449097	1.29946	1.22628	0.226534	0.826668	0.296	0.419274	0.389418	0.522026
0.455122	0.481643	1.25706	0.141113	1.38298	1.77817	0.92306	1.04917	0.209913	0.998559	1.2	0.209382	3.44152	1.46236	0.416918	0.462388	1.07876
0.443873	0.41	0.250708	0.201029	0.592535	1.06582	0.23	0.838132	0.624173	0.984514	0.24	0.189371	0.826121	1.16897	0.407894	4.88203	0.348292
0.371421	0.373976	0.23301	2.03196	0.570287	1.41146	0.23	0.790667	0.608084	0.488935	0.463941	0.157537	0.267712	2.00104	0.348186	2.34564	0.64409
0.35679	0.36	0.695094	0.850276	1.40688	1.40976	0.452664	0.668019	0.399685	0.724277	0.23	0.0673563	0.61839	2.00104	0.312126	1.07228	1.187
0.279245	0.35	0.461243	0.439169	0.889429	0.704454	0.899697	0.675523	0.587123	0.475013	0.22	4.14799	1.02775	1.7147	0.302653	0.974292	0.353704
0.279204	0.34	0.667968	0.243283	0.609954	0.69948	0.632365	1.07169	0.581881	0.470494	0.207	4.05784	0.221298	0.570866	0.300705	2.06082	0.266362
0.245185	0.33	0.443672	2.02357	0.500887	0.698169	0.406	0.129	0.382207	0.67965	0.4	3.60425	1.20043	1.79784	0.299761	3.51142	0.121442
0.237197	0.32	0.438144	0.666445	3.2498	0.346833	0.19	1.36458	0.378883	0.451008	0.555666	3.41519	1.84069	0.526	0.291022	0.254572	0.165084
0.1697	0.217944	0.20521	1.42777	0.375512	0.685417	0.19	1.95644	0.355642	0.441315	0.18	2.99753	1.67756	1.82057	0.287275	0.55415	0.368941
0.144715	0.15	0.816763	1.14742	0.846465	0.341583	0.521565	0.418837	0.875749	0.655321	0.535929	2.87802	0.614409	0.779767	0.263973	1.06163	0.708539
0.0801616	0.13	0.602209	0.387483	0.899583	0.669795	0.500763	0.200693	0.174238	0.218353	0.341833	2.57563	0.266956	0.746208	0.228017	0.301706	1.63793
0.055662	5.44843	0.199857	0.968175	1.0708	0.326941	0.15	1.32325	0.507438	1.06988	0.82	2.54106	1.27445	2.44216	0.225557	1.077	0.122132
0.458661	4.92308	1.57327	0.849265	2.47727	0.323972	0.282471	2.8783	0.150761	0.849029	0.15	2.37558	0.452598	2.44216	0.219234	0.534164	2.93051
1.18642	4.53571	0.582752	0.242594	0.518696	0.317784	0.12	2.00182	3.2527	0.633798	0.14	2.29438	1.24592	0.486086	0.211847	0.503012	0.610893
0.957277	4.50812	0.582343	0.559376	0.946448	0.309743	0.09	0.541845	0.491708	0.632205	0.392859	2.22894	0.376066	0.229	0.209697	1.02723	0.541754
5.45046	4.37245	0.775095	1.34569	3.06654	0.922861	0.06	1.44114	0.682004	0.618702	0.13	2.09931	0.289101	0.223	0.201938	1.4311	0.0998991
1.36307	4.32112	0.576677	0.306999	4.07254	0.298762	0.82	2.06497	1.78932	0.20586	0.381457	1.99927	0.839692	0.864	0.190813	0.93384	0.317472
5.28178	3.84934	0.186123	2.17707	0.63989	0.596707	0.76	1.07285	1.70468	0.823133	0.380246	1.96106	0.507853	0.4	0.109287	0.540759	0.179069
1.56916	3.78551	0.35908	2.44722	2.02447	0.297812	0.7	0.864191	0.982983	0.398231	0.592491	1.96038	1.73456	0.198	0.0938074	0.580874	1.89505
1.09715	3.78227	0.352489	6.37851	1.39187	2.64584	0.68	1.49939	1.80237	0.398195	0.229328	1.88056	0.386881	0.198	0.0936909	1.20704	0.653252
1.00229	3.32074	0.344929	3.12836	0.434052	0.277092	1.18087	0.733773	1.47913	0.596004	0.56596	1.76465	0.747039	0.187	0.0873699	2.79092	0.951702
0.833015	3.25261	0.342525	0.679676	1.03435	0.54535	1.73845	0.6657	0.559108	0.388045	0.11	1.68972	0.451463	0.36747	2.73894	0.644369	0.406822
6.21878	3.2351	0.510496	1.23324	1.74914	0.538504	0.58	0.638988	1.30453	0.581648	0.200673	1.66367	0.375531	1.54812	2.49551	2.33411	0.461572
1.50851	3.2231	0.625342	0.746744	2.23727	1.57865	0.52	0.521866	0.893448	0.575184	0.228472	1.65061	0.143054	0.334397	2.42668	0.981705	0.764209
0.216127	3.19429	0.307	0.720272	0.616565	0.260636	2.47637	0.16429	0.0774805	0.566422	0.150305	1.63227	0.791847	0.654	2.40182	1.09785	0.810457
0.976689	2.92037	0.5655	1.51051	1.12383	0.504455	4.80853	1.22108	1.27084	0.536919	0.11	1.57692	0.241707	0.321016	2.34496	0.963531	1.67557
1.18576	2.85162	0.421335	3.06115	0.705478	0.501681	0.95	1.05705	0.395394	0.524259	0.175923	1.57627	0.885245	0.46252	2.18613	1.83434	0.404979
2.50032	2.80645	0.408153	0.415545	4.01217	1.22888	0.47	0.320258	0.475644	0.493836		1.54861	0.334262	0.152	2.12387	0.306026	0.289992
0.451481	2.72594	0.250527	0.136243	0.604945	0.476257	0.45	1.10245	1.0877	0.462591		1.49284	0.296225	0.436558	2.06555	0.810934	3.43376
0.489245	2.70135	0.249171	0.589903	1.22428	0.42971	0.45	0.786915	0.633658	0.233278		1.47607	0.635764	0.219526	2.05985	1.43558	1.28273
2.21664	2.6529	0.473142	0.478491	0.95046	0.175342	2.18635	2.49223	0.557805	1.87796		1.42181	0.271008	1.0691	2.04362	1.13613	0.344973
1.10134	2.50021	0.352228	0.640854	0.460234	6.405	0.864973	0.411983	2.15392	0.736489		1.35036	1.12265	1.5	2.01877	0.875	0.78279
1.43689	2.41194	0.116674	4.43001	0.289368	5.83487	0.41	0.252866	0.505069	0.477681		1.34933	0.323289	1.24	2.01483	1.22038	0.37447
3.29525	2.09309	0.1782	0.352185	0.339205	5.67253	0.81	0.527258	0.652976	0.435649		1.27899	2.09106	1.09	1.94138	0.659454	3.70132
2.42538	2.08493	0.174857	3.47762	1.05276	5.60558	0.81	0.323681	0.273166	1.1797		1.26873	0.578905	3.89987	1.64871	1.17713	0.0251642
2.39059	1.93995	0.155466	0.217714	0.452151	5.26093	1.99482	1.41832	0.289936	0.892844		1.24578	0.36352	0.89	1.41135	2.01536	2.58402
0.858919	1.93354	4.77604	1.7498	3.045	4.97992	1.30038	0.305463	0.562865	0.406975		1.17147	0.426326	5.20535	1.37176	0.155756	5.48456
0.709046	1.91903	2.67872	1.97969	1.12166	4.36141	0.94	0.437065	0.73573	0.715829		1.16116	0.48042	1.69936	1.36792	0.253875	3.30441
0.888263	1.8737	6.68632	0.830963	3.01033	4.35422	0.3	0.237138	2.39954	0.81094		1.12939	0.101887	4.22537	1.3	0.275102	2.78333
0.652343	1.80923	1.30747	2.30838	2.18348	4.18853	0.830105	0.522999	0.358866	1.97499		1.10053	0.0830403	1.59544	1.27369	0.385272	2.67805
1.62629	1.75625	1.94773	2.70723	1.20348	3.87998	0.27	0.770144	1.50521	0.647768		0.986915	0.307133	1.58443	1.26	3.12099	2.65365
0.723626	1.70217	0.608344	0.187131	3.30355	3.57027	0.529382	1.62798	0.794197	0.704414		0.981946	0.557872	4.67921	1.17883	0.442788	2.01453
0.23097	1.67303	1.19486	0.164198	1.68285	3.23446	0.48	0.951597	2.63788	1.58293		0.937845	0.0433183	2.3324	1.10375	1.29434	2.00885
0.20832	1.64279	5.6867	0.222412	0.929459	3.13026	0.683516	2.82143	0.42132	0.46057		0.9218	0.262308	0.74	1.08331	1.66556	1.97796
2.39448	1.64241	3.86417	0.536857	0.359565	2.93529	0.750783	2.01132	0.190141	0.333598		0.921356	2.03633	2.9593	1.03284	1.49749	1.87625
0.605461	1.61267	2.73169	1.05994	0.216583	2.59355	0.850497	4.67787	0.647994	0.291112		0.920136	0.625972	1.44468	1.03004	1.71222	1.77391
3.55503	1.61238	1.05293	1.61044	1.178	2.49207	0.297099	1.15746	2.12726	0.489958		0.891992	0.294319	1.43533	1.0281	1.21174	1.69031
0.579196	1.55747	4.57127	1.23973	1.93764	2.31383	0.11	0.852872	0.201528	2.45343		0.885805	0.545832	1.43166	1.02582	0.880128	1.58639
1.00715	1.49286	2.528	0.597456	1.53533	2.27621	3.86122	0.478461	1.0079	0.469699		0.857652	0.793952	2.12447	1.00144	0.543315	1.53593
0.453263	1.47715	0.49408	0.421747	0.489276	2.209	3.14954	1.47222	0.296018	0.598553		0.850711	0.16403	2.10574	0.990429	0.736649	1.29654
2.08897	1.44548	0.982316	0.179742	0.676027	2.12013	2.98996	0.777985	0.204859	0.695311		0.84582	0.75581	2.81011	0.985756	0.174912	1.28857
1.32117	1.39422	1.95471	1.10516	1.34811	2.11549	2.64635	0.242398	2.84151	1.034		0.839979	0.315079	2.10008	0.92598	0.561475	1.27853
1.06688	1.3273	2.4291	4.29531	2.11284	2.04184	2.43485	0.501144	1.05415	0.293822		0.810584	0.482747	1.37648	0.918542	1.37244	1.27811
1.57916	1.27028	0.480055	1.04609	0.660761	2.01296	2.37721	1.72152	0.520895	1.61542		0.791323	0.298215	2.06223	0.918116	0.956686	1.21688
0.849093	1.22734	1.4369	0.7303	1.34229	1.95781	2.08158	0.737067	2.056	0.66329		0.724216	0.51779	1.34	0.9	0.865667	1.20277
0.983473	1.22548	0.952044	0.302818	1.32083	1.9137	2.07368	3.22542	0.854074	0.422629		0.722439	0.449779	0.66	0.891598	0.277751	1.14329
0.331301	1.19248	3.80081	3.5548	1.48642	1.8262	1.83186	0.448568	0.405807	0.718014		0.721821	0.906421	3.87443	0.89	0.454866	1.12015
1.69321	1.18286	0.94435	0.694617	0.468792	1.67531	1.7657	0.298982	2.73749	3.16		0.699379	0.163996	0.63	0.813669	1.84497	1.04829
0.763217	1.14801	1.39188	2.41245	0.56284	1.65613	1.75631	0.452866	0.503095	0.8718		0.695447	1.54919	1.85144	0.79471	1.43176	1.04713
2.17124	1.11414	2.76421	0.215365	2.1105	1.65181	1.62188	1.39955	1.76486	0.912252		0.695289	0.731047	0.61	0.78632	0.800422	1.04389
3.6484	1.10884	0.914895	3.35542	3.47369	1.649	1.5137	2.87846	0.365228	0.415389		0.687837	1.07972	0.61	0.785724	0.868477	1.02804
0.653313	1.03506	5.76621	0.419205	3.21496	1.62435	1.43607	1.74841	0.208101	2.14059		0.615428	0.144787	1.78407	0.78	0.379716	0.947457
0.219735	1.00298	0.864371	4.58094	1.14132	1.57934	1.38997	0.706857	0.583797	3.0192		0.608272	0.859073	2.35854	0.745116	0.976846	0.917346
0.960079	0.934426	2.57532	0.486692	0.453999	1.56725	1.22497	3.67725	0.919327	0.101138		0.593685	0.292023	1.17534	0.738148	0.264558	0.894794
0.89882	0.84641	1.71306	0.203659	1.0631	1.53064	1.21017	2.7724	0.435817	1.80543		0.57681		2.33906	0.734371	0.497998	0.851209
1.83425	0.806512	0.427769	2.68071	0.39	1.46698	1.18294	1.04015	0.272052	3.0192		0.573245		1.67813	0.717578	0.642354	0.833734
1.29759	0.805499	0.427769	0.481481	0.560525	1.44686	1.14357	3.86506	0.612066	0.484771		0.530893		0.55	0.715552	0.190555	0.799447
2.26972	0.786946	3.36886	0.279093	1.03833	1.43181	1.08809	2.90755	0.779488	1.30353		0.493289		1.09511	0.709531	0.177554	0.796642
1.88843	0.757509	3.33575	0.359866	1.37608	1.38577	1.07753	0.641935	1.95941	0.869976		0.484628		1.07784	0.703162	0.525246	0.777485
0.357019	0.75412	0.820722	0.425886	0.69764	1.38034	1.02177	0.529058	0.721822	1.35209		0.475326		3.39336	0.66165	0.342964	0.775843
1.16369	0.74508	2.04663	3.68482	3.17107	1.23229	0.951606	1.9646	1.46379	0.794637		0.465681		0.534921	0.654154	0.268254	0.755024
2.84096	0.67453	2.00481	2.18534	1.51945	1.21511	0.94	1.30556	0.676018	1.50521		0.445999		1	0.616652	0.429414	0.735499
2.60802	0.669661	0.785841	0.491188	0.599135	1.21433	0.928091	2.00133	1.93157	0.357549		0.436104		2.10153	0.611	2.31916	0.718496
2.91952	0.638263	0.377796	0.283407	0.315936	1.20094	0.915089	0.954888	0.242939	0.631508		0.43005		1.56805	0.604263	1.54833	0.704491
0.289551	0.626165	0.754691	0.307614	2.60391	1.18966	0.86	1.22611	0.337711	0.447434		0.357548		2.78174	0.58	0.370483	0.693739
1.75131	0.59	0.373236	0.113639	0.71201	1.16397	0.83	0.611292	1.06522	0.200655		0.321848		0.965133	0.57	0.720394	0.693445
1.73371	0.583246	0.365705	4.67228	0.417973	1.15567	0.76227	0.73143	0.366351	2.42133		0.298648		0.475	0.545132	0.891369	0.670481
1.5039	0.55	0.712644	1.46584	1.07871	1.14798	0.75	2.63108	1.73985	0.295156		0.290286		1.86014	0.528667	0.528498	0.652244
3.25139	0.55	1.05412	3.25262	2.36975	1.13584	0.668825	1.37195	0.541231	0.877585		0.289891		0.916666	0.516077	1.4445	0.615364
0.468281	0.51377	2.08143	4.50283	1.32377	1.11366	0.656937	0.567773	0.513605	0.982402		0.284368		0.914482	0.51	2.50842	0.596773
0.933386	0.5	0.686808	2.44469	4.55201	1.04556	0.65	0.652575	1.87241	1.39977		0.276257		2.29	0.503462	0.551134	0.594799
2.20998	0.46559	2.72821	0.652581	3.84614	1.02883	0.620317	0.164318	3.64816	0.601965		0.273635		2.64546	0.494	2.5094	0.571434
1.97204	0.461163	0.340461	2.43403	0.938935	0.996059	0.58	1.09106	1.14401	1.03551		0.270775		0.868222	0.47601	0.469676	0.568273
0.466721	0.442942	3.04432	0.922516	1.2551	0.994339	0.577625	1.97736	0.221773	1.81696		0.253555		2.16627	0.47	1.08627	0.567638
0.537832	0.44	0.338105	6.57155	1.25426	0.989445	0.5749	0.216393	0.490477	1.51186		0.238554		1.69	0.420609	1.52555	0.547965
0.472628	0.44	1.35131	2.91992	1.96744	0.988223	0.57	1.20697	0.886142	1.20887		0.236145		0.818	0.41	0.162997	0.511339
0.694519	0.422	0.337414	1.24065	0.330586	0.930975	0.553844	1.81122	0.0918557	0.673129		0.235714		2.50647	0.397373	0.573066	0.5033
1.82039	0.41	0.335078	2.37958	1.02142	0.928428	0.535702	1.43817	0.584713	2.47027		0.21331		0.826034	0.374895	0.740137	0.501365
0.442269	0.404784	1.0039	3.57209	0.622699	0.925448	0.51	0.595631	1.03259	3.27663		0.140514		0.82	0.374169	1.35664	0.4719
0.0705832	0.39	0.999483	0.367551	0.790474	0.921135	0.5	1.09724	1.07313	1.59132				0.41	0.37	1.79022	0.450745
1.10209	0.372772	2.9707	1.65628	0.847187	0.895994	0.49	1.52755	0.298517	1.01655				0.41	0.37	1.24512	0.389724
1.27968	0.361063	1.6421	1.94179	1.6434	0.853345	0.49	0.2613	1.30456	0.28326				1.19796	0.37	0.916094	0.340938
0.421048	0.326975	1.30586	2.90467	0.782129	0.842927	0.478223	0.586367	0.411418	0.118108				1.19566	0.35	0.451662	0.339784
0.1353	0.3	1.29565	0.223809	0.221123	0.838378	0.46	1.73549	0.107392	0.233037				1.19311	0.34	0.536563	0.319485
0.15893	0.28	2.58134	1.82974	0.30628	0.835094	0.449477	1.6653	0.485075	1.20022				1.93969	0.32	1.44771	0.306752
2.23368	0.24	0.642211	0.269138	0.95958	0.827317	0.39	1.33984	0.207906	0.908567				0.76539	0.306003	0.219555	0.279154
1.99951	0.21	0.317848	0.429171	1.30083	0.801002	0.386	0.664298	0.201331	0.933683				0.38	0.296001	3.35565	0.273205
0.60555	0.2	0.625914	1.78107	0.383102	0.786171	0.34	1.84824	0.30284	1.31236				0.38	0.28	2.99238	0.272749
0.502234	0.17	0.623971	0.395103	0.516788	0.695018	0.26	0.834375	0.391402	0.701034				0.75	0.25	0.420551	0.268142
0.489945	0.09	0.622657	1.87371	3.19479	0.65061		0.729116	0.786958	0.940301				0.37	0.25	1.53557	0.260017
0.952938	5.27149	3.07707	0.727556	4.33276	0.63132		2.43617	0.664104	1.11915				0.727788	0.221831	1.64979	0.249516
0.208977	4.36585	0.915224	0.475287	0.251318	0.623804		2.4095	0.351912	6.56584				1.45427	0.220228	2.70934	0.247604
0.538724	3.83188	0.911529	0.968408	2.37899	0.609516		0.355857	0.562618	2.87667				0.666561	0.21	1.58363	0.246936
1.62981	3.53957	1.80261	0.342517	3.97616	0.601358		3.47058	0.808213	0.425292				0.906586	0.2	0.802392	0.237881
2.89928	3.12342	0.299311	0.684941	2.00092	0.568446		1.83796	0.395094	0.3146				1.80658	0.17	1.5461	0.232905
0.913708	3.11751	1.48506	0.0991292	0.924364	0.53416		0.554523	0.25209	2.18554				0.869969	0.16	1.8625	0.223445
1.1082	2.94433	1.47478	0.197087	2.47336	0.526415		0.57271	0.667997	0.246355				0.579461	0.157161	4.66476	0.204345
0.669749	2.90677	0.884088	0.145937	0.734583	0.501556		0.167373	0.639615	0.652867				0.846815	0.15	2.91938	0.196169
0.399999	2.90131	1.76803	0.4818	1.47558	0.491361		1.07626	0.463371	0.458364				0.507985	0.13	1.06599	0.190183
0.522148	2.67679	0.291451	1.22054	2.86098	0.49041		0.922391	0.699748	0.42825				0.25	0.13	0.358066	0.190125
0.448867	2.51027	0.580675	0.994468	0.450683	0.489335		1.86629	0.585986	1.1203				0.710007	0.12	0.50323	0.150716
3.23346	2.33731	0.870039	2.1256	1.40866	0.487205		1.49241	1.06541	1.04738				0.674541	0.07	1.89856	0.130179
1.64109	2.21112	1.15825	0.500786	0.672155	0.485827		1.14648	0.752368	0.272377				0.394469	0.574153	2.58739	0.114369
0.246477	2.04101	0.859776	1.37789	1.07832	0.482206		2.14287	0.96493	0.906805				0.5649	0.423717	0.063801	0.102473
0.726574	1.97155	1.14485	1.46457	1.6334	0.467752		1.09482	0.193467	0.371352				0.374392	0.153775	0.816762	0.1
2.71931	1.94966	1.98344	1.33135	0.8	0.459981		1.09048	2.69618	0.126009				0.710627	0.521168	0.743551	1.82491
0.495205	1.88978	0.280761	1.95334	0.8	0.449426		1.19003	0.97821	0.158491				0.643172	0.503148	0.479833	0.716471
0.996665	1.86517	0.276693	1.3389	1.42534	0.439509		0.609012	1.0072	2.07982				0.15	0.927561	0.797177	0.771777
0.260108	1.83204	0.814805	1.67251	0.171144	0.435771		1.22435	0.210807	0.220294				0.14	1.42304	0.705516	0.937546
1.89558	1.71306	2.15114	1.65162	0.397118	0.419773		1.06196	0.137082	0.785854				0.09	1.91892	1.35608	1.00135
0.487196	1.63125	0.268802	1.56734	1.05015	0.414877		0.908565	0.31962	1.27264				0.08	0.540572	0.215422	1.67885
0.608308	1.51414	0.800185	2.47217	0.490106	0.405739		0.374886	0.396751	0.605339				2.54768	0.86552	1.38904	0.875997
0.19912	1.37064	2.11833	4.39851	0.217063	0.4023		1.30706	0.295896	0.981571				0.812743	0.399056	0.70268	0.479868
4.32232	1.25816	2.60689	1.91695	1.21628	0.392911		1.08439	0.405723	0.611249				1.55351	0.368372	0.931052	0.609789
0.314484	1.03628	0.258866	0.335053	1.10917	0.383991		0.952255	0.238909	0.588035				1.152	0.519684	0.675276	1.0236
0.908627	1.03032	0.736049	0.936404	0.312275	0.375431		1.0098	1.21275	0.317487				0.76	0.50332	0.738899	0.33043
0.677961	1.00816	0.726316	0.180525	0.618298	0.365542		0.439113	0.224779	1.58704				0.74	0.715179	1.37163	0.945193
0.138611	1.00013	0.700591	3.12436	0.696444	0.331323		1.01233	0.183833	0.577791				2.86122	0.422641	1.84785	0.899968
0.891461	0.994078	0.690751	1.47328	0.904786	0.325385		0.478281	1.14609	0.334876				2.05663	0.900166	0.407149	1.26731
2.02293	0.966193	0.920929	0.353593	0.414831	0.318221		1.87515	1.58643	0.474618				0.68409	0.695078	3.6491	0.581661
0.311429	0.964955	0.688936	1.44887	0.250582	0.309997		1.94665	0.484393	0.735818				0.64	0.506615	1.82428	0.897116
1.117	0.948199	0.4388	4.40367	1.11856	0.295943		1.28386	0.984106	1.42758				2.39007	1.08823	0.570537	1.04731
1.74657	0.937877	0.219228	2.81896	0.466513	0.291204		0.761095	0.629883	2.46078				2.96844	1.68599	1.50141	0.23194
0.363663	0.797448	0.648843	1.45564	1.22476	0.251313		0.463251	0.407328	1.50541				0.59	0.174864	2.88178	1.16164
0.896	0.789632	0.644712	3.78011	1.50748	0.231521		1.15692	0.575561	1.54278				1.14373	0.171751	1.39733	0.737166
1.63432	0.754122	0.643879	3.08666	0.451472	0.231224		0.864565	0.545658	0.249375				0.57	0.37487	0.819703	0.100135
0.746	0.724138	0.852869	1.66105	2.81998	0.200602		2.63097	1.05675	1.45398				1.12926	2.16422	0.461821	0.787743
1.47052	0.695956	0.628832	0.315402	1.27465	0.125099		0.430507	0.291628	1.25939				1.65	0.475054	1.6349	0.524966
0.681	0.637415	1.03471	3.78227	0.303438	0.105362		0.689966	0.876201	0.466966				1.08456	0.218213	1.51383	0.442171
1.32239	0.633623	0.412568	0.680884	3.01119	0.0685476		0.376865	0.300175	0.61275				0.54	0.699242	1.05097	2.02717
1.9459	0.625809	0.984185	0.75261	0.753747	0.754473		0.627588	0.290829	0.707322				2.66623	0.653522	0.824881	0.290344
2.52266	0.614965	1.50257	1.126	1.96	0.624871		0.675479	0.931033	2.07393				0.531	0.60402	0.301654	0.282754
6.12179	0.602707	0.561913	3.0981	0.536312	2.98653		4.8356	0.429558	0.9798				1.05636	0.207579	0.413927	0.0852021
5.38266	0.593508	0.185921	0.587631	2.46884	3.557		0.962388	0.380111	2.14568				1.03471	0.443327	0.533884	0.737617
0.581	0.585375	0.365038	0.137195	2.92	1.74342		2.13039	0.671475	0.144607				1.5354	1.59008	0.880825	0.770746
0.566	0.570051	0.5239	0.801577	0.417344	4.63787		0.485961	0.376379	1.56244				0.51	1.15386	0.454	0.71387
0.554	0.563923	0.343783	0.071139	2.33689	2.79931		4.21524	0.313161	0.983227				1.01514	1.79079	0.592327	0.534807
3.30369	0.561412	0.443622	1.51981	0.928534	0.55375		0.764515	0.918862	0.356664				3.04318	0.28416	1.72197	1.39806
1.06481	0.561377	0.295305	1.05526	1.17029	3.84962		0.425605	0.556355	2.05263				0.504	1.88495	1.70145	0.4
1.59087	0.550473	0.419721	0.146678	1.37001	3.68719		0.296534		2.16789				1.97518	1.18812	0.187648	0.847235
1.054	0.543772	0.26349	0.208519	1.36566	1.01968		1.2438		0.785989				0.49	1.11085	0.884457	1.0333
0.51	0.543392	0.12052	0.434422	2.06068	2.50007		1.73018		0.328996				2.89808	0.880398	0.792175	0.989293
2.03726	0.529444	1.44223	0.28987	0.429652	1.49756		0.616912		0.118803				0.936323	0.662864	0.862015	0.199659
0.502	0.494545	0.394631	0.556179	1.66423	5.47013		1.873		0.354762				3.22	0.482177	0.175511	0.323982
5.47048	0.481683	2.16856	0.402297	0.3228	2.96416		0.484688		0.33677				1.82315	0.908984	0.228315	0.372
0.963361	0.47878	3.65807	0.192272	0.61636	5.42981		0.576049		0.345719				2.72987	1.023	0.542573	0.418537
1.407	0.468847	0.389207	2.70025	0.888108	3.44554		0.682524		0.244217				0.906484	1.08875	0.649806	0.647824
1.86991	0.464427	0.769093	2.43642	0.353553	0.966361		1.14213		0.245576				2.25781	0.689671	0.403823	0.334344
1.39381	0.444087	1.94761	0.586417	0.612438	0.479595		0.839616		0.564826				0.45	1.32313	0.756267	0.275614
0.928762	0.433361	1.54438	1.82857	2.27609	0.477433		2.82252		1.41774				0.895238	0.37415	1.70113	0.258889
0.451	0.353845	0.47485	3.11301	0.443185	3.32683		0.262455		0.255232				0.888	0.714573	0.475059	0.806378
2.65068	0.34514	0.494256	0.57266	0.246151	1.39717		0.700555		0.731063				1.31277	0.351561	0.6935	0.560546
1.29	0.337546	0.283961	0.306851	2.24661	1.39032		1.16505		0.600601				1.29781	0.208626	0.288585	1.86335
1.26435	0.336767	2.37797	2.8228	2.10027	4.09529		0.823109		0.487978				0.432	0.617829	0.948513	1.48202
0.829422	0.318029	2.25296	2.16383	2.65392	3.18252		0.907611		0.27209				2.14802	0.359931	1.67782	2.97193
1.70986	0.309275	0.654678	3.79925	4.46149	1.34699		0.422051		0.404113				1.69693	0.463809	1.2326	0.381281
0.411	0.294283	1.94364	0.322482	0.330599	1.33862		0.897522		1.03676				1.26435	0.386506	1.64461	0.380149
0.800208	0.2904	0.645121	0.900481	0.703754	2.67498		0.167634		2.0828				1.64638	1.26403	1.0221	0.206752
0.391	0.288387	0.213962	3.09476	0.719318	0.883255		1.13257		0.699977				1.23415	0.28976	2.23494	0.388738
1.16673	0.270366	0.254086	2.9751	0.515202	2.19674		0.892466		0.955822				1.23389	0.555104	0.825225	0.534148
0.387	0.266018	0.601444	0.771264	0.687032	0.437734		0.389137		0.742554				0.407	0.789388	1.94786	1.71265
1.14788	0.265701	0.512396	0.341824	4.18908	1.73972		1.01694		2.18415				1.62611	0.385711	0.191523	0.95259
0.764035	0.230442	0.534913	1.55537	1.24514	1.28777		2.81631		0.410764				1.55861	0.250325	0.363522	0.495631
0.758181	0.23009	0.323801	0.890955	0.574	3.40385		1.29541		0.690813				0.779583	1.83202	0.160858	1.15833
0.378	0.218205	0.560159	0.133722	0.557856	1.24169		0.904457		1.00107				2.68295	2.16538	0.731847	0.399869
1.47751	0.214659	0.269018	0.233728	0.154515	1.6248		1.53979		0.17091				1.14748	0.220819	0.493178	0.682598
0.725816	0.21342	1.0472	0.823548	0.286979	0.795988		0.603667		1.15294				1.85844	0.283383	0.45949	1.66222
0.357	0.211312	0.449096	0.589263	0.958403	0.397238		0.568496		0.277246				0.737805	0.412912	0.385772	1.03199
1.05994	0.206035	2.1264	0.849148	1.08736	0.790311		1.28631		0.183638				0.736154	0.785892	0.911657	0.303426
1.4088	0.200466	0.525723	0.499905	1.16526	3.14894		3.45856		1.62617				1.42873	1.53784	0.209265	1.52863
2.42886	0.176365	0.22011	1.01522	6.8243	0.781287		1.87416		0.91476				0.708973	0.979691	0.2523	0.433037
0.689272	0.170447	2.81001	0.511546	1.43228	1.91991		0.395593		0.721195				1.00016	0.709547	0.613768	0.865779
0.342	0.157027	0.467088	0.516344	2.70679	0.366411		0.806737		1.49491				0.988472	0.266936	0.875511	0.265853
1.3539	0.15298	0.349537	0.265495	0.597142	1.08888		0.988874		2.85753				0.6579	1.71147	0.241988	1.32012
1.34919	0.150612	0.943887	1.16248	1.9494	0.724605		2.12268		0.619791				0.623274	3.63445	0.682651	0.450917
4.35269	0.120022	2.61057	1.24449	0.382357	0.362179		2.45471		0.618763				0.60041	0.613536	0.25104	0.339516
0.655955		2.03273	6.38215	2.18908	2.14387		1.58441		0.712762				0.584268	0.365636	0.25617	0.581688
1.29188		2.80237	2.18009	7.10566	0.35474		1.2974		0.191938				0.871887	0.411217	0.41528	0.147286
1.57642		1.23925	0.945464	0.440821	1.72606		0.503549		0.44893				1.71449	1.18272	0.975552	0.622746
1.56537		2.2259	3.46624	0.948632	2.70351		0.753754		1.62032				1.71168	0.923928	0.465686	0.937904
0.31		1.2467	0.451885	0.414097	1.34804		0.575517		0.431714				1.028	0.35587	2.31716	0.253094
0.606752		0.305144	0.535399	0.590643	1.66418		0.432341		0.649942				0.762982	0.454433	0.525616	1.10695
1.18804		0.597105	0.692425	0.398872	0.33252		1.39975		1.32448				0.743767	2.09797	0.401403	1.51756
0.29		0.793731	0.443964	0.327725	1.97132		2.43631		0.448283				0.73154	0.874397	0.988308	0.134185
0.866852		0.978603	0.40693	0.607797	0.323523		1.73509		1.98033				0.478234	1.32044	0.484272	2.97852
0.865447		1.56965		2.66576	0.969495		0.522522		0.319402				0.677063	0.425066	1.06432	0.620657
1.09911		1.3854		0.561456	0.319331		1.93179		0.1				0.217	1.88765	1.4114	0.550381
1.37193		0.485989		0.29036	0.6368		0.316918		0.264397				0.22	0.205944	0.860137	0.393088
1.08659		1.75824		4.34235	1.88016		3.24154		0.654116				0.207	1.7239	0.876571
1.07993		0.326552		6.41178	0.936141		1.01333		0.348793				0.204	0.0847862	1.94346
1.58813		2.27584		1.27388	1.8562		0.238299		0.470499				0.406	0.314868	0.216417
0.767922		0.786055		0.492684	2.78352		0.800533		0.466421				1.00383	0.645482	0.216417
0.766466		2.59547		4.22303	0.308783		0.387031		0.912				0.364857	1.76724	0.208566
0.248		0.763179		0.585525	2.13869		0.586246		0.208758				0.17	0.485276	0.686315
0.474845		0.793376		0.260729	0.300251		1.43398		1.97333				0.316785	0.436472	0.362801
0.469337		3.02184		3.13654	0.3		1.7257		0.438113				0.247	0.172914	0.982999
0.427961		1.09018		0.695518	0.594326		0.489592		0.606095				0.327044	0.381946	0.368807
0.812165		0.256038		3.5091	0.29367		0.34287		1.18241					0.339414	0.438785
0.581		0.681802		5.09388	1.17459		0.450071		0.879539					0.608147	2.64301
0.326052		0.704452		0.580619	0.29257		0.533813		2.41134					1.98143	0.264828
0.471699		2.32344		2.20734	2.84837		1.22274		0.478658					0.834141	0.275112
1.26302		0.443519		0.262854	0.84361		1.11271		0.359235					3.24547	1.09774
		1.09766		1.50014	2.2487		1.02333		0.71021					1.59863	0.357039
		0.359992		0.605508	0.2591		0.918555		0.63732					0.212231	0.170958
		3.3205		4.67008	0.25358		0.533445		1.84669					0.364157	0.43139
		1.52649		0.553447	1.3751				0.992695					0.365523	0.398911
		3.27983		0.474938	1.36327				1.18219					1.16777	0.332441
		0.587652		0.329351	0.661126									0.665266	0.739216
		0.266353		1.44984	0.435638									0.613145	0.601326
		1.17036		1.40154	0.217368									0.438752	2.23988
		0.109259		0.602471	0.215625									0.268997	3.02735
		3.64117		2.97749	1.05945									0.657865	0.279599
		3.38247		0.791168	1.26331									0.430408	1.2378
		1.96649		0.320347	0.582156									0.25073	0.429059
		0.86002		0.382845	0.713792									0.578539	1.85768
		2.54834		0.460475	0.522261									0.670521	1.49362
		0.404628		0.370525	0.835149									0.682901	0.29471
		1.72499		0.847648	0.147342
		1.14376		2.5891	0.705786
		0.83752		4.18447	0.225676
		0.304559		4.1525	0.101837
		6.11846		1.7842	0.251995
		0.966		3.21721	0.0943926
		0.362		0.45582
		0.674		1.76872
		0.467
		3.03148
		0.981192
		3.39204
		1.17268
		0.60815
		0.243497

## Sheet: # dynein events per min
	# of events	n (total time)	mean # per min (n = 1)	SEP	# of events	n (total time)	mean # per min (n = 2)	SEP	# of events	n (total time)	mean # per min (n = 3)	SEP	weighted average events per min	SD	Z score	p value from Z score
WT	106	154.667	0.68535	0.0373398	78	145	0.537931	0.0414031	122	174	0.701149	0.0347023	0.646025	0.0376148	-	-
E109I	87	174	0.5	0.0379049	88	145	0.606897	0.0405627	89	145	0.613793	0.0404331	0.568966	0.0395255	-2.41648	0.0156705
L213I	102	145	0.703448	0.03793	108	145	0.744828	0.0362043	102	145	0.703448	0.03793	0.717241	0.0373548	2.29916	0.0214935
R241Q	74	135.333	0.546798	0.0427914	103	145	0.710345	0.0376696	86	145	0.593103	0.0407965	0.618339	0.0403653	-0.859889	0.389844
N283R	101	154.667	0.653017	0.0382752	104	145	0.717241	0.0373987	100	145	0.689655	0.0384197	0.685907	0.0380365	1.27997	0.200545
K540C	104	145	0.717241	0.0373987	93	145	0.641379	0.0398282	111	145	0.765517	0.0351843	0.708046	0.0374704	1.99512	0.046032
E545V	75	145	0.517241	0.041498	83	193.333	0.42931	0.0355985	51	145	0.351724	0.0396549	0.432414	0.0385853	-6.62714	4.7e-06
I554M	87	145	0.6	0.0406838	109	145	0.751724	0.0358767	87	145	0.6	0.0406838	0.650575	0.0390814	0.143455	0.885895
W612C	73	145	0.503448	0.0415218	71	145	0.489655	0.0415139	67	145	0.462069	0.0414031	0.485057	0.0414796	-4.89462	9.85252e-07
K1475Q	91	145	0.627586	0.0401482	81	145	0.558621	0.0412364	96	145	0.662069	0.0392809	0.616092	0.0402218	-0.9345	0.350046
R1852C	25	145	0.172414	0.0313696	38	174	0.218391	0.0313211	30	145	0.206897	0.0336401	0.200431	0.032061	-13.7979	< 0.0001
D2439K	85	145	0.586207	0.0409009	70	145	0.482759	0.041498	77	145	0.531034	0.0414427	0.533333	0.0412805	-3.45298	0.0005543
R2543K	41	145	0.282759	0.0373987	52	145	0.358621	0.0398282	41	145	0.282759	0.0373987	0.308046	0.0382086	-10.1839	< 0.0001
L2557M	102	203	0.502463	0.0350927	86	174	0.494253	0.0379024	99	203	0.487685	0.0350825	0.494828	0.035932	-4.92184	8.57752e-07
R3152N	92	145	0.634483	0.0399926	87	145	0.6	0.0406838	124	145	0.855172	0.0292259	0.696552	0.0366341	1.61835	0.105576
K3160Q	95	154.667	0.614224	0.0391411	90	145	0.62069	0.0402949	106	145	0.731034	0.0368242	0.654423	0.0387618	0.266643	0.789777
R3201N	86	145	0.593103	0.0407965	102	145	0.703448	0.03793	83	145	0.572414	0.041085	0.622989	0.0399371	-0.72056	0.471156
H3639P	3	145	0.0206897	0.011821	4	116	0.0344828	0.0169415	2	145	0.0172414	0.01081	0.023399	0.0129229	-19.1947	< 0.0001

## Sheet: Neck transit values
	successful crosses	total attempts	fraction (for n = 1)	SEP (for n = 1)	successful crosses	total attempts	fraction (for n = 2)	SEP (for n = 2)	successful crosses	total attempts	fraction (for n = 3)	SEP (for n = 3)	TOTAL N	weighted mean of neck transit (%)	SD	Z score	p value from Z score
WT	21	33	0.636364	0.0837393	41	68	0.602941	0.0593349	22	37	0.594595	0.080715	138	0.608696	0.0709031	-	-
E109I	28	48	0.583333	0.0711594	18	33	0.545455	0.0866784	36	58	0.620689	0.0637119	139	0.589928	0.0717362	-0.318703	0.749954
L213I	17	44	0.386364	0.0734053	28	54	0.518519	0.0679947	27	59	0.457627	0.0648603	157	0.458599	0.0683331	-2.57693	0.0099691
R241Q	15	36	0.416667	0.0821678	27	54	0.5	0.0680414	15	40	0.375	0.0765466	130	0.438462	0.0745703	-2.78942	0.0052806
N283R	31	51	0.607843	0.0683661	33	63	0.52381	0.0629226	22	46	0.478261	0.0736513	160	0.5375	0.0677422	-1.23803	0.215716
K540C	28	44	0.636364	0.0725204	31	49	0.632653	0.0688689	26	48	0.541667	0.0719178	141	0.602837	0.0710463	-0.100119	0.920265
E545V	18	38	0.473684	0.0809983	16	30	0.533333	0.091084	20	43	0.465116	0.0760635	111	0.486486	0.0818125	-1.92843	0.0538054
I554M	34	55	0.618182	0.0655096	33	62	0.532258	0.0633678	29	51	0.568627	0.0693514	168	0.571429	0.0658854	-0.659111	0.509831
W612C	22	42	0.52381	0.0770642	18	40	0.45	0.0786607	11	29	0.37931	0.0901022	111	0.459459	0.0810458	-2.34939	0.0188037
K1475Q	23	45	0.511111	0.0745172	20	36	0.555556	0.0828173	25	50	0.5	0.0707107	131	0.519084	0.0753453	-1.48184	0.138394
R1852C	1	9	0.111111	0.104757	1	11	0.090909	0.0866784	3	28	0.107143	0.0584512	48	0.104167	0.0736022	-6.02729	1.61189e-09
D2439K	27	51	0.529412	0.0698928	25	33	0.757576	0.0746009	19	46	0.413043	0.0725975	130	0.546154	0.072045	-1.0362	0.300109
R2543K	14	33	0.424242	0.086034	6	27	0.222222	0.0800091	8	20	0.4	0.109545	80	0.35	0.0898782	-3.68332	0.0002302
L2557M	15	44	0.340909	0.0714604	19	55	0.345455	0.0641186	19	58	0.327586	0.0616264	157	0.33758	0.0652555	-4.65872	3.2e-06
R3152N	22	57	0.385965	0.0644812	23	52	0.442308	0.0688744	16	42	0.380952	0.0749329	151	0.403974	0.0689012	-3.47677	0.0005074
K3160Q	27	48	0.5625	0.0716027	18	42	0.428571	0.0763604	28	59	0.474576	0.0650103	149	0.489933	0.0703334	-2.01945	0.0434457
R3201N	19	41	0.463415	0.0778776	20	55	0.363636	0.0648642	8	25	0.32	0.0932952	121	0.38843	0.0751479	-3.53744	0.0004041
H3639P	0	1	-	-	0	0	-	-	0	0	-	-	1	i.o.	-	-	i.o.

## Sheet: total spindle displ per min
	∑D for n =1	N1 (cells)	∑D for n =2	N2 (cells)	∑D for n =3	N3 (cells)	average total displacement (µm)	SEM	p value from t-test
WT	0.754112	16	0.821941	15	1.0015	18	0.865751	0.0738011	-
E109I	0.99788	18	0.632681	15	0.976476	15	0.877066	0.118327	0.9416
L213I	0.740315	15	1.08221	15	0.895309	15	0.905946	0.0988412	0.7632
R241Q	0.72717	14	1.00983	15	0.611909	15	0.784236	0.118208	0.5935
N283R	0.973115	16	0.880094	15	0.788604	15	0.882615	0.0532644	0.8618
K540C	1.14292	15	0.937756	15	1.07909	15	1.05326	0.0606179	0.1245
E545V	0.414605	15	0.431677	20	0.403727	15	0.41817	0.00813431	0.0249
I554M	0.729991	15	0.85823	15	0.791882	15	0.793368	0.0370268	0.4428
W612C	0.672174	15	0.451177	15	0.296209	15	0.473186	0.109088	0.0478
K1475Q	0.693314	15	0.674658	15	0.580419	15	0.649464	0.0349399	0.0807
R1852C	0.0783872	15	0.0451184	18	0.147762	15	0.087591	0.0302355	0.0038
D2439K	0.687405	15	0.672736	15	0.652508	15	0.670883	0.0101167	0.1158
R2543K	0.21787	15	0.191062	15	0.258787	15	0.222573	0.0196916	0.0091
L2557M	0.444472	21	0.574919	18	0.657416	21	0.558136	0.0619888	0.0344
R3152N	0.565388	15	0.57483	15	0.638401	15	0.592873	0.0229266	0.0552
K3160Q	0.701836	16	0.508473	15	0.741695	15	0.65178	0.0720228	0.1066
R3201N	0.552287	15	0.589239	15	0.454091	15	0.531873	0.0403271	0.0269
H3639P	0.00478999	15	0.0195338	12	0.0031448	15	0.00841494	0.00521049	0.0071

## Sheet: p values
	velocity	displacement per event	# events/min	neck transit success	total spindle displacement
E109I	0.9607	0.8587	0.0156705	0.749954	0.9416
L213I	<0.0001	0.1553	0.0214935	0.0099691	0.7632
R241Q	<0.0001	0.0765	0.389844	0.0052806	0.5935
N283R	<0.0001	0.6939	0.200545	0.215716	0.8618
K540C	0.386	0.5422	0.046032	0.920265	0.1245
E545V	0.4328	0.0197	4.7e-06	0.0538054	0.0249
I554M	0.0105	0.6927	0.885895	0.509831	0.4428
W612C	<0.0001	<0.0001	9.85252e-07	0.0188037	0.0478
K1475Q	<0.0001	0.0005	0.350046	0.138394	0.0807
R1852C	<0.0001	<0.0001	< 0.0001	1.61189e-09	0.0038
D2439K	<0.0001	0.7912	0.0005543	0.300109	0.1158
R2543K	<0.0001	<0.0001	< 0.0001	0.0002302	0.0091
L2557M	0.1795	0.6879	8.57752e-07	3.2e-06	0.0344
R3152N	<0.0001	<0.0001	0.105576	0.0005074	0.0552
K3160Q	<0.0001	0.0002	0.789777	0.0434457	0.1066
R3201N	<0.0001	<0.0001	0.471156	0.0004041	0.0269
H3639P	<0.0001	<0.0001	< 0.0001	i.o.	0.0071
	(all against WT; unpaired 2-tailed t test with Welch's correction for velocity data; Mann-Whitney test for displacement per event; Z scores calculated for others)
