# Supplementary material for: Molecular basis for dyneinopathies reveals insight into dynein regulation and dysfunction
Source: eLife. 2019 Jul 31;8:e47246. doi: 10.7554/eLife.47246 (PMC6733598; doi:10.7554/eLife.47246)
Supplement: Figure 3—source data 1. [file elife-47246-fig3-data1.xlsx]

## Sheet: spindle vel (nm per s)
WT/WT	WT/dyn1∆	WT/E545V	WT/R1852C	WT/H3639P
52.3464	62.136	30.1306	33.3029	45.3493
35.6473	28.1317	43.7457	52.872	37.9175
46.2826	23.4065	40.4448	46.606	42.2373
36.4979	34.0932	71.9738	17.7644	75.5986
87.1901	69.4798	115.807	61.3707	41.9679
26.0962	63.0833	66.2707	71.2541	36.5865
26.9055	64.1285	30.0126	27	35.2678
72.2479	58.3891	20.0623	53.6618	70.0238
20.0576	58.378	28	51.1621	32.8333
21.375	55.9936	49.7787	50.0818	53.3523
41.2683	21.9482	16.7212	34.7382	26.298
68.6079	48.3022	15.8648	30.2922	24.1573
55.4624	39.3573	27.246	46.3892	24.1573
35.5902	39.0693	27.9168	39.2445	41.5623
68.2914	31.0733	29.2831	54.6623	52.2523
75.2855	20.8485	7.66701	42.4237	51.9496
28.3436	37.5146	12.9393	36.1794	16.2485
27.9971	69.559	11.4663	51.5275	47.9144
39.4884	38.5778	8.97669	114.032	28.6873
14.8047	37.2693	45.3612	25.8608	35.3841
30.9958	23.9235	40.1392	30.1476	35.2041
41.6244	27.6472	56.8733	16.6981	25.1282
35.293	58.3347	44.1571	21.623	40.2231
36.4534	42.1725	45.4663	19.0617	23.8938
20.4048	53.4603	18.1392	25.6283	23.8938
8.2157	54.2471	27.6767	22.6132	37.5651
41.6637	24.6971	35.717	33.5414	21.4197
12.0639	40.9721	31.3989	40.2772	34.2679
31.4818	62.0916	29.3344	61.4636	25.4039
19.726	26.2553	25.3103	30.4423	25.3496
24.9177	36.2256	10.3574	55.2425	33.5827
27.536	38.2916	30.4729	60.3496	22.9758
56.0776	49.3438	14.4793	43.0988	44.2664
36.8139	33.5594	3.54907	30.1486	16.8526
30.8834	40.0628	6.27928	40.193	41.7183
56.0899	55.2423	1.78122	30.4567	20.4436
20.9726	20.5545	7.77205	37.3351	40.2444
40.3149	62.2268	8.83278	37.3003	24.4388
40.0554	41.1889	7.18193	37.311	24.2873
71.558	61.039	0.751179	44.5791	22.4537
70.6621	49.7432	9.35771	24.3564	33.246
52.7731	55.0895	9.01297	23.8037	31.4541
48.6673	39.5534	25.0975	30.4507	31.0127
47.2891	39.1225	19.9829	24.5291	61.7992
90.9975	16.186	24.4912	29.5803	19.9126
60.7793	22.0587	18.7077	49.6524	27.0865
30.8384	26.7451	11.0252	34.1214	27.0545
68.727	45.6818	20.3581	39.7135	26.8133
22.6674	48.2335	11.4706	26.1755	26.3887
31.7879	46.9484	17.9148	9.25051	25.1155
64.0982	18.075	36.6582	15.1857	24.2826
46.1875	58.5639	43.2091	34.676	15.8547
83.0857	38.8605	42.1963	46.2344	22.7496
30.0915	61.7782	33.9188	32.9415	44.4355
37.2236	44.057	32.4789	21.0133	14.4891
23.0995	65.7853	73.5033	19.6536	41.7816
78.2385	21.7464	60.4972	35.4511	41.1931
35.8271	54.1494	21.4377	30.1128	41.0754
73.3754	63.6938	53.243	32.5557	19.5416
38.0141	32.581	40.6318	57.5908	38.4314
49.1361	15.8185	42.9382	39.7563	36.8849
56.1549	20.0604	43.5725	52.4153	17.7106
73.8706	46.9532	39.3759	53.1116	31.2471
19.0728	42.5897	28.2831	31.8756	15.383
44.6613	45.3247	10.4002	43.9095	30.2784
32.6257	76.522	5.80395	12.6677	29.6123
37.8025	14.4919	56.6586	26.0025	24.1702
34.8326	25.2011	41.5334	23.9496	19.1953
34.5588	63.5588	31.4193	34.0255	15.5092
29.3678	62.301	9.2798	28.8254	14.6536
39.2709	57.5807	23.0214	25.9775	12.3442
25.0495	47.8602	21.9796	42.6372	11.1002
41.4109	38.7576	26.909	17.2492	44.3375
59.0549	44.8862	16.1555	29.4316	23.028
22.8069	30.5562	31.887	26.5003	57.8635
49.8162	37.0068	28.8495	18.3361	41.9857
24.572	34.3415	37.8925	24.9592	44.3156
30.571	57.3368	20.5768	12.2195	22.2056
18.3077	29.1455	30.3134	8.14793	34.0867
34.6598	72.1289	54.6736	43.999	48.7439
53.9243	35.4912	68.1425	21.2467	46.6593
61.7462	86.3577	35.8265	26.3735	30.655
65.5375	28.7789	38.9988	11.939	19.4288
38.0626	76.5451	32.5769	19.6194	21.8944
36.1728	62.7014	59.0218	28.5022	8.0156
114.041	52.8828	59.3541	31.5562	42.6612
104.153	20.78	47.9227	39.9147	50.0385
35.2613	35.8341	22.3278	34.1851	31.3593
63.7965	47.7448	18.8472	18.6336	60.6528
96.1103	20.4134	27.6438	20.5838	43.7197
55.2185	38.7726	42.898	29.8563	29.8549
51.7596	48.7193	17.9266	11.4815	57.6054
51.9893	27.0079	10.077	26.7208	33.3385
17.654	34.331	17.5168	23.58	33.0136
19.5322	18.5738	24.0629	36.4315	21.4929
39.3566	10.3239	33.959	40.0881	19.4552
51.8458	44.6227	20.8939	60.7564	37.7244
49.7108	41.483	35.9785	26.0699	27.4378
33.2935	39.1814	32.2151	32.9418	31.5515
26.1804	48.9677	35.9785	24.6626	25.3074
49.995	36.5239	14.9501	34.4329	11.3429
58.0317	49.9229	33.5184	30.1904	22.7802
39.3854	69.9582	22.8502	19.1734	40.5985
31.9112	44.0397	50.375	19.2446	38.4554
50.5531	49.0509	47.681	14.2879	39.8132
39.5293	44.4706	22.373	11.1141	32.9587
66.8076	58.0096	25.0925	38.2448	34.7263
60.5361	23.2772	22.373	42.9573	47.4103
62.1484	18.4068	17.0414	25.1284	64.944
65.6025	27.6022	58.1368	44.1069	40.8544
69.6061	16.9288	22.648	39.3012	54.5215
65.2526	24.5177	25.7211	41.1912	32.1427
30.1495	31.4691	30.597	44.2212	20.9766
76.1907	51.688	31.4245	41.1474	38.4686
13.4925	20.4059	29.3597	44.3079	31.7253
42.873	60.5514	35.8482	26.9902	31.8717
32.3111	56.4497	66.691	17.6705	51.5993
20.1628	12.9142	49.178	35.2945	11.3731
54.3049	13.7436	37.5765	25.6267	12.7165
53.0278	15.5356	43.7312	35.4622	18.4954
56.5109	20.3923	23.1761	49.3902	37.4388
26.3254	12.6465	23.3782	49.5554	46.4662
29.5578	43.2975	23.1761	16.2334	10.1979
38.6085	54.2681	30.0218	34.9769	21.6896
72.0419	39.1433	43.0972	10.9152	16.5817
45.121	27.8514	38.9875	33.9336	12.5943
37.7529	44.045	21.9399	26.134	25.8648
40.3157	38.7526	28.5054	33.9995	16.8129
58.0784	24.9816	35.3807	40.5379	25.455
48.3076	17.97	11.4429	51.3405	46.1678
36.1171	53.5261	20.1564	45.6517	37.8216
49.6387	23.7996	25.38	23.445	19.3121
54.412	42.1837	46.2051	39.8475	16.4714
45.0731	14.807	23.1098	32.2075	12.2467
66.2355	41.8653	40.5209	25.724
85.5831	16.28	23.223	27.1551
36.8918	16.1928	25.2366	32.2552
30.9727	86.5591	58.3163	17.8295
30.8772	22.3197	34.075	57.8161
42.129	28.5207	27.4119	34.5272
51.4436	36.7265	29.3756	27.3222
61.0988	44.2156	24.1771	36.9323
47.3364	44.4116	26.5011	85.6612
66.5954	56.74	31.6171	56.6448
46.6677	41.922	37.7724	26.8736
38.5938	20.1261	32.0649	19.6076
44.5679	24.1208	28.5692	53.9296
13.1336	85.3087	19.0679	15.8032
20.5937	86.3646	28.5692	30.9004
52.3217	47.982	40.4231	18.8232
71.8808	36.5683	24.6666	24.9563
66.1996	39.7565	28.4873	46.1958
47.3524	36.7811	34.3834	19.3418
37.4767	31.1491	26.0522	42.3123
39.4602	42.976	61.2927	22.1343
38.6006	44.524	32.7004	43.191
47.1885	62.2294	61.2927	48.1417
44.9308	32.7232	54.7266	32.5217
27.8315	52.1149	47.4301	30.4605
47.9408	25.1172	68.4024	30.6467
55.851	56.1131	34.558	35.9937
36.757	18.9279	32.3512	33.7132
35.8681	30.4482	40.3267	36.5539
60.7883	23.4973	56.8963	19.2968
35.0724	52.0186	54.6451	37.5015
24.6264	22.773	30.2022	40.8753
51.1712	12.8073	41.9483	32.7033
58.1089	21.9066	15.8126
41.4653	27.1943	41.9483
73.7675	45.8587	36.0858
47.2749	29.5413	17.4078
57.1868	21.8455	17.0847
67.5827	28.5682	9.24851
60.564	37.5271	55.8482
75.2334	25.962	42.5601
55.128	43.0068	42.6201
38.9774	38.3927	42.5601
54.8089	21.0141	20.0102
36.1915	31.2076	49.6563
55.266	17.6143	39.9551
78.9428	22.0468	30.0647
67.5963	36.5078	27.7104
45.6594	11.3725	30.7126
53.3444		8.73963
98.1212
47.3331
68.0171
62.4056
66.6841
35.5612
39.8846

## Sheet: spindle displacement (µm)
WT/WT	WT/dyn1∆	WT/E545V	WT/R1852C	WT/H3639P
3.66425	3.72816	3.31437	0.999088	4.53493
0.712946	2.81317	4.37457	5.81592	4.17093
2.31413	0.46813	3.64003	3.72848	3.37898
1.45992	2.04559	6.47764	0.532932	3.02394
4.35951	7.64277	4.63229	4.90966	2.93775
0.260962	3.785	5.30166	4.27525	2.92692
0.269055	3.20643	1.2005	0.27	2.82142
5.05735	1.75167	0.401246	1.60986	2.80095
0.601728	4.08646	0.559967	0.511621	2.29833
0.64125	1.67981	4.48008	2.00327	2.13409
0.825366	0.438964	0.501637	1.73691	1.84086
1.37216	0.966045	0.475945	0.605844	1.69101
0.554624	1.57429	1.63476	0.927785	1.69101
2.84722	1.17208	0.279168	0.784889	1.66249
2.04874	1.24293	0.878492	0.546623	1.56757
3.01142	0.625454	0.0766701	2.54542	1.55849
0.283436	0.750292	0.129393	1.08538	1.46236
0.559942	2.78236	1.14663	1.54582	1.43743
0.789769	2.70045	0.0897669	2.28063	1.43437
0.148047	1.11808	2.72167	1.29304	1.41536
0.619917	0.717705	4.81671	0.602953	1.40816
2.08122	0.276472	0.568733	0.333963	1.25641
1.41172	4.08343	0.441571	0.21623	1.20669
0.364534	1.26518	0.454663	0.381235	1.19469
0.612145	4.81143	0.362783	0.512566	1.19469
0.164314	0.542471	1.6606	0.678395	1.12695
1.66655	0.246971	0.35717	2.01248	1.07098
0.120639	2.45832	0.941966	4.83327	1.02804
0.629635	3.72549	1.17337	3.07318	1.01616
0.394521	0.78766	0.759309	0.608845	1.01399
1.74424	1.81128	0.207148	1.65727	1.00748
0.55072	1.91458	1.82838	4.82797	0.91903
5.04698	0.493438	0.723963	1.72395	0.885329
0.368139	0.335594	0.461379	2.1104	0.84263
0.617668	0.400628	0.251171	2.00965	0.834367
1.6827	5.52423	0.32062	0.9137	0.817745
0.209726	0.205545	3.73058	2.24011	0.804888
0.403149	0.622268	4.59305	1.86502	0.733163
1.20166	1.64756	0.861832	1.11933	0.728618
6.44022	1.83117	0.150236	0.891581	0.673611
4.23973	2.98459	1.49723	0.730693	0.664921
5.27731	0.550895	0.721037	0.238037	0.629082
3.40671	1.1866	1.25488	4.87212	0.620255
2.83734	0.391225	1.99829	0.981165	0.617992
3.6399	0.809302	0.734735	0.591607	0.597378
1.82338	1.76469	1.30954	3.97219	0.541729
1.23354	0.802354	0.661513	0.341214	0.541089
2.06181	3.65455	0.610742	4.36848	0.536266
0.680022	1.92934	0.802941	1.83229	0.527775
0.953636	0.938968	0.358297	0.18501	0.50231
1.28196	0.903751	3.66582	0.303715	0.485651
0.461875	1.75692	4.753	0.693519	0.47564
0.830857	1.55442	4.21963	0.924689	0.454993
0.902746	2.47113	0.678376	1.31766	0.444355
2.23341	0.881139	0.324789	0.210133	0.434674
0.692986	3.94712	1.47007	0.393071	0.417816
0.782385	0.434928	1.20994	1.41805	0.411931
0.716541	4.33195	0.214377	0.301128	0.410754
7.33754	5.0955	0.53243	1.95334	0.390832
0.760283	2.28067	1.21895	0.575908	0.384314
3.93089	0.474556	3.86444	3.97563	0.368849
6.17704	0.401209	1.30717	2.09661	0.354212
2.21612	2.34766	1.18128	3.1867	0.312471
0.572185	2.55538	1.41415	3.50632	0.30766
1.78645	4.07922	0.104002	2.63457	0.302784
0.652513	4.59132	0.0580395	0.253354	0.296123
1.89013	0.289837	2.83293	0.780074	0.241702
0.696652	0.504021	1.66134	0.957982	0.191953
0.345588	3.81353	2.19935	1.02076	0.155092
0.881034	1.86903	0.185596	1.15301	0.146536
1.57084	2.30323	0.460429	1.0391	0.123442
0.751484	3.35022	1.09898	0.852744	0.111002
0.828218	1.55031	1.07636	0.172492	0.886749
4.72439	3.14204	1.29244	1.47158	0.46056
0.228069	0.916687	1.91322	0.79501	1.15727
2.98897	0.370068	1.44247	0.733446	0.839714
2.94864	2.40391	1.89462	0.499185	1.32947
0.91713	3.44021	0.823071	0.610977	0.222056
0.183077	1.45727	0.303134	0.0814793	1.0226
1.38639	4.32774	4.92062	1.31997	0.974878
4.31394	2.12947	2.7257	0.637401	3.26615
3.08731	4.31789	2.86612	0.263735	1.53275
1.96612	0.575579	2.33993	0.358169	0.971442
0.761252	3.82725	0.325769	0.588581	0.437888
0.361728	4.3891	1.77065	0.570045	0.240468
4.56165	1.58648	1.18708	2.20893	1.27984
3.12458	1.039	1.43768	1.59659	0.500385
0.352613	2.15004	0.223278	1.02555	1.56797
1.27593	1.43234	0.188472	0.186336	0.606528
2.88331	0.816536	0.552876	0.411676	1.31159
4.41748	1.5509	0.857961	0.597126	1.1942
0.517596	0.974387	0.179266	0.114815	0.576054
1.55968	1.3504	0.201539	0.267208	2.66708
0.52962	2.05986	0.175168	1.8864	0.660272
0.585965	0.185738	0.962515	0.728629	1.07464
0.787131	0.103239	0.67918	1.20264	0.583656
1.03692	1.78491	0.417878	4.86051	1.88622
3.47976	4.1483	3.59785	0.260699	3.29254
1.99761	1.95907	2.25506	0.658835	0.946544
0.523609	2.93806	3.59785	0.986506	0.759221
0.9999	0.365239	0.448503	1.03299	0.340287
5.22286	2.99537	1.34074	1.50952	0.683407
1.57542	3.49791	0.914008	1.53387	0.405985
0.638224	0.440397	1.51125	2.69424	2.30733
2.02213	2.45255	0.95362	0.142879	0.398132
2.76705	3.55765	0.67119	0.222283	2.30711
4.00846	5.80096	2.0074	0.382448	1.04179
1.81608	1.16386	0.67119	2.14786	3.79282
1.24297	0.368136	0.340828	0.502568	0.64944
1.31205	0.828067	0.581368	0.441069	0.817089
3.48031	0.846438	0.45296	2.35807	0.545215
5.87273	1.22589	0.771632	0.411912	0.321427
0.602991	1.57346	0.61194	3.09548	0.839064
4.57144	2.5844	0.942736	0.822949	1.53875
0.269849	0.612176	0.880792	0.443079	4.12429
0.42873	3.63308	1.43393	1.07961	0.318717
1.61556	2.25799	3.33455	0.70682	2.57997
0.403255	1.03314	1.47534	0.352945	0.113731
4.34439	1.09949	1.50306	0.768802	0.127165
0.530278	2.79642	0.874624	0.354622	0.184954
0.565109	0.815691	2.31761	0.493902	0.748776
0.526508	2.02344	0.233782	2.97333	1.85865
0.295578	1.29892	2.31761	0.324668	0.101979
1.15826	3.79876	1.50109	0.349769	0.650689
1.44084	0.782865	2.58583	0.43661	0.497451
0.902421	1.11406	2.33925	0.339336	0.251885
1.51011	2.20225	1.097	0.784019	0.258648
0.403157	1.55011	1.99538	1.69997	0.504386
6.38862	0.499631	1.76904	0.810759	0.509099
2.41538	0.539099	0.114429	0.513405	0.923356
3.25054	4.28209	1.00782	1.82607	2.2693
0.992775	0.237996	0.5076	0.70335	0.386243
3.26472	3.3747	0.924103	0.398475	0.164714
1.35219	0.29614	0.231098	0.322075	0.489867
5.29884	0.418653	0.405209	1.80068
5.13499	0.814	0.464459	0.271551
1.47567	0.323856	0.252366	0.322552
0.309727	1.73118	0.583163	0.178295
0.617545	0.446393	1.02225	2.89081
0.42129	0.855621	0.822357	0.690544
3.08661	5.50897	1.17502	1.36611
1.83296	0.442156	1.20885	0.738646
2.36682	2.6647	1.06004	5.13967
1.99786	3.9718	0.316171	2.83224
1.40003	0.41922	1.5109	0.537473
1.15781	0.201261	0.961948	0.392153
2.2284	1.20604	1.42846	0.539296
0.131336	5.97161	0.190679	1.58032
0.61781	7.77281	1.42846	0.927011
4.18574	3.35874	1.21269	0.188232
0.718808	1.46273	0.739998	1.49738
5.95796	0.79513	1.99411	1.38587
1.42057	2.20686	1.37534	0.193418
1.49907	1.24596	1.04209	1.26937
1.18381	0.42976	3.06463	0.66403
1.54402	3.11668	1.30802	1.29573
2.35942	3.73376	3.06463	0.962834
1.34793	3.59955	0.547266	0.97565
0.834944	2.0846	0.474301	0.304605
0.479408	1.00469	0.684024	0.306467
1.11702	0.561131	0.691161	0.359937
1.10271	1.32495	1.61756	0.674265
2.51077	1.21793	2.01634	1.46216
1.21577	0.70492	1.13793	0.578904
1.05217	1.56056	3.27871	0.375015
1.23132	0.22773	0.604044	0.817505
2.04685	0.384218	3.35586	1.30813
3.48653	0.876263	0.158126
1.65861	1.08777	3.35586
3.68837	0.458587	0.360858
1.41825	1.18165	0.174078
0.571868	0.655365	0.854236
1.35165	0.571365	0.18497
1.21128	1.50108	1.11696
2.257	0.25962	1.7024
0.55128	3.44054	2.13101
1.5591	1.53571	1.7024
1.64427	0.630422	0.800408
0.723829	0.312076	2.48282
2.7633	0.352287	3.99551
6.31542	1.54328	2.10453
9.46348	1.09523	1.10841
6.39231	0.682348	0.614252
0.533444		0.0873963
5.88727
1.89332
3.40086
1.24811
4.66789
0.355612
1.59538

## Sheet: # dynein events per min
	# of events	n (total time)	mean # per min (n = 1)	SEP	# of events	n (total time)	mean # per min (n = 2)	SEP	weighted average events per min	SD	Z score for WT/WT	Z score for WT/-	p value for WT/WT	p value for WT/-
WT/WT	102	154.56	0.659938	0.038105	91	144.9	0.628019	0.0401525	0.644493	0.0390957	-	0.000322247	-	0.999761
WT/-	100	144.9	0.690131	0.0384167	86	144.9	0.593513	0.0408041	0.641822	0.0396104	-0.000327573	-	0.986357	-
WT/E545V	84	144.9	0.57971	0.0410058	102	144.9	0.703934	0.037925	0.641822	0.0394654	-0.000327573	-1.3602e-17	0.999761	1
WT/R1852C	73	144.9	0.503796	0.0415359	96	135.24	0.709849	0.039025	0.60327	0.0403237	-0.00508629	-0.00475242	0.995931	0.99617
WT/H3639P	62	144.9	0.458444	0.0413934	79	135.24	0.545204	0.0428189	0.500328	0.0420815	-0.0174306	-0.0170944	0.986117	0.986357

## Sheet: Neck transit values
	successful crosses	total attempts	fraction (for n = 1)	SEP (for n = 1)	successful crosses	total attempts	fraction (for n = 2)	SEP (for n = 2)	TOTAL N	weighted mean of neck transit (%)	SD	Z score for WT/WT	Z score for WT/-	p value for variance from WT/WT	p value for variance from WT/-
WT/WT	26	39	0.666667	0.0754851	34	54	0.62963	0.0657149	93	0.645161	0.0698121	-	0.345164	-	0.729944
WT/-	34	55	0.618182	0.0655096	30	48	0.625	0.0698771	103	0.621359	0.067545	-0.345164	-	0.729944	-
WT/E545V	18	44	0.409091	0.0741215	25	55	0.454545	0.0671408	99	0.434343	0.0702433	-2.92754	-2.66217	0.003417	0.0077632
WT/R1852C	13	30	0.433333	0.090472	29	58	0.5	0.0656532	88	0.477273	0.0741142	-2.2763	-1.99727	0.0228281	0.0457926
WT/H3639P	18	37	0.486486	0.0821695	15	32	0.46875	0.0882155	69	0.478261	0.0849734	-2.1243	-1.85492	0.0336451	0.0636105

## Sheet: total spindle displ per min
	∑D for n =1	∑D for n =2	average total displacement (µm)	SEM	p value from t-test (from WT/WT)	p value from t-test (from WT/dyn1∆)
WT/WT	1.17593	1.27538	1.22565	0.0497264	-	0.4799
WT/-	1.16124	1.1862	1.17372	0.0124792	0.4799	-
WT/E545V	0.902433	0.75487	0.828651	0.0737816		0.1259
WT/R1852C	0.482471	1.04542	0.763944	0.281472		0.3827
WT/H3639P	0.482549	0.582338	0.532444	0.0498948		0.0382

## Sheet: p values
	velocity	displacement per event	# events/min	neck transit success	total spindle displacement
WT/dyn1∆	0.0001	0.9109	0.986357	0.729944	0.4799
WT/E545V	<0.0001	0.0013	1	0.0077632	0.1259
WT/R1852C	0.0013	<0.0001	0.99617	0.0457926	0.3827
WT/H3639P	<0.0001	<0.0001	0.986357	0.0636105	0.0382
	(all against WT/dyn1∆, except WT/dyn1∆, which is against WT/WT; unpaired 2-tailed t test with Welch's correction for velocity data; Mann-Whitney test for displacement per event; Z scores calculated for others)
