# Supplementary material for: Molecular basis for dyneinopathies reveals insight into dynein regulation and dysfunction
Source: eLife. 2019 Jul 31;8:e47246. doi: 10.7554/eLife.47246 (PMC6733598; doi:10.7554/eLife.47246)
Supplement: Figure 4—source data 1. [file elife-47246-fig4-data1.xlsx]

## Sheet: FL velocity values (nm per s)
wild-type				E109I				R241L				N283R				K540C				E545V				I554M				W612C				K1475Q				R1852C				D2439K				R2543K				L2557M
148.571	280	129.241		14.6236	110.768			93.3343	160			120	111.111			183.226	192	160		101.053	300			99.046	87.7433			62.1277	71.9995			142.856	154.997			120	20.5718			120	57.1435			77.6493	28.9517			93.3343	62.6086
102.857	240	68.5714		70.0002	200.004			53.3332	72.7281			72.7281	120			100	180	89.9985		198.507	280			99.046	80			73.8462	114.286			132.002	142.221			91.4283	28.3075			39.9999	200.004			71.1111	62.2223			239.999	80
80	240	80		70.0002	39.9999			80	180.004			80	129.997			89.6	168.893	133.332		213.333	240			20.5718	49.4109			30.4762	94.5467			128.002	120			80	25.3975			102.857	80			76.1943	11.5795			106.666	160
200	213.333	60		70.0002	114.286			200.004	70.0002			94.5467	80			180	160	80		112	240			71.4906	160			48	80			128.002	80			42.1061	30.188			48.0005	75.676			50	107.999			191.999	116.362
112.727	189.484	120		93.3343	80			120	91.4283			106.666	133.332			103.704	160	128.002		62.8571	240			54.0542	80			48	80			93.3343	80			39.9999	28.5717			85.7145	95.9985			72.7273	16.0001			35.5547	89.6009
90	186.663	80		95.9985	95.9985			106.666	106.666			106.666	106.666			80	160	84.444		105.882	226.667			40.7743	99.9993			84.7059	80			90.3219	151.113			39.9999	19.9996			83.8089	102.857			55.3846	57.1435			109.631	125.715
176	182.857	91.4286		109.09	89.9985			66.6677	41.7395			64.0004	135.998			160	160	92.573		105.882	226.667			93.3343	91.4283			40.5063	60.0002			125.715	135.386			37.5003	7.40729			93.3343	80			160	66.6677			128.002	85.7145
53.3333	180	103.784		64.3676	53.3332			99.9993	120			80	150.003			95.1351	160	90.6656		60	213.333			111.999	89.9985			80	43.6355			112.729	160			36.3637	7.88777			106.666	57.1435			100	49.2317			39.9999	70.0002
72	180	133.333		75.2933	120			120	80			116.362	43.3335			31.5493	160	86.1536		133.333	209.974			80	80			48	99.9993			112.729	111.999			34.6672	80			48.4211	61.5394			128	160			19.459	99.9993
96	176	64		60.9525	101.054			88.8896	106.666			65.0003	128.002			60	160	106.666		200	209.974			62.8566	106.666			53.3333	54.9147			113.778	80			34.2864	10.6672			58.9466	66.6677			28.2353	104.617			80	49.9993
68.5714	170	120		80	87.2741			160	160			44.4452	53.3332			80	160	87.5682		68	200			64.0004	139.999			80	55.8482			115.199	139.999			30.77	25.9457			100.513	86.6679			160	31.6985			99.2585	80
65.4545	160	53.3333		94.9997	98.1806			160	115.863			57.1435	173.334			126.667	160	74.286		65.641	200			80	26.8795			48	62.2223			106.666	89.9985			26.6667	24.2418			129.997	73.8451			12.973	80			71.1123	64.0004
106.667	160	127.273		95.9985	89.9985			160	116.362			120	139.999			27.4286	160	128.002		74.2857	200			133.332	97.7792			42.3529	56.2959			80	129.233			24.286	5.37811			120	88.8896			160	33.8147			53.3332	48.5987
113.939	160	86.6667		88.8896	80			123.638	53.3332			106.666	95.9985			80	160	87.999		53.3333	188.598			88.8896	80			62.2222	51.4281			101.538	80			23.2558	15.6098			120	70.5096			57.1429	80			54.1926	86.6679
25.9459	160	240		85.1616	99.9993			120	80			65.0003	94.1161			94.5455	151.111	80		60.6061	186.667			106.666	62.2223			11.4286	95.9985			106.666	39.9999			22.3259	9.57199			94.2227	48.0005			8.98876	14.6669			111.999	133.332
125.714	160	80		71.1123	69.0907			68.2347	200.004			104.617	61.5394			48	150	95.9985		95.5556	186.667			39.9999	95.9985			60	106.666			120	80			20.7401	17.4706			76.9239	53.3332			31.6981	22.2221			111.999	120
41.1215	160	91.0769		80	57.1435			160	200.004			111.999	114.286			80	146.667	99.9993		61.8868	182.857			106.666	99.9993			66.6667	56			109.09	138.179			19.3097	16.9491			88.5719	86.6679			8.53933	120			73.8451	118.623
96	160	80		35.5547	133.332			160	120			80	97.7792			120	142.857	48.0005		18.4615	176			48.0005	80			48	64.0004			114.286	65.4536			17.9774	39.9999			45.1274	80			19.3103	80			120	117.893
80	160	80		106.666	110.002			95.9985	89.4123			110.002	120			189.091	141.818	106.666		33.6842	170			58.667	57.9721			48.8889	73.3322			120	293.336			14.7362	8.47469			160	120			13.3333	95.9985			67.3686	89.9985
57.1429	160	60		67.1994	95.9985			213.334	95.9985			111.999	133.332			136	141.538	66.6677		53.3333	160			44.2553	17.2309			31.5152	64.0004			80	57.8316			13.3329	8.06263			12.1217	129.997			176	120			80	92.9036
56.338	160	19.9985		80	37.7014			87.999	80			160	106.666			140	141.538	49.9993		27.8987	160			73.3322	99.9993			71.1111	91.4283			93.3343	239.999			13.0231	23.7032			21.4629	45.5165			46.6667	48.0005			160	35.1509
89.4118	160	0.824742		62.2223	95.9985			60.0002	71.1123			29.9999	80			32	141.176	137.145		68.5714	160			160	99.9993			56	55.001			120	142.221			12.4447	18.3327			160	44.7453			26.6667	62.5006			24.6158	34.2864
115.556	153.333	3.33333		70.0002	74.286			80	92.2048			87.2741	102.857			146.667	140	64.0004		11.8681	160			128.002	137.145			60	91.4283			64.0004	86.8076			11.0895	4.75288			75.2933	120			36.3636	80			139.999	7.15107
68.5714	152.727	54.2857		116.362	97.7792			320.006	160			80	14.7362			24.6154	140	139.999		98.6301	160			160	120			160	49.5229			73.685	60.0002			10.6672				53.3332	91.0332			44.6154	5.9703			86.6679	48.0005
93.3333	149.333	58.6234		93.3343	80			59.0479	120			80	65.4536			13.5849	140	50.527		33.6842	160			106.666	160			24	80			119.183	183.532			9.79584				160	106.666			45.7143	64.0004			35.5547	97.7792
106.667	148.571	80		57.1435	120			80	106.666			120	53.5998			120	135.385	160		39.4737	160			80	53.3332			53.3333	80			73.0424	125.58			8.81371				68.5707	80			29.2683	68.5707			14.4447	73.8451
80	144	80		73.1423	73.3322			88.8896	99.9993			80	80			100	133.333	133.332		80	160			95.9985	15.5562			97.7778	89.9985			116.362	59.0479			8.75012				80	53.3332			19.1667	93.3343			27.4291	80
80	144	40.8163		66.3819	73.8451			120	50.9087			91.4283	66.6677			84.1026	133.333	88.8896		106.667	160			120	53.3332			19.3103	20.3546			160	95.9985			8.47469				186.663	74.286			16.6667	95.9985			191.999	120
60.6897	140	224		14.3712	103.998			13.3329	200.004			176	106.666			38.0952	128	48.0005		40.9091	160			120	106.666			88.8889	97.7792			66.6677	93.3343			8.42104				86.1536	90.2139			77.037	20.606			160	354.296
66.6667	140	96		27.5868	87.999			280.007	80			114.286	23.333			92.1212	128	53.3332		80	160			143.998	80			27.0722	58.181			125.715	117.893			7.61858				76.9239	70.0002			85.3333	39.9999			111.999	120
14.3713	140	36.9231		114.286	150.003			106.666	84.444			80	47.0597			67.2	127.059	95.9985		65	160			41.9511	64.0004			66.6667	80			124.446	106.666			7.36786				80	69.0907			24.4444	160			47.6196	58.181
80	138.182	58.6667		80	80			120	128.002			80	87.999			112	126.897	28.2352		200	160			69.565	19.2403			44.4444	63.4481			89.9985	21.5377			7.05819				71.1123	160			26.6667	7.74258			36.3637	80
48	137.143	6.15385		111.999	14.8459			80	106.666			16.7435	80			68.5714	125.714	64.7619		41.0811	160			103.53	39.2158			23.1111	80			115.556	17.3916			6.75575				6.75154	160			3.51351	139.999			66.6677	53.3332
86.6667	133.333	101.816		34.6672	71.9995			49.9993	120			80	99.9993			40	123.875	102.857		204.444	152.727			80	46.8476			64	17.5789			135.386	148.57			6.15426				33.767	129.997			36	50.9087			46.5125	146.669
71.5789	133.333	60		160	111.999			399.998	64.0004			57.7785	125.715			160	122.353	58.4611		20.3175	146.667			106.666	80			105	73.3322			95.523	6.70091			6.02085				73.8451	62.4399			75	99.9993			56	99.9993
80	131.429	200.03		89.6009	80			160	160			13.4061	103.998			48	120	75.4726		120	146.667			160	80			48.8889	66.6677			104.488	120			5.24628				64.2734	74.8391			53.3333	64.0004			293.336	90.6656
112	130	3.38023		78.0497	80			114.286	239.999			80	133.332			80	120	83.0771		102.857	140			97.5011	128.002			21.0526	56.3627			80	160			5.16075				106.666	85.3345			60	10.2568			143.998	114.286
91.4286	128	160		91.6379	200.004			106.666	106.666			24.3486	106.666			120	120	76.5967		42.1053	140			21.758	111.999			100	42.6658			106.666	120			4.72625				80	83.3329			18.1333	48.0005			91.4283	128.002
51.4286	128	38.2609		66.6677	213.334			120	160			99.9993	126.665			112	120	83.0191		88	140			74.6665	68.5707			40	58.9466			80	64.0004			4.44468				75.1513	70.304			133.333	80			239.999	60.0002
102.4	125.714	68.8372		54.7361	126.665			80	133.332			99.9993	80			102.857	120	110.002		68.4967	140			120	21.2251			28.3871	48.0005			117.333	51.7642			4.31304				70.0002	80			50	2.78248			160	69.4743
80	125	85.3333		73.9616	173.996			22.8565	4.66601			129.997	143.998			112	120	95.9985		96	140			80	62.8566			14.4	72.7281			93.3343	74.286			4.28503				139.999	200.004			133.333	95.0333			120	93.3343
69.3333	123.509	160		88.8896	114.286			60.0002	80			69.3324	106.666			106.667	120	103.53		39.1111	140			80	80			102.857	99.9993			120	160			3.99943				160	200.004			57.1429	54.1172			57.1435	16.0001
133.333	120	60		102.222	66.6677			80	143.998			94.5467	128.002			160	120	109.09		88	133.333			58.9466	106.666			70.5882	80			99.9993	45.7145			3.80909				74.6665	80			30.2703	41.5992			133.332	43.0774
26.3736	120	94.5455		108.236	89.9985			106.666	125.001			111.999	129.997			92.7273	118.71	133.332		70.5882	133.333			44.8003	80			50	91.4283			115.556	8.81936			3.7937				80	80			16.5517	19.2122			12.5491	53.3332
13.3333	120	64.7619		91.4283	88.5719			80	160			53.3332	86.6679			194.286	114.286	85.7145		50.9091	131.429			60.0002	120			51.7647	65.4536			99.046	58.181			3.71253				102.222	56			130.909	50.9087			20.3174	83.0771
68.5714	120	80		112.942	133.332			31.9993	5.28274			120	91.4283			160	114.286	110.002		80	130.909			64.6164	115.556			53.3333	43.6355			120	187.83			3.22852				186.663	10.6672			76.5217	106.666			103.785	70.4006
133.333	120	57.7778		80	66.6677			69.0006	160			30.77	137.145			120	114.286	80		90.6667	128			106.666	83.1991			47.0588	103.702			120	85.3345			3.20055				160	74.999			38.5185	133.332			61.5394	114.286
97.7778	120	106.667		120	80			111.999	133.332			68.9665	120			14.2222	114.286	120		106.667	128			95.9985	80			34.9091	86.6679			87.7433	97.7792			3.07748				97.7792	120			120	48.0005			46.8963	80
106.667	116.364	96.9673		99.9993	89.9985			99.9993	95.9985			95.9985	99.9993			106.667	113.333	62.8566		80	128			120	67.6914			80	120			126.665	173.334			3.02575				95.9985	87.999			80	21.0533			114.286	53.3332
120	115.968	117.647		99.9993	80			93.3343	200.004			125.715	58.667			19.3103	112	89.9985		60	125.714			49.9993	106.666			80	88.8896			109.09	137.145			3.01037				91.4283	88.8896			40.8907	44.4452			46.0615	106.666
152	114.286	128		93.3343	86.6679			111.999	160			87.999	58.181			8	111.113	86.1536		133.333	125.212			64.0004	89.9985			30	8.77979			80	73.3322							66.6677	133.332			30.7692	64.3469			120	97.1444
90	113.333	80		14.6236	111.111			88.8896	160			80	106.666			100	110.769	120		66.6667	122.924			65.8813	25.8825			200	96.5523			98.8235	147.692							39.9999	99.9993			66.6667	86.6679			200.004	85.3345
80	112	133.333		70.0002	73.8451			160	19.3939			71.9995	99.9993			68.5714	110.769	65.2301		62.8571	120			80	106.666			56	13.0002			102.857	102.222							139.999	75.4277			200	200.004			37.0143	102.068
52.3077	112	32.9412		70.0002	160			88.8896	160			213.334	68.5707			64	110	64.0004		106.667	120			64.0004	27.7416			31.4286	49.4109			106.666	160							74.073	17.614			148.581	80			68.5707	87.999
16.9697	109.474	60		70.0002	80			125.715	57.7785			91.4283	86.4012			131.429	110	89.4123		120	120			70.5891	25			16	38.5186			106.666	126.665							54.2863	111.999			80	6.57579			99.9993	80
8	109.091	68.5714		93.3343	80			80	148.57			53.3332	106.666			133.333	110	123.076		60.4444	120			80	61.8176			128	80			62.2223	122.668							60.0002	66.2853			213.333	53.3332			120	106.666
32.381	108.571	186.667		95.9985	128.002			12.4133	11.5196			160	137.145			41.8182	110	26.6667		62.8571	120			46.3166	80			25.4545	47.7426			99.9993	80							45.7145	99.9993			7.27273	80			133.332	160
80	106.667	96		109.09	52.6822			120	11.5196			160	139.999			114.286	108.235	80		42.5506	120			80	80			73.1579	32.2588			80	134.998							88.8896	93.3343			80	48.0005			29.7136	88.8896
91.4286	106.667	145.449		64.3676	13.8457			137.145	80			80	102.857			36.8098	108.235	80		112	120			95.9985	93.3343			71.5789	45.7145			70.5891	91.4283							80	186.663			160	64.0004			39.9999	95.9985
30.3448	106.667	140		75.2933	72.7281			80	120			83.6363	110.768			27.6923	106.667	115.556		111.111	120			95.9985	160			80	133.332			34.2864	160							97.7792	68.8376			66.6667	10.8107			68.0011	99.9993
75.5556	106.667	100		60.9525	99.9993			48.0005	80			103.998	111.999			57.1429	106.667	200.004		60.9524	116.923			80	69.565			35	64.0004			35.5547	120							64.0004	80			80	80			44.4452	73.3322
94.2857	106.667	60		80	53.3332			80	106.666			57.1435	120			130.909	106.667	25.2638		75.2941	115.556			105.366	180.004			90.4348	80			29.0907	124.446							104.443	26.6667			10.4348				93.3343	93.3343
111.111	106.667	126.667		94.9997	56.8888			5.54504	49.9993			57.1435	80			440	106.667	67.1994		100	113.333			80	133.332			57.7778	72.7281			213.334	80							91.4283	80			14.2466				80	64.0004
90.9091	106.667	189.966		95.9985	28.3075			41.9903	80			86.4012	120			192	106.667	76.5218		91.4286	112			85.3345	80			83.5821	29.0907			58.181	75.2933							66.6677	47.0597			44.4444				105	139.999
121.145	106.667	96.8421		88.8896	58.181			88.8896	95.9985			186.663	53.3332			100	106.667	64.0004		160	112			93.9997	71.1123			96	67.3686			73.5999	137.145							25.8069	26.1542			166.68				76.5218	97.1444
180	104.828	240		85.1616	133.332			125.715	120			89.2304	129.997			53.3333	106.667	128.002		49.7297	112			80	57.9721			80	120			94.9997	88.1349							91.4283	9.03707			160				57.1435	93.3343
98.8235	104	60		71.1123	120			114.286	9.412			80	133.332			46.6667	106.667	160		28.4932	111.304			46.6658	60.0002			43.0769	80			90.4363	180.004							160	40.7269			66.6667				70.0002	49.9993
200	104	102.857		80	133.332			160	133.332			220.001	114.286			9.0566	106.667	91.4283		70	109.091			110.002	120			51.4286	57.1435			84.2111	139.999							75.7899	143.998			8.51677				10.4342	95.9985
200	102.857	77.5		35.5547	68.5707			85.3345	128.002			66.2076	86.4012			51.7639	106.667	99.9993		64.6154	109.091			99.2018	120			57.2477	61.5394			68.5707	104.617							120	80			160				49.9993	92.9725
80	102.857	106.667		106.666	120			104.349	7.0005			80	176			101.058	106.667	143.998		100	108.571			139.999	53.3332			66.6667	80			90.6656	78.3336							80	80			80				133.332	63.0307
70.4762	101.818	65.8824		67.1994	116.925			200.004	80			60.0002	133.332			160	106.667	139.999		120	106.667			120	80			133.333	76.6663			115.556	120							29.5659	94.8148			133.333				68.5707	53.3332
91.1623	99.0476	200		80	67.6914			133.332	80			60.0002	120			106.667	106.667	186.663		114.286	106.667			87.1427	99.9993			60	66.6677			120	66.6677							80	98.0652			8.15287				49.9993	116.925
160	98.9484	87.2727		62.2223	13.7149			70.0002	31.9993			99.9993	71.9995			64	106.667	39.9999		71.1111	106.667			62.2223	100.466			80	49.9993			32.941	106.666							80	95.9985			142.222				160	42.3525
160	98.8235	22.8571		70.0002	98.461			42.6658	66.5258			80	99.9993			148.571	105.6	133.332		102.857	106.667			88.8896	73.8451			34.7826	39.9999			97.1444	114.286							92.9725	47.2723			21.8803				112.592	86.1536
114.291	98.6301	180.045		116.362	95.9985			111.999	213.334			60.5408	93.3343			115.556	104.615	75.1513		100	106.667			94.5467	62.3995			73.3333	42.3936			113.332	95.9985							72.1943	114.286			22.2222				37.0737	97.7792
100	97.7778	173.333		93.3343	149.093			80	177.776			35.5547	80			208	104.615	97.3901		45.7143	106.667			110.002	48.0005			21.2245	93.3343			113.332	101.819							70.5891	13.165			18.3908				99.9993	32.7272
144	96.6038	50.9091		57.1435	98.461			120	180.004			62.2223	43.0774			133.333	104.186	103.998		128	106.667			99.9993	67.6914			44.4444	87.2741			83.4786	66.6677							39.9999	82.964			30.2703				86.6679	75.5544
160	96.2978	57.1331		73.1423	200.004			120	78.9403			62.2223	95.239			240	104	160		116.923	106.667			80	80			44.4444	48.0005			88.5719	80							80	61.7151			80				34.2864	61.5394
120	96	100		66.3819	120			34.2864	113.332			80	122.351			61.7143	104	120		48.8889	106.667			53.3332	53.3332			13.6842	72.7281			114.286	80							160	80			14.1667				48.0005	50.9087
101.333	96	6.73646		14.3712	96.841			44.0004	151.113			48.0005	101.178			46.0606	102.857	49.9993		70.5882	104.615			106.666	39.9999			33.3181	41.5992			80	101.819							94.9997	84.323			80				47.1104	53.3332
48.2759	96	96		27.5868	93.3343			111.999	68.5707			93.3343	125.715			150	101.818	88.1627		120	104.615			133.332	78.0497			53.3333	58.667			50.1197	53.3332							61.1757	71.1123			147.67				17.7781	80
64	95	106.667		114.286	139.999			128.002	99.9993			80	123.638			99.3103	101.818	91.4283		110	102.857			133.332	45.7145			53.3333	63.1575			52.0937	56.8425							54.6829	71.9995			12.3077				66.6677	80
55	94.2857	109.996		80	102.857			97.7792	133.332			111.999	151.113			80	101.053	91.4283		72.7273	101.053			53.3332	85.3345			64.7619	58.9466			80	167.272							93.3343	80			80				10.42	111.999
128	93.913	194.286		111.999	57.1435			200.004	125.715			133.332	95.9985			46.5116	100.513	91.4283		82.0513	100			25.5066	85.7145			66.6667	62.2223			80	110.002							75.6522	80			80				24.4447	106.666
85.8535	93.3333	133.333		34.6672	89.9985			120	95.9985			93.3343	77.0368			184	100	80		85.8537	100			99.9993	82.3894			93.3333	53.3332			111.999	111.999							120	51.8911			15.3846				106.666	93.7939
12.1667	92.3077	155		160	85.9247			65.186	160			106.666	66.6677			43.2323	100	99.9993		77.7143	100			93.3343	66.6677			42.1053	38.0005			120	34.5462							25.6005	58.3776			36.3636				128.002	106.666
45.7143	91.4286	106.667		89.6009	102.857			80	173.334			68.5707	123.998			138.182	100	106.666		61.1765	100			87.999	80			49.4845	21.818			109.09	44.2098							32.3595	70.7681			37.8947				51.4281	120
108.568	90	74.1818		78.0497	86.6679			31.2197	43.8713			160	99.9993			114.286	100	56		133.333	100			80	133.332			44.4444	49.2317			91.4283	160							84.444	71.5785			133.333				106.666	73.3322
140	88.8889	80		91.6379	108.573			80	80			106.666	66.6677			54.7368	100	111.999		96	100			99.9993	80			34.9993	60.0002			160	120							45.7145	15.4838			160				64.0004	80
26.9755	85.7143	160		66.6677	180.004			80	15.2377			60.0002	106.666			30.5882	98.8235	200.004		37.6471	100			33.9399	106.666			35.5556	53.3332			99.2018	22.8565							48.7498	120			11.2663				70.5891	71.1123
19.5745	83.2	227.692		54.7361	68.5707			60.0002	4.40967			125.715	134.735			96	98.2857	95.3842		74.4828	98.4615			120	7.21863			80	43.6355			128.002	85.3345							88.4198	106.666			4.11765				106.666	80
93.3333	83.0769	90		73.9616	89.9985			18.064	146.669			120	93.3343			51.2821	97.7778	84.2111		110	97.1429			80	97.7792			44.4444	93.3343			80	68.8376							80	80			112				18.1139	70.4006
72	82.8571	131.429		88.8896	88.8896			144.997	16.0001			81.6676	120			120	97.7778	37.8944		104	96			106.666	80			67.6923	74.6665			80	94.5467							72.7281	106.666			120				109.09	71.5785
146.667	80	125.714		102.222	75.9995			97.7792	99.9993			61.2775	120			92.3077	97.1429	104.349		60	96			46.6658	53.3332			30.5455	120			102.222	99.9993							99.9993	4.40687			106.667				20.9234	115.556
114.286	80	114.286		108.236	97.7792			80	68.2347			106.666	74.286			137.143	97.1429	103.702		146.667	96			109.09	68.0853			60	43.6355			93.3343	107.638							10.2369	58.5704			106.667				14.5457	49.6543
100	80	94.1176		91.4283	34.2864			106.666	95.9985			120	80			80	96	35.5547		146.667	96			102.222	77.1419			45.283	70.0002			139.999	133.332							57.1435	46.3166			55.664				29.4739	37.9663
80	80	90		112.942	43.6355			38.2609	80			72.94	89.9985			24.7619	96	53.6585		120	96			86.6679	139.999			57.1429	55.7569			135.998	99.046							80	106.666			47.2712				53.3332	80
85.92	80	112.941		80	84.0288			80	266.671			45.3337	39.9999			88.8889	96	74.999		71.1111	95.3188			95.9985	45.2176			17.2549	80			83.1991	160							111.999	16.0001			58.8248				133.332	70.5891
89.4118	80	146.667		120	97.7792			106.666	80			80	64.0004			133.333	96	80		125.217	93.3333			80	80			58.1818	74.286			134.196	170.001							73.3322	67.5			7.01789				17.5335	93.3343
40.7374	80	106.667		99.9993	80			57.1435	60.0002			80	120			106.667	96	48.0005		108.333	93.3333			120	93.3343			80	84.7071			200.004	101.054							79.092	60.0002			42.1053				45.7145	77.2416
63.3333	80	293.333		99.9993	80			80	23.6196			80	120			48	96	125.001		80	93.3333			60.0002	87.999			60	80			120	103.998							45.7145	71.9995			100				6.81763	52.2449
71.5789	80	106.68		93.3343	19.5774			180.004	39.9999			99.9993	139.999			57.7778	95.4839	93.0217		33.5484	93.3333			200.004	59.6367			50	89.9985			120	160							120	62.8566			26.6667				7.45799	67.4283
108.182	80	62.9787		101.538	120			160	65.0003			57.1435	80			37.6471	94.1176	82.1625		65.4545	93.3333			94.9997	12.3947			80	80			160	106.666							160	86.6679			6.66667					93.3343
93.7931	80	43.0769		68.148	83.4786			106.666				68.5707	133.332			120	93.9151	68.5707		106.667	92.3077			110.002	64.0004			45.7143	80			64.0004	84.444							68.5707	80			150					106.666
50.1961	80	80		62.728	80			88.8896				65.8813	15.0005			22.7692	92.6316	160		160	91.4286			80	23.1877			96	80			106.666	139.999							29.9999	62.8566			96					54.7361
87.2727	80	120		47.0597	53.3332			91.8512				60.0002	111.999			43.0769	92.3077	120		96	88.8889			95.9985	73.0424			68.5714	43.6355			95.9985	101.538							53.3332	87.2741			1413.36					80
48.7749	74.8587	86.1538		80	22.8565			36.9228				80	80			160	92	101.054		68.5714	88.8889			64.0004	120			46.3158	31.305			120	57.9316							66.6677	80			11.5254					89.9985
74.6667	74.2857	133.333		111.999	31.9993			111.999				66.6677	99.9993			125.714	91.4286	85.7145		83.6364	88.8889			39.9999	280.007			80	111.999			111.303	55.145							133.332	96.841			11.6859					99.9993
57.4815	72.381	93.3333		80	31.9993			111.999				84.444	133.332			109.091	91.4286	89.9985		98.3133	88.8889			80	106.666			106.667	74.286			186.663	53.3332							80	10.1702			24					102.857
106.667	71.7949	80		125.715	111.999			66.6677				67.6914	80			80	90	74.286		26.6667	87.2727			42.6658	75.2933			88	66.6677			84.7071	71.9995							22.8565	106.666			16					22.5638
48.8889	71.1111	120		106.666	66.6677			66.6677				186.663	114.286			49.5238	90	74.0005		66.6667	86.6667			48.0005	19.9996			102.857	70.4006			125.715	17.9716							36.9228	66.6677			60					80
100	71.1111	106.667		71.9995	80			120				99.9993	160			80	88.8889	115.556		106.667	86.6667			80	44.0004			80	80			80	80							71.5785	80			30					97.7792
62.2545	70	84.4444		66.6677	64.0004			80				106.666	133.332			168	88.8889	85.9247		98.0645	85.3333			80	22.6091			80	76.5218			105.806	129.233							80	80			106.667					77.2416
64.7059	70	76.6667		53.3332	114.784			80				45.7145	143.998			42.1053	88.8889	120		120	84.7059			160	44.4452			53.3333	55.3843			84.444	13.1148							66.6677	20.7997			15					80
102.857	67.6923	120		66.6677	80			26.6667				120	62.2223			14.0337	88.8889	86.1536		126.316	84			160	80			41.6	33.4172			135.998	80							31.1119	65.8813			104.63					95.9985
89.4118	66.6667	106.667		66.6677	80			4.13802				90.6656	139.999			54	87.619	85.7145		160	82.5			80	66.6677			40.7547	80			112.942	148.57							95.9985	24.6158			17.561					106.666
57.4648	66.6667	117.653		89.9985	80			88.8896				39.9999	64.0004			160	87.2727	80		98.4615	80			48.0005	62.8566			51.2	17.4999			180.004	125.715							99.9993	49.9993			5.16129					48.0005
100	65.4545	200		89.9985	101.819			7.35097				59.4869	80			152.727	86.6667	60.0002		86.8246	80			120	80			68.5714	20.7401			80	120							80	66.2076			5.81818					13.5382
97.7778	64	14.4578		64.0004	133.332			61.1757				106.666	106.666			54.7368	86.6667	99.9993		80	80			160	27.6368			120	17.5613			126.318	80							80	99.9993			38.4607					48.0005
123.077	64	98.4619		26.6667	80			56.4714				120	53.3332			134.389	86.6667	106.666		98.4615	80			120	16.6036			80	93.3343			58.667	103.53							93.3343	67.3686			36.3636					80
104	64	120		48.0005	31.579			62.2223				48.0005	80			160	85.7143	47.0597		85.7082	80			99.9993	80			70	65.8813			103.076	99.9993							98.8235	95.9985			42.6667
176	64	58.1818		62.2223	37.2417			220.001				80	99.9993			112	85	48.0005		140	80			80	18.3136			80	30.589			160	49.9993							31.9993	50.9087			35
88	64	69.3333		80	91.4283			73.8451				71.9995	95.9985			128	84.7059	120		45.2174	80			114.286	46.6658			61.4493	48.0005			120	81.5992							106.666	95.9985			19.2578
88	62.8571	160		80	58.3327			120				80	120			80	83.8095	80		80	80			29.9999	34.2864			38.3099	19.9996			103.415	146.669							80	78.3664			68.5714
98.1818	62.2222	91.4286		66.6677	93.3343			180.004				64.0004	80			36.6667	83.3333	53.3332		46.3158	80			20.1065	61.3329			80	48.8897			133.332	111.999							80	80			140
140	62.2222	123.333		80	101.819			111.999				106.666	64.0004			108.571	83.2	75.7899		80	80			31.1859	12.3075			70	70.4006			120	37.8944							80	54.2863			32
74.2857	61.7544	112		95.9985	80			5.4244				35.5547	120			160	83.0189	71.9995		42.1053	77.7778			62.2223	120			67.6923	106.666			91.1102	80							93.3343	70.0002			140
51.2	60.2607	65.0228		65.8813	111.999			120				64.0004	65.4536			80	81.3793	171.428		100	77.2881			98.8235	120			43.2432	80			99.9993	99.9993							80	80			70
19.1549	60	90.6667		70.304	67.6914			95.9985				120	97.5011			46.4873	80	133.332		24.1509	76			113.332	63.5893			75.7895	64.0004			113.206	101.054							133.332	70.304			65
32.7273	60	36.3121		91.4283	101.819			106.666				80	88.4198			34.7826	80	73.3322		90	73.8462			89.9985				69.0909	80			104.617	23.9996							77.6473	14.8141			96
50	60	50.5263		68.5707	76.3642			120				80	66.6677			139.996	80	53.3332		91.4286	73.8462			80				80	120			106.666	38.2609							101.819	99.9993			36.3636
15.7895	57.7778	64		71.1123	48.8897			6.66717				93.3343	99.9993			101.053	80	64.0004		69.5652	73.3333			22.2221				66.087	47.0597			102.857	10.5492							75.9995	120			80
23.1579	57.1429	45.1282		52.8565	160			80				39.9999	49.9993			110.345	80	62.5456		58.8235	72			29.0907				60	25			101.407	120							64.6811	29.9999			48
124.994	56.2963	46.6667		61.9359	35.2942			186.663				120	111.999			110.769	80	94.9997		194.325	72			57.1435				30	49.9993			116.362	6.27506							65.4536	57.7785			93.3333
56.4706	56	58.6667		86.6679	85.1616			9.67681				80	133.332			128	80	80		60	72			9.99998				57.7778	80			102.857	102.222							29.0907	80			140
160	55.814	106.667		111.999	53.3332			13.7235				57.1435	139.999			160	80	70.0002		80	71.1111			27.6915				72.2586				129.997	93.3343							94.5467	99.9993			106.667
97.7778	53.3333	88.8889		70.5891	55.001			180.004				39.9999	150.003			49.3617	80	97.7792		31.1111	70.9677			120				12.6984				113.685	111.111							86.6679	72.382			29.0909
160	52.175	106.667		68.5707	60.0002			133.332				45.2176	18.064			41.3082	80	106.666		12.6316	70.9091			80				20.2667				160	114.286							71.9995	160			80
17.5	51.7647	71.1111		80	51.0147			120				70.0002	64.0004			21.6949	80	87.999		33.6232	70			34.9994				26.6667				120	160							213.334				34.2857
91.4286	48	50.3704		82.2859	24.6158			16.6662				67.6914	120			104.987	80	80		80	69.5652			80				40				43.0774	15.3419							87.999				100
106.667	48	106.667		77.0368	58.0402			56				90.6656	97.7792			137.143	80	76.191		58.4615	69.0909			44.4452				100				120	10.5137							64.0004				22.4
80	47.6923	97.7778		80	133.332			160				93.3343	97.7792			200	80	239.999		64	68.5714			74.286				80				80	6.1978							99.2018				20.8
120	43.6364	88.8889		83.8089	64.6164			80				120	112.729			80	80	95.9985		80	66.6667			80				18.8889				99.9993	11.2276							92.3089				20.8
43.6364	42.1053	77.5758		80	99.046			29.4739				95.9985	111.999			100	80	101.819		160	66.6667			133.332				80				70.0002	12.3075							77.4604				19.1304
80	42.1053	49.5238		71.7245	130.666			16.0001				80	116.362			135	80	89.9985		2.70042	66.6667			68.5707				50				97.1444	99.9993							53.9993				32
9.94595	41.9048	59.2593		74.6665	93.3343			29.0907				111.999	106.666			94.5455	80	103.635		91.4286	66.6667			39.9999				60				99.9993	99.9993							47.0183				88.8889
24	41.4815	71.5447		101.819	139.999			19.0469				64.0004	106.666			80	76.3636	95.9985		11.1628	66.6667			67.6914				58.1818				108.236	117.893							21.818				37.6471
98.8352	41.2903	37.7778		84.444	73.0424			48.0005				103.998	143.998			120	70	20.4081		97.7778	66.6667			133.332				28.3876				80	62.8566							60.0002				12.1739
84.2192	40	83.8095		108.236	94.3995			133.332				106.666	74.286			91.4286	68	62.2223		57.5	65.4545			108.799				31.2195				89.7774	171.428							26.6667				34.0426
101.818	40	76.1905		239.999	94.5467			11.2347				139.999	133.332			113.035	67.3684	39.9999		80	65.4545			120				45.7143				139.999	160							84.7071				66.6667
69.7436	37.999	28.1212		128.002	66.6677			106.666				80	120			103.607	66.6667	81.7019		160	60.6897			99.9993				80				53.3332	173.334							80				67.6923
120	37.7358	33.3333		83.6363	92.0749			39.9999				48.0005	109.474			110.769	65.8824	20.4646		160	60.5405			160				64				99.9993	115.556							62.6672				96
74.2857	36.9231	69.7436		85.3345	91.4283							39.9999	39.9999			104	65.7143	106.666		133.333	60.3774			106.666				28.7179				125.715	95.9985							80				13.3333
64	35.5556	53.3333		72.7281	94.5467							59.5911	80			106.667	65.0847	80		82.449	60			80				80				124.212	116.362							34.2864				106.667
14.1176	32.8205	44.4444		160	53.3332							68.5707	64.0004			99.2	64.9029	99.9993		86.6667	59.1304			106.666				70				160	137.145							54.5457				75.4286
	32.6635	80		87.4425	19.9996							160	68.5707			12.3077	64	34.2864		133.333	58.4615			102.857				21.5385				86.762	106.666							80
	32.3077	106.667		73.3322	80							140.54	106.666			133.333	62.3729	86.6679		73.8462	58.1818			92.3089				47.0588				47.0597	142.221							95.893
	31.7241	64.3678		67.3686	91.4283							57.872	97.7792			20.7792	62.2222	71.0123		68.5714	55			66.6677				53.3333				88.8896	91.4283							120
	29.3069	17.1429		74.286	80							80	125.218			90	62.2222	30.5154		45.7143	54.3396			66.6677				52.3077				142.856	69.3324							66.6677
	27.7113	124.444		120	67.3686							133.332	76.3642			160	59.1304	29.4739		64	53.7313			160				87.2727				93.3343	88.4198							22.5458
	20.9524	59.6825		64.3906	120							95.9985	99.9993			48	57.1429	53.3332		66.8657	53.3333			120				49.0909				93.3343	160							93.9133
	19.7849	53.3333		160	23.5301							99.9993	153.849			13.0982	57.1429	111.999		43.6364	53.3333			80				80				66.6677	160							97.7792
	18.8235	57.1429		74.6665	120							80	24.3486			9.41176	56.5854	106.666		64	49.2308			73.8451				24.6154				160	122.551							80
	18.2456	80		120	61.1757							39.9999	64.0004			36	56.1404	60.0002		130	48.5714			91.4283				55.3846				121.737	118.262							97.1444
	16.5737	32.8205		58.181	128.002							60.0002	60.0002			133.333	55.8491	53.3332		84.1026	48.3516			111.999				42.3529				80	133.332							80
	16	80		133.332	106.666							74.286	120			80	55.3846	80		112	48			48.0005				54.4681				93.3343	71.795							104.617
	16	80		68.5707	80							95.9985	106.666			50.9091	53.3333	80		29.7143	48			66.6677				66.2857				113.332	117.778							120
	14.2857	39.1111		80	95.9985							80	127.274			58.6667	53.3333	133.332		26.6667	48			53.3332				80				57.1435	110.699							86.6679
	11.2088	27.0367		91.4283	109.09							80	26.6667			37.3333	48	50.9087		26.6667	48			53.3332				101.818				102.857	94.5467							29.9999
	10.566	98.4691		99.9993	115.556							64.0004	160			139.13	46.2222	62.8566		62.2222	47.8571			24.3043				120				111.999	80							133.332
	9.79592	37.3333		74.999	137.145							49.5229	64.0004			68.1481	45.7143	80		80	45.7143			99.9993				39.403				57.8316	86.4012							66.0877
	9.37238	53.3333		56.4714	111.999							133.332	93.3343			160	45.3333	80		87.0588	45.3333			160				80				110.002	120							45.7145
	8.04469	42.6667		48.0005	120							80	128.002			80	44.878	86.6679		106.667	44.4444			120				60.3774				88.4198	128.002							29.9999
	8	71.1111		106.666	115.556							28.1081	111.999			55.3846	44.4444	83.7211		100	44.4444			239.999				10.0503				102.857	93.9133							93.3343
	7.69231	106.667		60.0002	91.4283							80	128.002			80	43.6364	36.5711		64	42.7907			160				5.97015				120	75.2933							106.666
	7.67123	106.667		51.7642	110.768							60.0002	111.999			14.1176	42.9268	13.0776		66.6667	42.1053			239.999				45.7143				80	108.573							53.3332
	6.66667	53.3333		67.6914	53.3332							66.6677	106.666			160	40	122.351		91.4286	41.9048			70.0002				64				128.002	42.6658							80
	6.18026	68.5812		76.6663	64.0004							74.999	111.303			147.692	37.5904	31.429		102.857	41.0811			39.9999				64				85.7145	103.998							80
	6.01156	66.6667		80	111.999							120	71.1123			200	36.9231	93.3343		60	41.0256			60.0002				43.0769				133.332	110.002							91.4283
	6.01156	95.0725		133.332	116.925							87.2741	104.617			120	32	103.998		106.667	40			80				112				98.461	115.002							80
	5.90959	45.7143		53.3332	66.6677							80	120			97.7778	29.3333	58.181		80	40			80				7.27273				320.006	102.222							71.1123
	5.89474	53.3333		60.0002	120							53.3332	80			130	27.7686	80		101.053	40			133.332				57.1429				80	139.999							80
	5.85366	10.6004		87.2741	53.3332							111.999	133.332			74.6667	26.6667	74.999		65.4545	40			73.3322				33.1429				80	133.332							91.4283
	5.85366	126.667		89.9985	80								141.538			80	26.6667	80		112	39.0244			160				160				91.4283	133.332							57.1435
	5.71429	53.3333		75.5544	106.666								14.1177			163.478	20.9836	66.6677		34.2857	36.8485			39.9999				23.6066				120	86.6679							80
	5.26316	67.8788		106.666	11.1621								111.999			100	19.0476	111.999		26.5031	33.0667			53.3332				33.9394				111.111	60.7695							80
	5.16129	76.6667		80	91.4283								73.3322			55.9036	16.7442	92.3089		80	30.9677			28.5717				50.5263				91.4283	160							86.6679
	5	74.6667		46.6658	80								103.998			23.1405	16	106.666		120	29.4737			80				32.3404				80	101.538							120
		8.46561		80									80			20.3922	15	62.2223		25.1163	27.8261			99.9993				66.6667				99.9993	77.4199							87.6204
		60		57.1435									32.592			125.714	13.6585	93.3343		80	27.156			133.332				48				95.9985	116.362							70.0002
		53.3333		111.999									132.174			70	11.2941	120		60.8	26.6667			103.998				23.0212				74.286	31.9993							86.1536
		41.4815		116.925									123.638			102.857	10.6667	99.9993		58.1818	24.4311			160				60				111.999	80							61.1757
		53.3333		80									95.9985			102.857	10.2256	73.8451		80	24.3478			58.9466				7.04058				80	137.145							80
		80		80									80			17.7778	10.1818	99.9993		80	24			53.3332				7.04058				82.424	36.6674							95.9985
		80		55.001									38.3674			130	9.35065	93.3343		114.286	23.8889			93.3343				160				105	114.286							80
		106.667		102.857									106.666			76.5217	9.09091	88.8896		106.667	22.4561			26.6667				59.6364				131.893	80							120
		177.778		86.1536									97.7792			61.5385	6.66667	88.8896		80	22.069			53.3332				70				64.0004	320.006							106.666
		53.3333		78.4321									114.286			60.8	6.48649	133.332		50.3704	20.6829			62.2223				40.381				109.09	153.045							75.2933
		19.0786		64.3148									25			57.1429	5.6	70.0002		35.2	20.198			60.0002				26.668				128.002	50.4353							68.5707
		65.1852		60.0002									64.0004			106.667		115.556		100	20			55.1121				9.82456				111.111	31.9993							87.999
		106.667		60.0002									120			80				92.3077	18.3333			80				52.3077				103.845	42.6658							80
		62.5287		80									143.998			92.3077				76.1905	17.561			109.09				85.9259				98.1806	112.942							95.9985
		57.971		111.999									93.3343			144					16.2712			64.515				53.3333				160	101.819							62.2223
		37.9259		93.3343									54.2863			70					16			39.9999				96				115.556	133.332							160
		53.3333		83.266									99.9993			139.259					14.6667			53.3332				26.2857				128.002	80							66.6677
		74.2029		66.6677									125.001			160					13.3333			42.6658				41.5369				92.3089	113.332							53.3332
		60.2899		74.286									160			71.1111					13.3333			68.5707				66.6667				83.9995	160							67.2732
		48		106.666									120			17.1144					12.3077			120				8.37577				124.446	60.0002							160
		96		85.0009									93.3343			16.2319					10.8108			80								60.0002	80							120
		80		67.3686									80			128					6.97674			66.6677								91.4283	168.89							120
		45.7143		80									111.999			75.8974					6.80851			80								109.474	101.819							55.3843
		53.3333		87.2741									85.0009			100					6.76056			62.2223								132.174	125.001							80
		41.9048		29.7676									83.9027			105.263					6.66667			67.1994								111.111	115.199							70.0002
		44.4444		28.9154									171.428			30.1639					6.03774			89.4123								99.9993	126.665							143.998
		40		85.7145									133.332			25.8065					5.51724			48.0005								107.43	119.183							53.3332
		85.3333		72.8889									70.6984			60					5.51724			11.034								94.5467	173.334							45.7145
		32		102.857									148.57			160					5.26026			114.286								110.398	26.2686							128.002
		80		56.8425									66.6677			17.1429					5.26026			80								53.3332	73.3322							91.4283
		60.2899		60.0002									176			30.9677					5.26026			95.9985								84.8494	117.074							91.4283
		121.905		29.5231									32.34			40					5.26026			60.0002								126.22	80							80
		74.6667		70.0002									105.599			58.6667					5.26026			53.3332								136.471	139.999
		48.4848		53.3332									101.538			80								239.999								111.999	64.0004
		88.8889		42.3525									88.8896			13.5593								160								95.9985	80
		63.7548		48.0005									60.0002			102.857								48.0005								160	92.3089
		65.8785		64.0004									60.0002			80								23.9996								97.8942	80
		71.1111		31.9993									80			106.667								53.3332								113.685	44.705
		71.1111		39.9999									106.666			160								80								64.0004	27.1844
		68.5714		80									28.5717			86.1538								160								160	64.2619
		66.6667		80									213.334			44.9315								120								113.685	73.8451
		53.3333		39.9999									138.179			20.9524								66.6677								87.2741	120
		6.4574		99.9993									18.133			40.9302								73.8451								39.9999	111.999
		11.497		99.9993									160											80								124.446	93.3343
		64		39.9999									97.1444											23.9996								90.4904	120
		64		60.0002									91.8512											9.33273								51.7642	91.4283
		106.667		120									80											60.0002								128.002	19.9996
		40		39.9999									99.9993																			123.076	45.2176
		33.3333		75.2933									80																			135.998	99.046
		64		36.1298									129.997																			109.09	42.2221
		106.667		66.6677									108.236																			93.3343
		55.5556		139.999									146.669																			80
				106.666									32.592																			62.8566
				71.9995									80																			160
				34.2864									111.999																			97.7792
				80									14.3395																			160
				95.9985									39.9999																			99.1309
				82.7586									17.9994																			107.936
				106.666									80																			105.599
				64.0004									80																			98.8235
				60.0002																												66.6677
				64.0004																												133.332
				34.2864																												125.715
				80																												108.72
				58.667																												106.666
				80																												125.715
				30.4755																												85.3345
				32.3806																												99.9993
				51.1995																												108.967
				48.0005
				80
				30.77
				80
				80
				59.7019
				60.0002

## Sheet: FL displacement values (µm)
wild-type				E109I				R241L				N283R				K540C				E545V				I554M				W612C				K1475Q				R1852C				D2439K				R2543K				L2557M
1.04	1.12	1.12		0.428334	2.90196			2.21291	3.92589			0.99074	4.00001			2.84	1.92	0.719978		0.96	2.4			4.16663	5.52353			5.84	1.40471			11.9823	4.96005			0.496169	2.84776			0.959987	0.825458			1.76	6.10548			2.201	2.85415
1.44	3.36	0.96		1.16961	0.748577			0.685342	1.6			3.23864	2.39404			3.2	2.88	1.39519		0.89328	1.12			4.16663	0.959968			1.92	1.60006			5.26503	2.49939			1.25397	3.66923			0.677688	0.731196			0.64	1.12002			1.46583	1.5476
2.72	0.96	1.76		1.16961	2.08537			1.58313	1.39646			1.00013	2.12682			4.48	2.02672	0.857491		1.28	0.48			1.44338	3.35992			1.28	2.09987			2.54021	0.924708			0.681198	3.19468			1.52288	0.589105			1.06672	5.2689			0.659711	1.88173
0.8	2.56	0.96		1.16961	1.63846			0.732533	1.09386			2.13737	2.50678			1.44	2.56	1.34135		1.12	0.96			6.72009	0.665454			0.96	0.764241			1.30931	0.480041			1.61173	3.21756			0.488569	5.57348			4	4.40991			1.86712	5.17034
4.96	2.4	1.44		1.15104	1.92016			0.48006	1.28504			0.692223	0.882324			5.6	0.64	1.29168		1.76	0.96			8.0496	0.803952			0.48	1.10015			2.24	0.305923			0.608209	0.839826			4.80006	1.90112			1.6	1.76			3.20655	4.5136
1.44	2.61328	0.32		1.01441	0.873431			1.86393	1.30598			1.91245	0.716799			0.48	0.64	3.03912		0.9	2.72			12.6726	7.95609			0.72	0.460468			5.53534	2.68884			0.172016	1.62508			3.53332	1.44003			1.44	0.773936			5.91629	1.74726
3.52	2.56	1.28		2.39999	1.52853			0.725207	1.94205			0.625297	2.7317			0.64	6.72	12.9206		0.9	2.72			1.12006	1.21797			6.4	1.4136			3.44498	3.50267			2.35491	2.39952			2.2994	4.0003			0.64	0.768228			1.22302	2.37166
1.28	1.44	7.68		11.2051	0.272735			0.680916	0.541698			0.746705	2.39055			7.04	0.96	2.6129		0.96	1.28			3.32471	1.48943			0.96	1.88496			4.95805	1.56804			1.6	3.36591			1.26733	0.750408			0.8	10.2402			1.88817	3.33362
7.2	0.72	0.8		2.53353	0.426276			2.38619	0.373352			5.15241	2.05054			4.48	2.56	4.49993		1.6	1.12			1.41353	4.00019			0.96	0.824595			4.96001	2.22975			2.08005	0.746705			3.6658	1.59473			1.28	0.932924			2.88914	3.22617
3.84	1.76	0.64		2.57971	3.89554			1.579	0.634239			2.04857	1.24188			0.48	1.6	1.8496		0.8	1.12			3.58671	0.639999			1.28	12.9855			10.1033	1.38016			0.469812	0.965284			2.25271	2.4529			0.96	2.7096			1.10456	0.824076
1.92	2.72	0.96		2.90683	1.96226			0.407859	0.715113			2.45288	0.653835			0.64	0.96	13.0037		2.72	0.8			0.683569	1.10315			1.12	5.98374			5.64996	2.19783			0.824809	3.85026			7.90536	2.134			0.64	3.33264			10.6716	1.17459
2.88	2.24	0.64		3.09317	4.39128			0.694648	6.65521			0.769565	2.0039			0.76	0.96	2.10211		5.12	1.6			0.430034	6.75212			0.96	3.34062			1.92	2.89993			0.639996	1.61477			2.09752	1.9186			0.96	0.761073			1.28282	1.94616
3.84	1.6	0.7		0.844669	4.35862			2.14419	2.4965			1.91997	1.13899			1.92	1.92	1.21597		2.08	0.8			0.839518	1.7972			2.88	3.01373			0.799992	3.38339			10.8801	2.55284			0.947872	1.57079			0.96	6.57225			1.62505	10.3477
7.52	0.96	2.08		1.65975	0.960421			2.72505	0.298473			2.46617	0.959963			0.64	1.6	1.69534		0.96	0.88			1.56342	0.720004			1.12	1.43382			5.23073	0.460468			3.99999	2.58007			0.947872	8.3201			1.6	0.87998			6.69483	2.05735
1.92	0.96	0.96		5.30672	1.5871			1.97575	8.4501			4.1706	3.22292			2.08	2.72	1.86009		4	1.12			1.24288	1.06285			1.92	1.0004			0.710527	0.488285			1.92002	4.47969			8.49551	2.44721			1.6	1.77422			1.10134	0.750064
1.76	0.96	0.64		3.81359	3.02861			9.35465	0.786905			2.77073	3.16155			1.92	2.4	0.893221		6.88	2.24			0.437839	0.873431			0.48	0.566143			0.502026	0.98022			2.23992	6.10688			3.92158	1.6657			3.36	0.806009			1.01111	1.52698
8.8	1.6	11.84		1.17334	2.4149			0.719549	2.43455			1.04184	3.18216			0.64	1.76	0.799982		6.56	2.56			2.50905	0.831717			0.8	1.08811			2.45585	12.1899			1.11438	7.99995			4.91879	2.05135			2.28	0.951866			1.90015	6.78198
0.96	2.24	1.6		0.61147	0.748967			0.651143	0.53664			0.786755	1.64389			0.96	4	0.98825		0.96	1.76			1.4732	0.424264			0.48	0.550334			4.76426	1.47953			3.2114	4.01075			3.5215	1.4933			3.36	0.641261			9.17572	4.51655
1.92	0.96	0.64		0.606463	1.75995			1.00802	3.00899			1.69887	0.997263			4.16	6.24	0.665855		2.56	2.72			3.54205	8.03			1.76	1.74184			0.556076	1.80758			2.21744	4.01065			0.597764	1.44005			0.8	0.959963			7.67997	1.4093
2.4	0.96	0.48		3.36002	0.928866			1.20629	0.870236			1.0904	0.824426			2.72	3.68	0.768228		1.44	0.96			4.18159	2.21533			2.08	0.636092			1.05546	9.63801			0.963004	2.07539			2.4001	2.1042			1.76	0.998461			0.760055	5.7907
8	1.6	0.53328		1.65339	6.56441			1.8	0.439311			2.29331	0.590079			1.12	3.68	0.776334		4.68	2.24			1.75341	0.752256			1.28	1.28359			1.17959	0.917111			2.25969	2.53092			1.76473	5.32584			1.12	0.995495			0.963263	4.62028
3.04	1.92	0.16		1.08103	1.89399			0.442657	1.2791			2.8855	0.988139			0.64	4.8	3.81018		1.92	4.16			0.953102	0.824595			1.12	3.54053			3.34152	5.09431			4.46795	1.75733			0.629677	5.29271			0.8	4.03894			3.85131	0.940758
2.08	3.68	0.8		5.57075	4.11962			0.340543	10.8668			1.87781	1.33874			1.76	2.24	0.63999		4.32	1.28			1.25436	1.93764			0.48	1.23531			4.48543	8.18159			2.24009	1.92648			2.57257	1.45363			0.8	0.601324			1.07884	2.56955
0.96	3.36	3.04		2.52393	1.7707			0.731411	0.734289			0.573492	3.35301			0.64	3.36	1.18539		14.4	0.96			0.801836	0.565795			0.96	2.12021			5.58677	0.460993			1.92008				0.616471	5.27387			4.64	0.800481			4.22038	1.94884
0.56	2.24	9.65328		1.06904	0.934852			9.97447	1.45389			0.748515	1.44884			2.88	1.12	1.97451		1.28	1.6			0.545151	1.23359			1.92	0.641261			11.7598	6.22122			2.87998				0.630106	0.546431			0.64	0.672375			1.26095	3.48815
0.64	2.08	0.48		0.861913	1.0163			0.506967	0.557311			0.867862	10.7159			1.44	3.52	0.912173		3	0.96			0.475855	0.634576			0.32	0.782343			3.3081	21.5923			4.15881				1.02033	0.721136			2.4	0.921099			4.17406	1.97112
0.32	1.44	0.64		5.14658	1.78401			1.55569	0.785989			1.50721	0.706767			0.8	1.6	0.789577		0.8	0.64			1.9053	1.13094			1.76	1.50461			2.51127	4.95046			1.12002				1.94664	6.1292			1.84	1.08738			1.95688	0.482982
1.92	1.44	4		6.23997	1.90677			1.02176	1.07229			1.21628	0.872195			6.56	0.8	1.56485		0.64	2.24			0.461688	0.910772			2.24	6.88228			0.769208	0.940666			3.99947				1.07621	2.10211			4	0.946566			1.89282	0.556076
3.52	1.12	2.24		4.81854	4.14318			0.478477	0.739367			1.738	0.710143			3.2	1.28	1.89575		7.2	0.64			0.91073	1.25453			1.6	3.57954			0.77253	1.12006			1.29				2.26767	8.56458			1.04	2.71751			0.565708	4.94885
1.6	1.12	0.96		4.78887	1.77241			1.12137	0.641261			1.56441	1.1375			6.08	1.28	1.98156		0.48	0.96			1.46047	0.679954			7.12	1.28964			17.5174	8.98741			2.2449				4.05232	4.42084			0.64	0.384102			1.18479	0.923377
4.8	1.12	0.96		1.47842	14.378			1.96595	3.06003			2.67999	1.58841			1.68	2.16	0.913624		2.08	3.2			6.8795	0.659681			0.8	0.843776			6.65125	1.26912			1.12922				0.587295	3.02024			3.52	0.675042			3.98617	1.24409
0.64	6.08	1.76		0.667169	1.17334			0.508017	1.26237			1.17334	1.71038			1.12	7.36	1.89489		0.8	1.92			6.37206	3.04907			0.8	3.66463			1.49493	3.37206			1.44029				1.34755	0.704666			0.32	1.92327			1.64389	0.482982
0.48	1.92	1.6		2.17949	5.7602			1.08069	1.22483			1.44106	0.560594			0.96	1.76	2.72398		3.04	0.96			3.53294	4.00777			2.08	0.900232			4.1799	0.80378			3.03339				3.20694	0.89729			1.04	1.10315			0.872195	0.378882
2.08	0.8	0.74672		2.08317	1.40471			0.75047	1.86499			0.946731	0.750757			1.6	2.56	1.40214		0.92	3.36			0.69387	10.4627			0.64	7.85412			10.481	4.16004			2.88774				10.3715	2.00418			1.44	1.10192			4.02038	1.7381
1.36	1.6	1.44		0.769208	1.12776			0.849732	0.659681			2.08596	1.74159			1.92	4.16	3.04919		2.56	1.76			1.27321	0.521562			0.84	1.81817			12.8445	2.56308			1.11945				3.80029	5.1505			1.2	0.824595			1.09435	0.795609
0.8	0.46	0.53328		4.53974	0.607207			1.98019	0.928201			4.96385	2.03456			0.96	1.92	7.98008		0.96	1.76			0.597764	0.641261			1.76	3.12474			10.1806	4.21856			1.28729				15.0714	4.62296			0.64	0.6207			3.59448	2.75015
1.12	2.08	0.16		6.29467	1.25593			1.518	0.519271			0.506628	1.56091			0.96	0.96	4.30003		1.44	3.36			6.25599	1.22913			0.8	4.91463			0.681198	1.71315			1.27987				0.579711	7.72439			0.72	0.796339			1.53529	1.6517
1.28	1.28	2.24		9.99315	1.63932			0.665855	0.582271			1.14232	0.604159			1.44	0.48	7.18099		1.6	1.12			10.4108	1.06774			0.8	2.60205			0.653055	3.40622			2.24653				0.670111	3.97882			2.72	0.94956			2.55575	1.26712
1.44	1.28	1.76		1.55192	1.18412			0.46262	0.940795			0.808603	3.02806			3.36	0.48	8.84153		1.76	1.12			2.26497	0.866849			0.8	2.22092			4.81376	0.585517			0.800045				4.97139	4.7123			0.8	0.460468			1.44002	0.544897
5.12	1.76	5.92		6.23225	3.04713			0.340543	0.777504			0.853956	0.644995			1.44	0.96	1.75917		5.24	1.12			0.551151	4.16009			1.76	0.907659			3.49104	1.79002			1.75996				3.33731	0.740256			0.8	0.302606			1.02451	5.37865
0.64	4	7.68		7.79094	13.7814			0.320383	2.24625			2.12423	1.46117			1.12	0.96	1.04391		0.96	1.12			2.05491	1.68659			1.44	1.6367			1.13184	2.15861			0.479922				1.20401	0.765661			1	4.4588			0.982752	1.08957
2.08	1.76	0.96		1.62681	3.15712			0.522433	0.695341			2.08193	1.84768			1.28	0.48	3.52003		3.52	2.24			1.34724	1.08069			1.44	0.799982			6.16636	1.91994			0.639726				0.714827	1.60902			0.8	1.74887			0.838292	3.838
0.6	0.48	0.48		3.72118	0.748869			0.319952	1.50354			2.10867	2.62555			0.96	1.92	2.3227		1.76	0.8			2.22899	1.90093			2.4	1.15999			0.783865	15.9804			0.640192				2.21224	1.00002			2.24	0.648173			2.37834	1.10159
4.8	0.96	2.08		3.71453	1.45499			0.680319	4.02149			1.16305	2.12328			8.16	7.36	0.789577		2.4	1.6			2.2565	0.503573			1.6	2.66761			2.0372	2.23964			1.76028				0.920257	3.48021			2.88	1.53734			2.57226	0.994465
3.68	1.92	2.72		1.25397	4.88708			0.377086	0.903014			0.589046	2.1775			2.72	1.6	2.39997		3.36	3.68			1.03459	5.7972			1.76	1.41348			4.16152	2.61739			1.7648				3.70695	1.15197			0.72	1.14367			2.5791	4.37437
0.96	2.4	3.52		3.81496	0.704377			0.285164	1.11971			0.599476	1.33874			0.96	1.6	1.86981		0.64	0.72			3.32127	4.1061			0.96	2.90594			0.48006	8.70286			1.44				1.06253	1.90367			0.88	0.614655			7.67264	3.46741
0.8	0.48	2.08		0.830539	0.840032			11.0155	1.36683			0.799995	1.9516			1.92	3.2	0.742406		0.68	1.28			0.606463	4.18			4.8	5.54992			3.8956	2.47752			0.160027				0.57687	2.42431			2.08	0.789577			6.41997	1.57542
1.76	0.48	0.64		2.32668	1.0937			2.22077	1.59548			3.96823	0.941615			5.12	3.2	1.02522		1.92	1.28			0.914731	0.521562			3.84	2.06017			5.46666	1.79584			0.160028				3.59737	1.44005			0.48	0.931779			5.51386	2.24068
0.64	2.56	2.13328		4.81439	2.88378			0.767873	0.876873			0.942509	1.59084			0.64	2.72	1.7719		0.8	2.56			0.510813	1.77979			0.96	0.987811			3.12032	4.17429			1.44026				2.84474	3.56401			0.32	2.43482			1.59049	0.903139
1.92	9.97328	4		0.799982	1.42722			1.22101	0.709061			1.75995	1.80759			2.24	1.12	1.39782		0.96	1.76			0.766073	0.621311			1.12	1.55569			4.84461	3.86988			1.12002				2.49277	1.64037			1.22672	0.730183			3.06313	3.14956
3.04	3.2	2.56		2.27669	2.0945			1.13271	0.629677			1.74542	1.32239			0.48	2.66672	2.28596		0.8	1.92			0.699861	1.48225			0.96	1.44472			0.683235	1.80022							0.837881	3.17107			0.8	5.91625			1.4033	2.72005
1.44	2.72	2.4		0.428334	4.01754			3.21211	0.953102			1.2134	0.615295			0.8	2.88	1.50688		0.8	3.36			2.23584	3.50429			1.6	5.62376			3.38916	3.80909							4.51198	0.750757			0.8	2.20466			0.77502	2.61386
1.12	1.12	0.8		1.16961	1.97557			0.981438	3.85668			1.46294	0.868824			1.92	2.88	8.47996		1.76	0.96			1.06666	0.684799			1.12	2.08951			1.44571	3.73895							1.09829	5.27996			0.8	0.863857			4.98028	5.86852
2.72	1.12	1.12		1.16961	1.30143			1.59874	1.59995			1.35161	0.971391			1.28	1.76	1.87409		0.64	1.92			1.26179	6.89659			1.76	3.37783			0.636415	0.865377							3.96239	3.82865			0.69328	0.681198			0.908395	1.76353
3.36	4.16	0.48		1.16961	0.959968			1.77223	2.15809			1.32899	4.35011			7.36	1.76	3.04		0.48	0.96			2.42081	2.39956			1.76	2.12702			2.00576	2.98707							3.05235	1.11149			0.8	0.967154			0.88544	0.533328
1.6	19.2	0.96		1.15104	0.813456			0.520204	2.10073			0.589046	4.56166			1.6	5.28	3.14396		5.44	0.96			0.454132	2.75013			1.28	9.42002			2.26294	3.63364							0.960002	9.30615			1.28	0.329891			0.541698	0.674559
2.72	0.76	1.12		1.01441	1.21461			1.45269	2.87507			0.961545	1.82901			3.68	1.76	1.32001		1.76	1.44			1.77826	0.38048			2.24	5.96252			0.826594	0.740256							0.603307	4.06538			1.76	0.799992			1.63939	0.965839
0.48	1.28	0.96		2.39999	4.26296			0.394991	2.87507			0.668316	1.11177			1.6	3.68	0.799992		1.33328	0.96			1.0274	0.480041			5.56	4.01398			0.573492	4.37357							1.55628	2.1829			0.48	0.947584			4.15994	1.68568
1.28	1.28	1.06672		11.2051	1.44074			1.90447	0.360228			1.1213	2.90608			12	3.68	1.44057		1.12	1.44			1.00802	3.4259			2.72	0.605847			2.44982	1.24121							4.3301	1.05591			0.64	0.636092			2.37867	0.966969
1.76	0.64	1.12		2.53353	1.60538			1.28003	0.568324			3.7345	2.86032			2.88	0.64	2.18006		1	1.92			0.973238	0.64499			2.56	1.51275			0.949393	2.27199							3.63118	5.87093			0.8	0.799988			2.6758	0.88544
2.72	0.64	1.6		2.57971	1.57073			0.503715	0.400845			4.24527	1.06774			1.6	0.64	0.76477		2.56	0.76			0.607207	3.20603			2.24	0.566526			3.15274	12.5539							3.85753	0.480041			0.64	0.536044			4.00004	1.71211
2.64	1.28	0.48		2.90683	0.303531			0.801803	2.57932			0.762684	2.4678			2.88	0.64	0.961379		0.64	2.08			8.64417	1.47117			4.16	3.06002			3.87671	6.73833							7.46889	1.60002			0.48				1.13452	1.11702
2	0.64	3.04		3.09317	5.0629			0.175512	2.36411			3.24687	0.400845			1.76	3.84	3.37864		2.4	2.72			0.430034	1.69426			4.16	1.56427			1.33558	0.860181							7.64364	0.460355			2.08				0.640016	0.686868
8	0.64	1.01328		0.844669	3.70515			2.92264	1.5605			4.37782	1.45243			1.92	2.56	7.03997		1.28	1.12			5.21512	0.803952			11.2	1.2464			2.52535	2.5615							1.6141	1.60529			1.6				3.37899	2.29911
1.41328	0.64	3.68		1.65975	1.31119			6.48547	1.03248			1.16238	1.58049			0.8	1.28	0.614303		0.96	1.12			30.056	1.27835			0.96	2.61602			3.72002	1.93308							1.62916	2.69382			0.66672				7.03997	5.43998
1.44	0.76	0.96		5.30672	0.800005			1.69799	0.879311			4.62526	2.07272			0.64	1.28	1.30457		3.68	1.12			1.18737	8.02774			0.64	0.473004			3.09746	10.3544							1.20521	4.32634			0.64				1.62534	1.08957
6.72	2.08	2.4		3.81359	0.932163			3.16433	2.23486			0.600192	0.723036			1.12	1.92	1.66421		4.16	2.56			1.17211	0.465985			1.12	0.981804			4.18998	2.91046							0.6915	9.02503			0.8				1.09386	0.737072
0.8	2.08	1.44		1.17334	0.78848			2.21904	0.753083			1.7835	1.65603			1.92	6.4	1.31045		1.12	2.4			1.76486	0.953597			1.44	3.21897			3.17736	1.11996							2.88667	1.52215			1.49328				1.92674	2.96925
0.8	1.44	4.96		0.61147	0.960042			2.58853	3.78263			3.77494	4.23706			1.17328	0.48	1.62208		3.36	2.4			9.80023	0.987811			12.48	3.16584			0.984511	5.40814							0.878646	0.640016			0.96				0.815342	13.8129
0.64	1.44	1.28		0.606463	0.944012			4.89294	2.2471			0.720004	1.78213			1.28	0.64	1.50354		0.8	3.04			1.26666	0.936155			0.8	0.764241			2.72184	7.49999							0.548149	1.11994			0.32				0.800005	8.25331
5.92	2.24	2.24		3.36002	3.03437			0.885844	0.4418			0.480001	6.41966			0.96	2.56	1.06606		0.96	0.64			1.50435	1.34011			0.8	3.62303			2.07469	8.58504							2.74414	5.14215			0.8				0.9817	1.62469
1.30672	4.16	0.8		1.65339	1.74517			2.50195	0.662757			0.432289	0.883572			0.64	3.84	1.10165		1.6	0.64			9.78899	1.58685			0.48	1.54772			2.41242	0.852733							0.583109	6.04806			2.56				0.785916	2.97891
0.64	1.25328	3.84		1.08103	1.91932			1.14348	0.676929			2.42381	1.42377			0.64	0.64	0.821369		1.28	0.64			1.1267	8.61074			0.48	1.62288			1.0731	2.0352							0.721136	1.86855			0.64				1.302	2.87999
0.64	3.36	0.64		5.57075	2.57943			1.25792	12.6356			0.601324	0.787114			2.08	5.28	0.850631		1.08	0.64			1.62966	3.82005			4.8	2.56807			2.61717	1.61906							6.88515	2.09392			5.12				6.01941	4.59045
0.53328	1.8	0.48		2.52393	0.918172			1.05954	1.28			4.45439	1.08811			2.08	2.72	5.03668		0.8	0.64			2.02524	6.29829			0.44	9.91234			5.41392	0.96488							5.956	1.60006			1.2				3.0698	1.75522
1.6	1.76	2.08		1.06904	6.46464			1.0963	3.28145			0.659816	1.48006			4.16	2.72	8.93391		0.64	0.64			1.72281	0.508325			4.16	2.22032			2.77362	2.2017							2.33305	2.07154			3.2				0.77462	5.76
2.88	10.24	1.12		0.861913	2.5377			0.492707	1.53696			2.30518	2.24725			0.8	8.96	2.06791		1.28	1.92			0.739387	1.81617			0.8	2.00236			3.90914	1.61973							0.504098	4.42713			4.48				8.3754	2.69495
0.64	3.46672	0.53328		5.14658	0.7771			0.48858	23.7802			1.08103	4.00006			0.96	2.08	0.556262		0.76	6.4			0.627911	1.10162			0.8	1.44002			4.90727	0.605283							2.43052	8.6858			0.96				0.488657	1.57434
0.48	2.88	0.8		6.23997	1.98867			1.91877	2.7467			0.456508	4.21616			4.32	2.08	0.418688		1.76	6.4			1.6862	0.665994			2.08	1.60323			3.11112	2.9806							0.656725	4.24004			2.72				0.466507	2.26423
3.04	1.92	0.85328		4.81854	3.75981			1.77255	2.71995			0.86617	6.83424			3.04	1.44	0.76107		2.4	5.44			0.634239	0.632466			7.28	2.03568			0.906681	2.27945							2.98168	6.24382			0.64				8.4566	1.60002
5.6	0.96	0.96		4.78887	1.07839			1.10524	0.957855			1.17436	1.7289			4.8	2.24	8.66927		0.96	5.44			0.819624	6.37981			0.96	1.73464			8.28841	2.84361							4.16464	1.28388			0.64				3.52516	1.38774
1.28	3.04	1.28		1.47842	2.12518			1.2891	0.756129			0.922407	5.49551			5.76	4.48	1.28504		0.88	1.44			0.732091	0.605847			0.64	2.4059			4.50442	8.60771							8.66203	1.46669			3.84				0.774067	0.319952
1.76	0.66	0.58672		0.667169	1.39065			1.73095	0.874503			1.09209	2.76181			2.08	3.84	14.1366		1.6	7.68			0.914943	2.5834			2.72	2.23373			0.580393	3.72819							1.23595	1.06666			0.64				4.96675	1.17255
1.28	4.32	5.44		2.17949	5.57695			1.6619	1.78857			0.786833	0.909691			4	7.84	1.22074		6.4	0.8			3.52277	2.39997			0.8	1.09046			0.580393	5.38957							13.9474	1.92073			1.12				1.78984	0.674559
2.34672	5.04	4		2.08317	12.9301			0.94268	0.954555			1.14861	4.19947			3.68	0.8	1.0937		7.04	0.8			0.799982	11.0806			1.12	0.984791			1.10134	1.23049							0.496435	3.79136			1.6				1.23072	5.52818
5.84	2.4	4.96		0.769208	4.62566			3.51546	0.945231			0.699775	0.798138			17.12	0.8	1.59459		5.44	0.8			1.06296	0.78052			1.6	3.04002			0.508017	3.09004							1.26292	4.31337			0.8				1.29588	1.28
1.28	1.28	1.28		4.53974	4.33942			0.4418	2.04705			2.81619	5.04646			3.04	0.8	1.24608		2.08	0.8			1.72305	1.88045			2.4	0.96776			2.32889	3.28113							5.73394	3.65356			1.44				1.43996	0.568324
4.05328	1.44	8.16		6.29467	6.28102			2.53085	2.68637			0.982296	2.35784			1.6	1.6	1.07049		0.8	0.8			1.44397	0.885205			1.6	1.23278			3.79274	2.84872							3.04005	2.7968			0.8				0.615295	3.5226
1.12	1.6	1.12		9.99315	2.98477			0.521562	0.641261			0.593151	0.748459			2.08	1.6	1.03728		0.96	8			0.810977	0.622933			1.49328	0.475681			0.976572	5.79733							0.639982	0.961961			0.96				0.636492	1.14698
0.77328	0.6	2.24		1.55192	1.35172			0.444968	0.639996			1.91693	1.1607			2.08	10.08	0.799978		1.28	1.6			2.19635	0.614655			0.64	0.970413			4.94053	2.26409							6.24001	0.517469			0.53328				2.44982	2.61007
3.68	0.52	5.92		6.23225	0.970142			0.420001	1.11591			1.76008	5.13586			2.88	6.88	4.99961		4.32	2.56			0.905405	1.93155			0.74672	1.00741			1.26196	2.54219							6.69347	0.699775			1.12				0.666495	2.3735
2.24	4.32	2.88		7.79094	1.39866			1.13694	1.84696			0.474868	1.15978			8	3.52	3.22643		1.76	5.44			0.536044	1.77652			1.6	1.15104			0.620331	5.97956							0.799992	1.57351			1.12				1.89451	7.04
1.44	4.64	3.68		1.62681	3.21211			4.56559	0.320001			7.81341	4.78156			1.92	1.76	1.44494		2.08	0.96			1.26297	3.46007			1.76	2.26671			0.519978	4.22637							1.52552	0.674559			0.96				2.37483	2.69363
1.76	0.32	1.76		3.72118	2.98982			1.84352	0.832966			5.76998	0.48006			2.4	2.72	9.64647		0.48	0.96			1.10842	1.55786			3.36	0.898482			3.75483	0.843961							0.795609	2.0802			0.64				5.47306	2.00852
3.2	0.8	1.6		3.71453	3.62623			0.780306	4.61757			0.759679	4.20128			1.92	5.44	5.61668		1.76	0.96			4.69727	6.3606			0.96	0.972477			1.16282	11.8592							4.32842	6.52802			0.64				1.26301	2.83237
0.8	0.64	6.4		1.25397	1.47877			0.736639	1.97339			0.941615	1.59998			0.64	1.92	1.25036		1.76	0.96			3.65403	4.3587			4.8	1.14664			2.19269	0.876424							0.851218	1.81025			0.42672				1.09636	4.48002
0.48	3.36	1.44		3.81496	0.972477			3.51999	1.1213			4.89842	1.45331			2.08	0.96	8.8041		2.88	0.96			2.02772	1.08996			4	3.63008			2.84409	4.22338							2.12042	0.734079			0.69328				0.29581	0.642166
0.77328	2.72	3.84		0.830539	23.388			0.880885	1.51888			2.67925	0.816002			1.6	0.96	2.34847		1.28	2.98672			0.963036	6.25718			3.52	1.38774			4.18081	3.7762							1.11331	0.800002			0.66672				1.57696	2.40006
3.04	0.64	3.52		2.32668	1.81181			1.26912	1.06666			0.506628	0.590814			1.6	0.96	0.986669		1.44	1.12			0.50742	1.46128			1.28	2.15622			8.29059	2.6719							1.68573	4.29794			1.06672				2.58467	1.06904
9.57328	1.44	2.56		4.81439	0.386929			0.786677	0.87053			0.346652	0.461688			1.28	1.92	0.97014		10.4	1.12			0.440388	1.18287			0.32	2.82409			0.76477	3.76671							13.8208	0.934562			1.6				0.63117	9.03908
3.04	0.8	1.76		0.799982	0.534007			1.26012	4.94994			0.42664	0.892491			0.48	0.96	4.11771		1.92	2.24			0.465121	3.52222			0.96	1.22788			0.462354	2.01642							5.69609	1.44003			0.8				2.39981	5.1532
5.44	0.48	0.42672		2.27669	9.27969			1.51503	0.704306			0.820597	1.04606			2.08	5.92	8.03962		6.24	1.12			0.869354	6.59844			3.2	7.22985			0.494837	2.62447							1.30719	1.73424			1.44				3.52017	9.44876
9.52	0.8	5.92		5.28	0.905405			1.03668	2.11214			0.874189	0.734373			2.56	3.2	6.1471		1.44	4.48			3.08706	1.7731			0.8	0.454132			2.33653	5.77919							0.914177	2.10602			0.96					2.26369
10.88	3.84	1.12		3.67996	3.8426			0.657151				0.933906	0.831423			1.44	2.88	0.932657		1.28	4.8			3.64062	0.601809			0.64	3.54673			0.689366	2.9807							0.985136	6.58673			1.2					1.88608
2.56	0.48	0.48		11.066	0.761073			1.64465				2.2161	0.939813			5.92	3.52	0.410292		0.96	1.28			3.45351	3.18614			1.92	0.533328			1.86918	1.03078							0.451235	1.755			0.96					2.04811
1.92	1.76	2.88		3.14949	0.63999			9.93129				0.453121	1.18062			4.48	2.4	0.533444		0.96	1.6			1.01773	3.39807			1.92	0.913713			0.891131	5.24129							0.64496	3.81117			2.82672					4.61339
8.56	0.38672	2.24		1.11994	0.319987			0.986022				0.494975	0.465672			0.96	3.68	3.90984		8.64	1.6			0.53644	0.526256			1.76	1.46526			1.00618	3.33609							0.751532	7.14664			2.72					2.85807
2.24	2.08	0.8		1.14573	0.319984			1.14573				0.761365	1.56173			3.52	1.28	2.39997		3.68	1.6			3.39202	1.04629			0.48	1.11149			15.4203	11.3717							0.951335	3.67494			1.38672					2.34885
15.52	6.08	1.12		4.45342	0.332166			1.14573				3.08001	1.50315			4.8	3.84	1.49409		12.24	3.2			0.866743	1.22944			0.64	2.04049			1.10179	0.284183							0.413063	4.80117			0.48					1.49914
1.92	1.4	2.88		1.84702	1.10863			0.811044				1.71633	0.827145			3.04	1.44	2.09242		0.64	1.92			1.26552	2.54011			1.76	4.03299			2.88143	7.2021							10.5738	0.580351			1.28					1.79179
8.8	1.28	2.88		0.663679	0.814834			0.789226				1.07621	1.59495			2.08	2.88	5.84554		0.8	4.16			2.4216	1.09939			1.44	7.00522			1.80665	4.94966							0.962823	0.822311			0.48					0.830539
0.8	1.28	0.64		1.44357	0.63006			1.00339				1.6327	1.18437			1.12	1.6	2.1285		0.48	2.08			0.82839	1.79568			0.48	1.00081			0.720004	0.985085							2.64626	2.88002			0.48					8.78019
8.56	1.12	3.04		0.758088	0.672375			0.374257				0.674559	0.7738			3.36	1.6	4.68011		0.76	2.56			0.773745	4.14212			0.96	3.44185			6.53454	10.1026							0.959968	1.62691			0.64					4.45341
8.8	1.12	3.68		0.681082	5.37146			0.693304				0.642998	1.41123			1.6	1.6	1.56918		0.48	2.88			1.8056	0.809596			7.36	11.4825			3.08105	3.21072							0.845358	2.08688			0.96					0.773745
1.44	1.76	8.16		2.37393	1.4201			0.526154				3.85353	1.13014			0.53328	1.6	4.5201		0.6	3.36			0.561414	0.960873			4.16	5.26812			2.64964	2.54072							1.10928	2.22424			0.90672					2.87178
3.04	0.8	2.56		1.64811	2.54072			0.605576				2.70504	1.16275			4.32	7.36	2.38675		1.6	5.28			0.413063	2.36758			4.32	0.799992			3.84003	2.15877							0.913624	0.650669			1.44					1.24608
8.16	0.8	2.66672		2.90985	0.840948			4.03224				0.437338	0.616602			1.28	1.92	2.08003		2.56	1.44			0.428887	7.10936			2.56	2.23997			1.55509	1.77831							1.56373	1.57607			1.6					0.49466
1.6	1.44	0.8		1.46683	2.19088			0.429004				4.61446	0.466804			3.36	2.08	0.954242		4.58	1.6			0.533444	0.840043			0.96	1.11508			0.601324	1.86499							0.681198	3.86175			1.28					1.7527
1.76	0.64	2.4		0.66128	0.859549			2.14812				0.639231	0.680319			2.08	2.08	0.770747		0.8	1.44			0.582308	3.01923			0.96	2.88004			4.78981	0.503573							2.65046	0.77462			1.33328					0.49466
1.6	2.56	3.41328		1.56268	2.4803			1.90999				0.936157	0.335393			1.12	2.08	0.756607		2.56	0.64			0.887565	1.74748			2.4	1.17436			1.73247	7.00144							4.42327	2.57902			0.8					0.799992
2.08	0.64	1.44		0.469306	2.41907			1.12484				0.486593	0.813456			0.64	4.8	1.54664		0.8	1.44			0.756129	1.04075			1.12	2.24001			10.6313	1.56173							6.74425	0.959963			1.28
3.52	2.56	3.84		2.23474	4.2599			1.65449				1.98669	0.826594			1.12	2.72	1.49213		1.12	0.64			0.440443	3.05745			2.4	4.16695			0.615509	12.0179							0.294612	2.18537			2.24
1.76	0.64	4.16		0.950012	2.51758			1.90015				1.41295	0.979261			1.28	2.88	0.443716		2.08	0.64			1.51486	1.12382			8.48	0.951371			4.75387	8.14062							0.639999	0.977294			0.69328
1.76	5.28	1.92		0.890049	5.56703			0.959987				1.2401	0.430803			0.96	3.52	0.78766		0.85328	0.64			0.479999	0.472207			5.44	0.771793			8.54942	1.76001							0.733355	7.67995			0.96
4.32	1.12	1.28		1.57702	3.33698			1.34397				0.600909	0.633568			1.76	4	0.644427		1.76	0.64			1.18416	3.66527			1.6	1.78213			3.18246	1.01111							0.331379	1.52022			1.12
2.24	3.36	2.96		2.16081	2.1666			1.09365				1.92	1.93886			3.04	4.16	2.91858		3.52	0.48			1.16248	3.21616			1.12	3.48052			0.499231	7.15434							16.89	3.0483			0.32
0.52	7.04	2.24		0.881667	1.30017			0.648365				6.42408	0.99074			1.28	4.4	1.38759		1.6	5.6			1.41098	0.959987			1.76	1.28			6.49783	2.86011							1.16464	2.29329			1.12
2.56	6.18672	14.24		2.27266	1.11995			0.959987				0.636492	1.40112			0.64	9.44	2.47497		3.2	2.28			3.39948	0.987811			3.2	0.840948			2.39995	0.814475							0.530839	0.85328			1.12
2.72	0.48	1.36		4.56549	1.72708			1.00323				0.898482	6.28221			4.58672	0.32	0.780522		2.56	3.04			5.49353	4.97554			2.88	1.27998			11.8822	3.82629							0.782855	4.6634			2.08
4.32	1.44	5.12		3.78118	2.23516			0.566143				0.509456	3.38945			1.6	0.8	1.7213		1.44	3.84			1.44004				3.04	1.24066			2.73947	1.4763							5.2599	3.1921			0.96
2.4	1.44	5.76		0.947963	3.36269			0.452636				1.74672	0.798138			1.30672	1.76	0.674603		1.28	7.68			0.713442				0.48	0.959987			0.702591	1.75406							2.2836	0.832966			0.8
2.4	2.08	0.96		1.29674	3.46272			0.963387				8.97773	0.739387			3.84	0.8	0.583018		3.2	1.76			0.827206				3.04	1.60001			2.9686	1.93551							3.0695	0.471673			0.48
1.76	0.8	1.76		5.89849	1.87315			1.00002				1.39817	3.18802			6.4	0.48	6.88		4	1.44			1.27997				0.96	0.799996			14.3999	0.908467							6.1467	1.00163			0.96
0.66672	3.04	1.12		3.90666	2.41481			1.12003				0.954396	2.31334			2.88	0.8	3.03761		0.90672	1.44			0.851497				0.48	0.815596			2.55992	0.640862							1.39453	2.06188			1.12
7.68	1.12	3.52		2.10167	5.27803			0.377797				0.822167	0.819624			1.28	0.48	1.74921		0.96	1.44			0.793245				2.08	0.799992			1.44003	3.57238							1.93283	2.00015			1.12
0.96	4.8	2.56		1.13362	0.665639			1.03135				1.61269	1.18331			0.96	3.52	3.39799		1.12	2.56			1.41716				0.74672				2.00418	1.14326							2.17768	0.824595			0.64
1.76	0.64	4		2.45723	1.7976			1.44003				1.76538	2.40001			4.64	1.12	1.76674		1.12	8.8			0.969306				1.6				4.34681	3.99287							4.19158	3.09052			0.64
0.64	1.6	1.92		0.960042	0.432673			1.56091				2.08649	1.12263			2.10672	0.48	0.576383		1.44	6.24			0.770577				3.04				2.17883	1.62549							1.43907	0.853355			0.48
1.12	1.76	3.2		9.88004	7.01695			0.541698				3.35848	0.616602			2.56	5.92	3.47758		4.64	1.12			1.17294				1.12				1.00618	0.93965							1.34067				0.48
1.28	1.44	1.36		5.76981	2.57477			0.799971				1.79974	1.4708			0.56	2.08	2.85343		1.44	3.2			1.1402				0.32				2.2735	2.23005							1.76851				0.8
1.28	0.48	0.64		4.19969	5.86314			1.09508				5.48315	5.39619			1.92	1.12	3.1882		6.08	3.04			1.5927				0.8				0.426276	3.67383							2.51648				1.12
0.64	9.92	1.76		4.73015	2.30603			0.70438				1.06564	3.44593			1.6	2.88	1.01001		2.56	0.96			6.20083				1.28				2.80003	1.75986							5.05748				2.08
0.96	0.96	0.8		3.49906	3.32871			0.430034				0.917253	14.9256			1.28	8.48	1.91993		8	0.8			0.780306				2.72				3.17569	2.57256							2.3886				2.08
1.92	1.6	7.68		0.892765	4.19538			1.09033				0.902316	3.32471			5.6	0.64	2.23114		0.64	3.2			0.751711				1.44				1.10281	1.27998							9.74102				3.52
1.44	1.6	2.08		4.08357	7.86914			0.957994				0.880433	2.506			4.32	3.04	2.8949		1.28	0.8			0.969934				1.6				2.68646	0.826594							4.36349				0.96
3.68	1.76	1.6		4.48747	1.16683			0.633998				1.10238	0.606463			2.08	1.28	9.05701		1.28	0.8			1.09835				0.48				7.16648	1.62208							10.7654				1.6
2.4	2.24	8.8		2.287	1.16747			1.59994				0.66128	0.576383			0.48	3.36	1.91759		0.96	1.6			1.70062				1.28				10.9819	4.51655							0.980305				1.28
0.56	2.56	5.44		6.18382	3.34014			0.466507				2.17279	1.38718			4.32	2.24	3.99036		1.76	0.8			0.832658				4.10672				1.20005	1.77625							0.446401				1.12
1.06672	0.96	3.52		3.61031	9.48662			0.715765				0.680319	2.11746			1.28	2.72	1.14036		3.68	2.88			5.41409				1.28				16.1154	2.31272							0.484159				1.6
2.24	0.64	1.6		0.527164	4.13354			5.28562				1.10871	0.870662			1.73328	2.56	1.58936		0.64	2.88			0.946142				1.28				1.15025	2.17611							20.0567				0.8
5.44	1.01328	4.64		1.28231	0.761365			1.28				3.00028	3.28094			12.64	0.8	7.69315		0.64	3.52			0.750007				0.64				0.395035	2.05737							2.24147				0.44
0.48	4	1.6		3.66003	9.70086			0.512255				0.472105	4.11254			2.88	2.24	1.79693		0.64	4.48			0.952243				3.84				0.840962	2.11626							7.48967				0.96
2.08	0.96	5.44		2.60125	1.30286							2.74138	4.28265			2.08	3.68	1.27603		0.6	6.4			0.694655				2.24				1.75023	3.87157							0.640016				0.8
0.64	0.64	1.12		1.58892	2.01376							11.6958	0.521562			1.92	7.68	0.381838		5.38672	3.36			0.616597				0.64				9.43218	2.63283							2.38555				0.64
2.88	2.56	0.8		0.694648	0.308235							0.982012	0.636492			4.96	2.29328	0.816349		2.08	2.72			3.27731				2.24				1.02509	1.89728							4.82551				1.32
	9.97328	0.48		14.9866	1.58821							0.663164	1.91831			3.84	0.64	1.95728		0.8	3.04			1.52414				2.24				12.3634	0.666495							0.480041
	1.68	0.96		5.20541	1.44227							10.3342	2.6711			1.6	7.36	2.15305		1.92	1.28			2.3574				1.6				4.75486	2.47945							28.9835
	3.68	5.6		2.66065	1.19882							5.41817	1.76005			1.6	1.12	12.6783		0.96	1.76			0.799982				4.16				1.62217	2.58657							0.822066
	5.92	0.72		2.1756	0.981804							0.840948	5.70917			1.44	3.36	5.94456		0.64	5.76			0.742621				2.72				4.12548	2.03069							0.711994
	7.54672	1.12		0.48006	2.50399							0.805492	3.29419			0.96	5.44	1.14863		1.28	7.2			0.584025				1.92				1.16282	3.30414							4.97513
	1.76	0.94		5.20951	0.905405							1.93099	1.6878			3.84	0.8	0.320039		8.96	0.96			0.893822				4.32				1.12006	1.36597							4.32362
	3.68	1.92		0.675042	0.789184							0.751131	4.03195			5.2	1.6	1.0352		0.96	0.64			3.52003				2.08				0.744362	6.46406							1.77974
	0.64	2.4		2.25874	1.80003							0.465672	1.11227			1.6	2.32	1.28		0.64	1.28			1.96928				1.92				0.595474	11.5444							1.90014
	2.08	0.96		1.85581	6.32734							0.334157	1.27418			1.44	6.4	0.975362		2.08	2.72			3.79081				0.72				11.2183	5.36702							2.72005
	1.04	1.28		1.36473	1.22913							3.35041	0.499873			0.8	5.92	0.609193		6.56	8.8			1.07464				0.72				0.561386	3.12195							3.52003
	0.16	0.96		0.800005	0.658943							2.10483	0.928968			0.96	2.88	0.589105		2.24	0.96			1.42957				5.12				2.28653	5.65031							2.60576
	0.64	0.96		1.00482	0.540343							0.991798	1.23699			2.24	0.32	0.648841		2.08	12.48			1.65425				2.32				5.50451	8.46753							0.941882
	1.6	1.76		0.640016	1.94365							0.813456	5.6798			3.52	0.32	0.879717		2.56	0.48			0.668035				0.64				0.767612	18.9798							2.05852
	4.08	3.89328		1.24121	2.43869							0.509456	0.143593			2.24	0.48	1.07211		0.96	1.44			0.633955				2.24				4.3643	2.11758							0.435617
	1.12	1.28		1.57198	2.07219							0.629695	0.589034			6.4	4.16	3.54598		4.48	10.72			3.84733				0.96				1.10134	4.32003							0.800005
	0.96	1.12		4.76271	1.96735							2.07996	1.89658			3.68	0.64	0.987008		2.08	1.28			0.75388				5.28				9.63801	4.34671							3.11177
	4.48	4.64		1.92005	2.32011							0.837323	1.08143			2.24	2.72	1.33332		5.92	2.72			0.865377				0.96				5.26651	1.89574							1.90066
	2.88	0.64		2.35822	0.978891							0.346652	1.33591			1.28	3.68	2.10896		0.64	0.8			0.918851				12.8				3.42647	2.59841							0.479999
	0.16	0.64		1.24966	2.08548							2.04901	1.13167			1.44	1.6	7.22667		0.8	0.8			0.55312				4				1.46504	4.35627							1.12261
	0.8	1.92		0.460993	1.29997							0.506628	1.24541			1.28	0.96	2.54922		3.84	3.68			0.592469				2.4				8.0677	2.50831							2.53222
	1.12	0.64		1.69354	2.82413							0.454849	1.21591			2.88	3.52	2.72012		0.8	1.6			0.505155				1.28				0.902042	6.08947							0.702737
	0.96	0.48		1.77679	0.960029							0.762902	0.674559			1.92	0.32	4.18456		1.28	5.28			1.14643				0.64				1.33021	2.53669							6.94696
	2.88	0.48		3.73916	0.569824							2.42464	5.18545			7.68	6.24	5.30933		1.44	3.04			5.86407				0.64				2.40254	6.33284							0.613316
	2.08	0.8		2.06011	1.0835							0.949736	2.61337			2.4	2.88	1.12589		0.48	3.2			0.998882				2.24				1.56091	1.77056							1.29202
	2.08	1.64		0.830325	3.07781							1.89126	2.69956			0.96	0.32	2.10609		0.64	0.32			0.444063				1.12				2.52802	3.69147							3.02811
	2.68	0.96		0.696702	0.761365							0.640582	1.34326			1.76	3.52	1.30545		2.56	0.64			0.340543				2.88				0.7207	3.71312							1.24785
	1.12	1.76		1.40189	1.39385							0.642209	1.38774			1.04	6.72	2.80014		3.84	1.6			2.44515				0.8				0.50742	1.10454							1.64004
	1.92	5.12		1.96037	0.648066							1.0904	3.20427			1.12	1.44	2.35066		1.44	6.08			1.81612				4.64				0.533328	0.800005							1.27721
	0.48	0.76		2.79553	0.580393								3.68296			1.12	0.48	0.773745		1.12	3.2			0.648138				0.64				1.27745	0.750064							0.864238
	2.72	1.28		5.34233	0.595199								2.90445			7.52	2.56	0.725924		0.48	12.16			0.282853				2.88				1.44005	2.05358							2.54694
	0.8	2.24		0.639999	1.90894								1.03728			0.8	1.6	1.14573		8.64	4.96			0.63999				2.24				4.00001	12.6339							0.773745
	0.32	0.92		0.620331	1.30286								1.78671			9.28	1.44	2.48351		0.64	1.92			2.35803				1.92				5.17327	2.85945							2.07851
	0.48	1.12		5.62031	0.34767								2.16544			5.6	0.64	1.97235		0.96	3.36			1.20152				3.04				1.0403	5.28							0.502026
		1.6		2.88002									0.747157			4.16	0.48	1.14606		4.32	1.28			0.697408				4				1.66581	4.77339							3.6908
		1.44		0.864982									1.75999			3.52	1.12	1.15104		0.48	11.84			0.827856				1.92				3.82006	2.52393							1.1085
		1.12		1.07464									6.1236			2.24	1.92	1.89574		3.04	0.64			2.05498				2.13328				2.08251	1.64413							2.24457
		1.12		3.00321									2.60348			1.44	0.32	0.767873		3.84	8.16			0.393977				1.92				4.46588	6.7467							2.09962
		0.48		3.6205									1.01773			1.44	2.72	2.02224		2.08	4.48			6.72502				0.58672				0.454132	1.84103							2.77344
		0.48		2.1401									0.560594			0.64	1.12	0.736763		0.64	0.48			0.572627				0.58672				10.88	3.49989							0.973238
		0.96		3.52004									7.52999			2.08	2.88	2.24		1.6	6.88			1.14144				0.64				3.30925	1.63597							0.374257
		0.64		1.5345									1.2128			3.52	0.8	1.68568		0.64	2.56			0.314053				6.56				9.74494	0.536044							0.959987
		1.6		2.28033									1.8211			6.4	0.96	1.63454		0.8	1.28			0.291195				1.12				1.2395	1.3433							1.34413
		0.48		8.05904									1.65406			3.04	0.48	2.43939		5.44	8.48			1.18368				8.48				2.39999	6.99666							2.59834
		3.52		6.48959									1.57966			5.6	1.12	2.26326		1.76	8.16			0.952898				1.06672				1.26712	4.68822							3.90212
		1.76		0.515329									1.31296			1.92		4.12399		0.8	2.24			4.98173				1.12				8.12079	2.23674							1.74412
		0.96		0.499393									1.87711			2.88				2.4	1.76			0.640016				13.6				21.6257	5.07565							0.69387
		10.88		0.622933									1.45949			4.8				3.2	1.44			2.39999				4.64				4.35878	3.79511							0.942509
		4		1.09365									1.08957			1.44					3.84			3.99829				1.28				1.2844	2.21441							1.0713
		10.24		1.15444									3.0483			1.12					0.8			2.8681				0.96				4.13517	0.800005							1.22673
		1.28		8.20078									0.842461			7.52					1.76			1.22158				3.68				2.57155	0.777478							0.760648
		5.12		2.40353									3.99332			3.84					1.28			1.31913				0.72				4.83051	2.74356							0.578573
		4.16		2.15589									0.582308			1.28					0.16			1.93831				0.8				3.30542	0.61093							5.92001
		1.44		0.729727									1.42154			6.88					0.32			0.517735				1.54672				6.65798	0.999746							0.938791
		0.72		2.71905									1.10245			2.24					1.6			0.862105								1.41456	0.854977							0.905671
		0.96		2.50142									0.333641			1.28					2.4			1.57384								1.31045	3.04003							1.44697
		0.96		0.801011									3.30479			1.48					3.2			5.93008								12.48	2.26611							2.91362
		2.72		1.93914									2.71999			0.8					0.72			1.12002								6.1351	8.0865							1.30696
		5.28		5.16084									6.8527			4					0.32			6.71695								4.04585	5.6631							1.12736
		4.8		4.80462									4.8206			3.68					0.64			2.98574								4.03265	3.07824							1.42326
		0.48		2.37868									2.47479			4.8					0.64			0.520015								15.023	11.6553							0.652326
		1.28		6.48221									12.1453			0.48					0.32			1.29477								10.4264	6.2812							0.624502
		0.96		1.42083									2.02987			0.64					1.28			1.63846								11.005	3.5042							1.24867
		1.92		4.30664									0.846383			0.96					1.28			0.941866								1.85438	3.57093							1.30551
		4.16		1.43559									1.83632			1.92					1.28			0.903791								5.60189	9.55054							1.29142
		2.56		4.92091									3.0252			0.32					1.28			1.0128								11.2357	0.773745							1.26725
		2.24		1.10028									5.33552			1.76					1.28			0.639369								4.7661	3.40031
		1.6		0.634576									5.34548			1.6								1.53262								1.08493	3.27292
		0.8		1.43135									1.60005			1.6								0.433046								0.991798	3.60014
		2.08		0.469717									0.486625			1.44								0.962073								0.965839	2.4048
		1.12		0.534741									0.457633			0.8								0.523425								14.8538	1.14947
		0.64		0.645673									0.400845			0.64								0.290396								4.33556	3.0527
		0.64		0.61608									1.28934			0.64								1.00002								1.32686	5.56749
		2.88		0.540343									0.828363			2.24								0.903014								1.0029	7.78805
		0.8		0.345294									2.44899			6.56								0.508017								4.23442	7.6288
		0.64		0.347323									3.13865			3.52								0.819853								5.7292	3.41008
		4.32		0.817474									2.74869			3.52								1.92001								2.34669	1.20666
		5.76		0.863951									1.99507											1.12289								4.50442	1.12589
		0.96		0.641267									2.73599											0.487887								22.0799	1.37854
		2.88		0.499393									4.88812											1.13081								1.80888	1.30683
		0.96		0.499231									1.05342											0.480001								5.14418	2.08313
		0.48		0.4641									0.907929																			3.18742	2.10633
		0.8		2.57882									1.85375																			2.74356	4.12779
		0.96		2.21009									2.17383																			4.83468	2.98433
		0.96		0.768228									3.60735																			1.15104
		4		1.16747									1.81227																			1.57351
				0.587391									1.80327																			5.26965
				1.47782									0.947523																			1.2844
				5.26562									2.25696																			3.49397
				0.780306									3.05933																			4.86411
				0.916697									0.509465																			9.06808
				4.80088									2.89326																			13.6512
				0.680319									2.21353																			5.24612
				0.665378									0.468388																			3.38618
				0.494785																												0.799982
				0.665378																												3.20002
				1.45715																												6.9642
				1.00319																												8.49684
				5.21916																												0.674559
				0.820244																												1.78452
				1.25866																												2.50741
				2.70604																												7.16748
				5.1334																												12.6656
				0.480007
				0.360002
				0.794998
				0.282843
				0.300718
				8.00001
				0.494785

## Sheet: GST displacement values (µm)
wild-type				R1852C				C1822S				C1822S R1852C				H3639
2.33592	1.63637	2.55996		0.65442	1.12988	1.89753		2.51714	1.72846			0.761051	1.23072			2.4
1.5792	0.626701	0.799982		3.51009	1.12988	1.1644		0.824426	2.52809			1.31045	4.16007			2.56
1.79471	0.635946	2.71999		2.73894	0.886633	3.99499		1.06606	1.31717			5.36864	2.77708			3.52
0.876873	5.0017	1.12045		4.32621	5.46634	0.767612		1.20801	2.00581			0.88474	5.60004			1.92
0.748967	0.816058	0.907659		1.13784	2.89636	0.378752		0.639999	0.580351			1.00525	1.30911			3.36
2.39737	0.34767	1.73133		4.15347	2.97218	0.812312		0.314448	0.853355			1.68611	4.91111			2.24
0.674559	0.851042	0.747947		1.93477	2.0953	0.947996		3.17923	1.0963			1.39817	1.27649			2.72
2.1656	0.757061	1.01252		0.800024	5.39573	2.54716		3.08533	4.16007			0.800445	4.93405
0.909691	0.709119	0.680319		1.40952	1.25294	0.960002		1.76001	0.667169			15.0548	2.1008
1.71312	0.962899	2.60141		3.70954	1.48034	0.985154		0.703902	2.25598			3.20157	5.44009
1.94358	5.05088	1.12842		1.11068	1.44	0.742406		1.17459	1.56173			1.20045	6.25764
1.15901	4.62035	2.07603		2.25179	3.01184	0.768228		1.57435	2.37762			1.82285	2.88004
0.814361	0.55479	3.64508		2.72791	2.24709	1.61362		0.634239	5.22628			6.85492	0.987008
1.69799	8.51615	0.561386		2.0495	1.35025	2.05578		0.606463	1.77878			4.14734	12.142
0.780522	4.59902	0.329891		2.72	7.68007	1.44002		10.2399	0.832433			0.629677	1.30474
0.789471	0.952798	3.46945		3.72593	1.30976	1.4494		11.2617	1.60546			0.745634	0.954083
2.1027	1.6802	6.09789		2.89207	10.2052	1.1545		2.74301	0.897523			0.63999	1.05056
1.58761	4.70413	2.23406		0.661161	5.61766	1.09887		1.59495	0.620331			0.764528	2.75572
1.1154	0.590079	3.87735		4.82983	0.799971	3.5043		1.64703	0.765661			6.74936	1.44397
0.905512	1.4702	0.476353		6.41523	2.72	0.968126		1.85235	0.780867			1.92147	3.79583
2.9227	28.8061	3.5412		5.31329	1.12397	2.24001		2.98578	1.01111			1.64025	2.24
1.11996	2.78431	1.11209		6.59164	6.75477	1.22302		3.23277	1.46504			0.828542	0.674603
4.47418	19.3472	1.69065		7.03994	2.55995	1.59053		0.674559	0.386965			1.4669	0.613882
2.26326	0.550073	0.517216		1.25601	2.84747	2.92803		0.398318	0.546102			2.147	5.11541
1.67493	0.942148	4.20122		1.4202	0.799992	0.757604		6.82692	2.19644			6.26473	3.14931
0.830432	1.78446	3.24304		0.639982	15.5593	1.26012		1.6878	1.88603			1.00898	2.65632
0.960209	15.6675	0.964644		3.67991	7.0085	1.00319		0.947872	4.16002			1.76075	1.22339
2.94233	1.41892	1.3107		3.03459	6.73379	2.1591		1.28001	1.59997			1.46158	0.674559
2.01144	0.419165	0.674751		6.2494	7.49073	0.472134		1.92902	2.38468			2.01467	1.43098
3.93625	2.55794	2.03141		2.38387	4.96004	0.869942		0.622184	1.97464			1.46694	2.85619
0.947872	0.644809	2.15476		0.601809	1.00081	0.467544		3.05214	2.43361			0.787761	1.0387
0.942509	2.23808	1.16961		1.91991	9.11991	2.08002		1.0352	1.41599			4.4908	0.586616
1.15563	2.2451	0.494833		10.6061	5.74504	0.628024		2.20751	0.644094			1.01712	1.0585
0.787114	1.43713	0.737138		0.493258	7.52873	1.58688		1.5811	2.8318			1.01441	0.586616
1.05314	0.747389	1.60279		1.77812	3.34425	0.822167		1.08037	3.8638			1.26539	2.71999
1.08009	3.12868	1.18013		2.84698	6.08005	2.38443		0.503091	1.44002			7.39008	9.02167
0.762501	3.05439	4.15991		2.87453	4.49607	1.11996		2.56039	0.521562			0.65348	4.19936
1.68627	1.1223	1.11995		5.42524	6.60044	0.580393		1.69498	2.03198			7.83334	2.07999
1.25436	0.809852	1.81325		0.640007	2.20318	0.986424		0.65348	1.21709			4.94542	5.25342
1.65708	0.922578	0.984028		8.83484	2.72002	0.627164		0.750757	0.902042			0.658449	5.44007
0.936775	0.780306	5.26046		3.51998	5.75997	0.810334		1.45253	0.465985			4.03068	2.22109
0.798492	0.923111	0.74197		6.38556	3.51483	0.400005		1.22768	4.48516			1.58908	5.2553
0.470397	5.27146	3.62048		1.44	2.07997	1.27125		0.517469	14.2487			0.881564	0.63999
1.96108	8.03885	1.36059		7.50988	4.9601	1.24003		1.15608	0.460468			3.99994	5.43869
0.839463	3.10288	0.6207		8.49454	3.36883	0.921099		0.85328	0.982439			1.28116	1.79212
16.0002	13.4572	3.39841		6.57133	1.18898	0.469717		0.959987	3.29833			1.25686	1.26178
11.8826	0.466215	0.954173		7.48696	6.71264	2.24923		1.09386	0.840962			2.21362	0.606463
1.55707	0.371203	1.06168		8.95979	5.44	3.98574		0.651	1.18438			1.8211	6.02318
1.18637	2.97756	0.960042		1.29617	3.65628	2.57406		0.575646	0.480041			0.261729	1.01191
4.30342	0.457088	0.526256		1.75391	2.54498	1.25592		0.494975	0.806021			1.94268	0.824426
33.5358	0.95946	1.52056		7.67983	4.80135	2.88824		0.50742	0.635135			1.6167	0.66128
0.981438	2.23407	2.52211		3.03993	3.52758	1.14574		0.463099	0.959987			0.792733	0.384532
0.57687	1.21096	0.576895		0.645582	0.960045	1.264		0.42263	1.62445			5.57625	0.598986
4.03027	0.470497	1.14026		3.69359	0.96531	0.959968		1.05546	0.93661			3.82556	0.651263
0.642166	0.578619	3.55986		4.8101	9.12017	1.16013		2.11141	0.949376			2.93563	1.58951
0.800445	0.595469	1.31303		3.51993	16	0.7839		0.62934	1.12006			1.17359	1.29084
1.4038	1.822	0.724415		1.93412	13.4402	0.93661		1.16478	10.1148			2.65225	5.09722
1.78641	2.07095	0.492481		5.46102	1.27999	0.96488		0.832092	0.940666			3.54654	2.044
1.58965	6.23012	0.970371		1.29032	1.43996	0.614655		0.662655	0.876424			2.20099	2.34797
1.88162	0.81345	1.01603		1.13525	0.480022	0.995495		0.296234	0.992171			2.62002	0.972477
2.29522	0.557311	1.02695		0.791072	1.59999	0.641267		0.65348	0.897523			7.33804	1.79131
4.14961	1.91441	4.33069		0.661446	2.71997	0.799976		1.60853	0.920823			1.78443	1.52869
0.879974	1.7765	1.92		0.790714	1.12	0.746824		1.08145	0.953597			2.06459	1.32194
1.73951	0.310109	0.634576		0.497309	3.52	1.62288		10.1727	0.857491			3.5367	3.06445
1.27808	0.75363	1.1402		2.09302	4.64004	1.9536		1.83633	3.33183			1.5688	1.04541
1.42987	1.21438	1.46504		0.946185	6.40012	1.82505		1.10814	3.95519			4.4648	0.925129
0.947057	0.705663	5.64		7.70066	3.51999	1.10162		0.440388	0.319952			0.767873	0.80641
0.644991	7.25158	3.24522		1.43035	12.1599	0.36836		0.896574	1.31107			0.667775	1.95917
0.792186	1.60567	3.18246		2.71055	4.16006	0.796087		1.31854	1.8935			1.30306	3.48123
1.77276	0.425665	0.500405		2.72431	1.11997	0.797523		1.2682	1.05252			1.075	3.03785
1.19866	2.22556	0.920581		0.35625	0.480015	2.56007		0.582436	1.1005			2.70501	0.362265
2.29279	0.971954	0.801011		3.21757	3.6301	0.44771		0.512257	0.780867			0.960007	4.19414
2.13657	1.4387	2.84326		1.90474	1.77016	0.808346		0.360228	0.298473			0.452545	2.4057
2.34716	5.61785	1.12002		7.18062	1.72979	0.477752		8.30708	7.38381			0.82638	8.45202
9.73543	1.0213	0.340543		1.92002	4.80436	0.38048		0.668316	1.69129			0.946009	1.28165
3.54431	1.49674	2.55996		4.15997	0.976732	0.333657		0.810971	1.27997			1.6764	1.59014
0.710277	0.567551	0.48006		1.27994	1.6191	2.38988		0.859549	2.2524			2.11646	3.53601
1.65358	3.52003	0.656639		2.07999	1.27977	0.764241		1.91993	2.2207			4.63999	7.68302
0.968264	1.38915	0.67218		3.71134	1.58162	0.526369		1.26445	1.57065			2.67906	1.17553
1.34783	2.56007	0.322441		1.13534	4.49744	0.788978		0.707786	2.19434			1.81655	1.76019
32.1237	1.00432	1.39249		1.90701	2.09074	1.10661		1.43856	0.748734			2.19724	4.98563
4.59896	2.01373	0.832433		1.10781	4.46631	1.57842		0.674559	0.521562			0.639981	1.13828
1.46047	0.388739	3.17066		1.2128	5.73994	0.633564		0.814273	0.681198			6.72009	2.79013
20.4701	1.76094	0.986346		1.38144	5.141	0.960873		3.2507	0.953597			1.31353	2.21362
5.9735	0.456508	1.34527		4.6164	1.91987	0.48163		7.81385	1.76001			2.37723	1.8992
1.24608	0.516138	1.58478		0.960015	8.755	2.06263		2.91889	1.11812			0.77337	0.294516
1.72792	0.707957	1.44001		0.615583	2.59822	2.55995		1.07191	0.806104			1.94007	1.09746
2.22675	2.25216	0.847665		1.58482	4.49857	0.796359		1.54769	0.749823			5.31374	0.562845
3.87878	0.801731	0.614655		5.26429	3.02145	0.585762		0.798492	1.45961			7.02046	1.00458
5.62399	0.624811	15.1814		1.77768	5.44009	1.75214		0.492707	2.23708			1.16067	7.1999
2.13994	0.545825	0.591089		0.480001	2.50499	0.648446		3.05888	2.07897			4.80158	0.320039
1.32656	0.401976	2.73995		6.46471	4.7844	0.978913		5.12334	1.11666			0.835439	0.799982
5.38322	0.634576	2.86557		5.11994	5.11992	1.25036		0.786833	0.631167			1.72054	0.533444
5.32312	0.852733	3.47162		3.2098	1.62192	0.932441		0.337346	3.05088			1.54115	6.71509
19.7088	0.64615	5.57817		5.92011	5.75993	1.64026		0.636492	1.55156			4.04368	4.32505
1.68505	1.11195	0.547297		1.43113	1.47432	0.836037		1.4605	2.33548			6.89989	0.960421
1.73497	0.80675	1.53833		0.580351	7.2124	1.12618		2.24492	0.793931			3.34103	0.814475
2.23526	1.33874	0.857728		3.66827	13.2968	0.799982		1.22035	1.38989			2.02126	2.70939
0.728767	0.615509	0.820244		3.34552	14.5599	1.40487		0.731196	0.533328			1.00319	0.461688
0.282843	0.468079	0.644995		0.437839	16.0003	1.729		1.46326	1.38092			5.66114	2.28039
0.941649	0.992171	1.10132		1.62577	1.1025	0.946095		0.914857	1.37395			1.82896	0.747157
0.558335	0.565708	1.46507		0.768802	7.54289	3.67436		1.1251	0.480041			0.494837	2.12929
0.824053	7.29893	1.00802		3.52001	3.52004	1.11996		0.829329	1.39949			1.952	1.726
1.27998	0.840043	2.08039		1.91399	1.58304	1.42411		1.31835	2.19547			2.24376	0.555388
0.34767	0.806104	0.384666		5.42892	2.72505	0.675226		1.09406	0.839518			1.76862	3.99507
2.72845	0.879974	1.44005		1.10535	9.74799	0.624023		8.74773	2.01649			1.1261	0.857698
1.94846	14.4405	1.01603		2.22304	3.9999	1.45056		0.790714	5.12004			9.77838	2.51741
0.954396	0.740256	0.62792		2.12	2.54817	1.00512		4.61844	0.786834			3.28643	0.973431
0.933292	0.590821	2.39379		0.959538	2.24004	1.13476		2.07999	0.400845			4.74539	0.898629
0.933292	0.665855	1.91997		4.54685	1.76759	3.77978		2.72968	0.827145			0.527164	1.29358
1.3816	4.65639	0.497761		7.40247	1.46718	1.29023		2.38152	2.65059			3.96761	0.768312
6.23996	0.419165	2.50337		6.76675	5.784	1.81742		5.7599	2.1008			1.15608	1.26712
4.27625	1.17491	0.589105		3.2018	4.31169	2.09603		0.491694	1.0755			0.620331	0.613003
2.3892	1.77878	1.60005		1.7661	4.00011	1.30017		1.52928	1.03062			0.788969	1.88121
10.7894	3.0879	1.47719		0.342981	5.10282	1.54508		0.674559	1.38989			1.46128	1.02361
2.90037	12.1062	0.795609		1.4545	9.59984	2.20602		0.50742	0.777504			3.82092	1.44005
1.38788	5.71413	1.11995		0.436767	3.35998	1.89645		0.408673	2.68647			1.29472	1.00858
0.99074	4.17893	0.534376		1.3682	1.12001	1.69529		1.3696	2.49577			1.28937	2.74828
0.753034	1.30334	1.01473		3.19727	4.00002	1.60956		0.983809	2.23624			0.589018	4.50319
1.11885	1.1402	1.21614		3.0609	14.7201	3.66173		1.20461	1.69117			0.658539	3.1626
3.80695	1.29599	3.23926		0.633234	0.959998	1.86512		0.987811	1.23341			0.815039	1.84328
3.11941	1.94548	2.17279		1.94397	3.67991	2.16367		1.33672	1.55156			2.75434	6.40731
2.04673	1.77426	5.91993		1.2806	3.19997	0.456958		0.614655	0.70438			1.54178	3.55606
0.815784	3.3286	1.25935		1.60875	2.24	1.61973		1.46504	0.477377			3.28278	8.67214
3.19446	0.545825	1.7864		1.46214		3.33388		0.737138	0.482982			2.44264	4.06538
0.86929	1.67986	0.282408		0.760546		0.936142		3.20003	0.913331			10.8565	2.72396
1.4105	13.12	1.37934		1.44001		1.11236		0.959968	0.659711			1.21597	2.05535
13.1593	1.42438	1.16282		2.06803		0.994611		0.817474	3.12731			2.40647	3.67998
1.2134	4.01961	0.93243		4.48571		0.867905		5.74067	0.761073			4.2712	1.70245
3.96817	2.04749	0.452636		1.11439		0.979298		7.17844	2.73284			1.72068	1.22074
1.22035	0.471007	1.39853		1.77036		0.665378		1.28003	1.27651			1.94007	0.960042
0.509281	0.569513	1.42853		1.92003		0.529437		2.04305	1.02326			1.94185	1.05689
0.57687	0.408673	1.02934		2.08833		0.898524		0.719022	1.66481			0.48006	0.482982
0.544384	2.8681	0.280014				1.22691		0.48006	1.77327			5.08424	2.65237
1.10633	0.493905					1.93398		0.368827	3.54145			5.2994	5.86214
2.05358	12.6772					0.822302		6.60313	0.479985			3.64844	1.14947
4.08299	1.33189					1.42083		0.660268	2.55719			1.95302	0.88544
2.28009	0.814685					0.644995		1.60196	0.546102			0.843961	4.03018
0.854977	2.00652					0.920031		1.85626	1.60001			2.66678	0.814273
0.733001	2.79953					1.18757		0.702581	0.625813			0.354193	3.31188
0.368827	0.820018					0.569727		1.92738	1.53596			3.02056	1.44103
0.935694	3.46804					2.87782		0.641261	1.06168			3.83633	6.79841
0.409103	2.1769					1.39861		1.63637	0.979998			0.665994	2.50379
1.31176	1.63028					0.730041		3.04479	0.737138			1.39561	1.6
0.763903	13.1347					1.25903		0.906196	0.847201			0.672375	5.14751
2.69592	0.78474					1.54138		2.76451	1.44914			2.23165	1.11999
0.672375	2.506					0.490874		5.89919	1.82141			2.96001	1.91304
0.928866	2.20305					0.63999		3.8307	2.56002			2.29689	4.81879
0.449308	3.88794					2.08892		0.799992	1.93932			3.20378	5.94656
2.79114	2.47236					0.931779		1.16483	1.9008			5.11166	3.35426
1.52525	0.643475					2.89055		1.17945	1.07194			1.75994
1.34746	2.7258					1.28563		3.82092	2.40532			2.70195
2.60303	1.73571					0.924096		0.675071	0.770781			7.36008
0.543871	10.8597					1.27999		0.868449	1.67778			7.51382
0.813226	8.62325					0.506403		0.692223	5.61883			2.37571
11.871	1.79844					1.42464		0.941868	0.93243			7.59998
0.792186	0.859549					0.791025		0.645424	0.460993			3.36935
4.21384	1.03728					1.12		6.21428	1.35808			6.56425
0.623798	0.955948							2.25256	1.50714			0.832964
0.780522	1.27496							4.50832	1.42181			6.86264
0.843211	0.639999							1.00618	0.806104			1.58604
0.768248	6.66378							1.82785	1.44003			0.97993
2.59492	1.0029							1.15025	0.668422			0.823228
2.35728	0.831423							1.22913	1.29945			2.24168
2.27227	0.388739							1.34522	1.36059
1.55265	2.22929							4.16002	0.908467
0.415213	0.470547							1.90174	4.26978
1.44862	3.61807							7.77998	0.920823
1.07075	0.505921							1.4257	0.319952
5.29906	1.82422							0.408673	0.820244
1.60006	0.866743							2.07995	0.770781
0.293364	2.37159							1.48017
5.10549	4.22205							2.17991
2.03367	0.695341							1.2899
1.88609	15.6216							8.82358
0.937759	12.1631							0.946566
1.71984	2.68853							1.95805
1.04665	6.24081							0.190191
2.00595	0.683056							1.22277
1.80001	0.726741							1.00081
0.667169	4.75864							0.712275
0.597759	2.35796							1.58591
26.3197	5.8888							0.479985
1.60005	7.46142
1.9467	4.52668
10.2556	7.03999
1.10673	5.26625
0.314448	2.0253
5.43479	1.9036
4.95847	0.627742
0.748515	0.644417
0.454132	18.5347
0.908265	0.461688
0.777478	2.39035
1.31659	0.424603
0.282852	7.83256
10.7026	2.47047
6.69075	3.18854
4.13148	1.59998
1.66783	1.43061
0.624767	0.570777
1.24891	0.809117
1.90174	0.6382
1.27733	0.48001
	0.640002
	1.60884
	1.11694
	0.48006
	2.71128
	1.26696
	0.799979
	0.328492
	0.34767

## Sheet: GST velocity values (nm per s)
wild-type				R1852C				C1822S				C1822S R1852C				H3639
171.428	133.332	150.587		320.006	29.4739	50.527		99.9993	160			160	106.666			6.28272
160	21.3327	199.999		44.0004	29.4739	43.0774		133.332	55.6512			91.4283	86.6679			14.2222
146.669	18.8242	170.002		59.1299	68.5707	44.4452		139.999	120			87.7433	85.0009			21.4634
95.9985	85.5168	15.7755		28.8002	30.2215	57.1435		93.3343	160			95.9985	77.7776			24.6154
133.332	80	96.0009		56	39.9999	31.9993		106.666	106.666			111.999	80			20.4064
120	80	110.002		29.7136	60.8004	33.3336		53.3332	160			125.715	118.097			7.72414
106.666	133.332	133.335		18.8242	38.5186	48.0005		72.7281	80			39.9999	21.3327			8.99477
139.999	133.332	137.141		12.5005	36.757	47.408		189.997	86.6679			80	99.2018
95.9985	106.666	213.333		239.999	58.181	60.0002		146.669	80			82.6372	173.334
97.7792	8.57213	63.9987		36.7993	89.9985	60.0002		66.6677	200.004			19.9996	38.3107
137.145	85.3345	62.2238		19.9996	37.8944	80		80	99.9993			280.007	66.3819
111.999	178.458	53.3335		18.6666	33.0439	66.6677		99.9993	66.6677			125.715	110.768
80	239.999	141.536		33.1714	24.8881	57.1435		106.666	114.784			36.9889	80
125.715	50.4762	160		35.8628	64.0004	45.2176		106.666	176			20.1941	57.3589
133.332	165.717	106.666		52.3087	33.9827	65.4536		104.488	57.1435			160	53.3332
80	120	88.0008		33.4549	35.5547	39.9999		99.9993	99.9993			99.9993	53.3332
148.57	80	85.6331		18.9481	46.9733	62.2223		9.64565	95.9985			64.0004	111.999
114.286	110.475	106.666		22.8565	42.424	34.9994		114.286	80			44.4452	113.332
111.999	106.666	109.714		35.8209	16.6662	25.5066		88.8896	200.004			88.4198	80
95.9985	24.8269	120		38.5547	27.1999	39.9999		120	99.9993			13.5209	96.841
160	120	70.3984		42.5815	18.064	53.3332		116.925	111.999			47.0597	86.1536
139.999	226.667	79.9998		39.048	46.6658	128.002		123.076	102.857			133.332	53.3332
117.893	101.896	125.713		35.9182	38.7873	61.5394		106.666	160			26.6667	80
139.999	80	96.0009		26.6667	41.1427	51.4281		53.3332	160			80	24.3806
110.002	120	59.4272		17.1432	80	33.3336		80	223.998			74.286	72.7281
200.004	176	79.9998		45.7145	32.8806	80		99.9993	191.999			68.5707	151.113
95.9985	191.218	106.666		20.9085	26.2686	80		120	129.998			80	91.4283
116.925	15.6519	85.3316		21.7145	14.4202	86.1536		128.002	99.9993			37.8944	106.666
137.145	160	91.429		29.1587	34.8149	29.9999		6.80919	63.1575			65.0003	7.12855
112.942	18.5504	115.556		35.2942	43.5088	66.6677		239.999	64.0004			80	84.7071
120	12.7996	111.999		64.0004	80	17.1432		126.665	60.0002			44.4452	186.663
95.9985	10.1815	70.0002		9.89647	36.7739	8.38716		111.999	143.998			72.2577	80
111.999	13.6588	239.999		38.2609	15.4838	80		148.57	26.6668			95.9985	120
99.9993	9.60032	99.9993		34.2864	27.6478	13.5597		99.9993	180.004			95.9985	80
139.999	200.004	88.8896		15.7142	39.0705	80		70.0002	51.8911			71.1123	85.0009
139.999	138.179	80		42.3525	20.6805	18.7506		120	48.0005			108.236	121.083
99.9993	33.7785	49.5229		21.818	41.4822	39.9999		8.82784	80			80	99.046
48.8897	111.999	111.999		38.3107	33.4696	80		146.669	148.57			91.1615	61.1757
128.002	99.9993	137.145		17.7781	53.3332	28.2352		80	186.663			70.8577	73.3322
133.332	120	111.999		46.8082	37.7783	29.0907		99.9993	80			31.9993	143.161
80	80	97.7792		32.592	48.813	22.2221		55.3843	60.0002			23.2558	186.663
200.004	120	133.332		37.6468	20.9518	53.3332		186.663	50.9087			42.1061	53.8774
160	91.0332	76.6663		29.9999	41.5992	42.6658		120	57.8869			80	64.0004
87.2741	108.11	80		30.3221	17.1038	39.9999		139.999	80			83.3329	85.0009
99.9993	60.8004	64.0004		37.5224	27.9999	68.5707		80	160			80	97.7792
79.2081	100.297	125.715		32.4749	62.2223	48.0005		120	88.4198			91.4283	58.181
130.436	120	39.9999		42.247	25.4544	22.8565		70.0002	99.9993			86.1536	106.666
133.332	80	80		30.4755	43.1747	24.0971		160	106.666			97.7792	43.4292
160	151.997	68.5707		25.6005	26.2856	23.7032		120	80			53.3332	120
102.857	160	120		23.1574	42.6658	49.2317		80	57.1435			33.1027	133.332
94.3828	239.999	80		22.8565	11.4826	12.8569		80	106.666			88.8896	64.0004
160	160	106.666		22.686	8.79958	43.0774		160	120			133.332	160
160	111.999	106.666		21.3327	34.2864	39.9999		48.0005	99.9993			71.795	53.3332
111.111	60.0002	128.002		18.4003	20.8698	80		80	95.9985			87.2741	106.666
80	45.7145	92.6319		12.3075	46.0615	70.0002		173.334	31.9993			102.857	160
80	239.999	320.006		13.968	40.6091	66.6677		53.3332	93.3343			111.999	160
89.9985	220.001	160		12.4676	46.0281	95.9985		43.0774	35.7439			97.1444	69.1883
125.715	49.5229	60.0002		22.8565	35.5547	95.9985		99.9993	95.9985			92.6319	69.3324
160	91.7639	120		25.6005	55.3843	106.666		106.666	133.332			74.6665	92.3089
29.9999	133.332	120		62.2223	34.2864	48.0005		39.9999	160			58.181	43.6355
86.1536	106.666	95.9985		25	61.5394	39.9999		80	95.9985			102.222	176
122.351	11.5667	48.0005		39.9999	22.6664	57.1435		16.3271	80			30.3444	102.857
160	14.6669	106.666		44.4452	25.4544	49.9993		32.941	120			25.3652	102.857
146.669	80	53.3332		21.818	26.6667	49.9993		81.2694	133.332			60.6903	126.665
106.666	99.9993	80		45.2176	16.5716	60.0002		73.3322	98.8235			57.1435	160
71.9995	213.334	102.857		48.0005	42.1061	146.669		22.3996	106.666			46.6658	43.6355
95.9985	106.666	80		39.1829	42.9262	80		120	80			99.9993	44.4452
106.666	245.34	145.453		37.8944	42.5171	39.9999		160	31.9993			106.666	106.666
80	49.9993	133.332		12.7108	19.8099	26.6667		128.002	95.9985			45.7145	80
110.002	60.0002	80		7.47208	6.43665	66.6677		128.002	93.3343			70.0002	29.2315
93.3343	14.3597	120		53.3332	17.1432	18.0288		120	93.3343			50.3709	80
101.819	15.0005	80		22.2221	36.7993	120		60.0002	99.9993			36.9228	25.9998
139.999	65.4536	68.5707		25.2638	46.3166	39.9999		80	53.3332			60.0002	41.3795
74.999	233.329	62.2223		34.6158	62.8566	29.9999		31.755	26.4745			44.4452	136.772
90.3695	95.9985	80		45.7145	16.6662	80		160	114.286			120	8.76708
117.333	102.857	75.2933		21.01	28.2352	22.8565		200.004	320.006			87.999	22.2221
133.332	106.666	120		58.181	19.9996	30.77		133.332	101.819			129.997	73.3322
125.715	251.43	106.666		61.1757	37.6468	80		95.9985	101.819			64.4436	98.461
239.999	180.004	160		36.7993	31.9993	60.0002		91.4283	133.332			43.8713	139.999
102.857	160	80		10.98	29.8662	9.99998		80	124.445			73.3322	80
101.131	80	143.998		45.7145	39.9999	70.0002		180.004	57.1435			93.3343	107.826
55.2378	64.0004	57.1435		29.4739	22.1784	42.1061		106.666	80			160	93.3343
143.998	80	133.332		106.666	43.6355	35.5547		133.332	80			71.4906	85.0009
56.2646	15.1726	29.9999		89.9985	42.6658	80		72.7281	120			106.666	86.1536
82.2227	80	128.002		48.3334	38.4	39.9999		78.3992	146.669			92.3089	48.0005
106.666	120	160		48.0005	32.8365	28.8886		130.907	186.663			99.9993	39.9999
46.3166	160	80		53.3332	33.6848	80		111.999	99.9993			80	93.3343
86.1536	9.10636	200.004		25	32.4635	99.9993		72.7281	106.666			110.002	160
106.666	99.9993	106.666		51.7642	23.3845	53.3332		200.004	102.857			100.57	95.9985
164.702	160	54.6767		30.3444	26.1542	39.9999		120	93.3343			80	65.4536
94.5467	120	320.006		60.0002	51.1995	26.6667		33.0439	7.48194			85.7145	53.3332
64.0004	80	90.6656		40.5056	33.3336	43.6355		20.9831	93.3343			49.9993	99.9993
38.3107	53.3332	34.2864		43.3895	42.6658	35.5547		133.332	106.666			73.3322	120
138.945	66.6677	60.6903		21.0533	39.9999	31.9993		53.3332	116.925			80	44.8003
55.5932	17.7781	49.1221		37.0008	38.9184	72.7281		64.0004	114.286			57.1435	20.5718
99.9993	34.9994	60.0002		48.0005	45.0005	66.6677		180.004	99.9993			68.8011	80
110.002	7.14262	88.8896		106.666	16.5133	16.0001		8.00057	57.1435			76.3642	99.9993
19.6484	120	57.1435		28.3075	30.4595	99.9993		106.666	102.857			69.3324	39.9999
99.9993	160	80		23.6622	31.379	48.0005		200.004	80			80	120
80	120	80		39.9999	34.7833	38.2609		143.998	102.857			84.8494	80
95.9985	160	56		31.9993	43.0774	53.3332		120	106.666			55.001	80
106.666	160	45.0005		44.4452	25.2346	10.3959		17.4999	80			120	69.3324
66.6677	216.465	95.9985		30.8775	40.931	50.9087		36.3637	143.998			160	97.7792
91.4283	80	7.07507		21.3327	42.1061	65.4536		213.334	139.999			93.3343	320.006
80	99.9993	80		33.9992	20.606	29.0907		93.3343	133.332			110.002	125.001
97.1444	160	120		34.9994	33.6552	39.9999		95.6518	148.57			56	95.9985
120	130.907	120		23.333	28.9849	60.0002		44.4452	196.928			87.1427	39.9999
120	80	53.3332		26.6667	33.6848	60.0002		154.666	133.332			40.9751	80
99.9993	53.3332	9.4488		36.9228	43.0774	37.3335		61.1757	80			38.7097	95.9985
99.9993	106.666	120		52.0937	67.6914	51.8911		68.0011	80			239.999	128.002
120	154.666	60.0002		47.7918	31.305	22.0687		150.003	60.9525			57.1435	133.332
58.8669	160	91.4283		49.4109	26.6667	48.8897		95.9985	173.334			139.999	128.002
29.1888	280.007	80		35.5547	27.3418	39.9999		80	95.9985			80	64.0004
92.3089	176	5.40476		15.7142	21.9786	80		114.286	186.663			49.9993	95.9985
63.0579	168.89	120		31.9993	41.9671	53.3332		106.666	102.857			80	111.999
143.998	187.503	99.9993		60.0002	44.859	32.941		80	133.332			106.666	143.998
143.998	120	111.999		160	38.182	95.9985		60.0002	104.617			106.666	120
120	122.351	120		60.0002	32.941	62.8566		106.666	182.86			128.002	52.3087
200.004	128.002	80		47.0597	43.478	44.4452		95.9985	186.663			45.7145	139.999
186.663	80	160		19.7402	31.3194	73.5999		106.666	99.9993			53.3332	123.076
91.4283	160	133.332		45.7145	29.9999	53.3332		120	213.334			66.6677	73.8451
123.076	148.57	103.998		38.4	27.0583	47.2723		128.002	114.286			104.617	114.286
103.998	125.715	36.5424		80	49.9993	48.0005		106.666	160			88.8896	56.7732
95.9985	152.727	160		42.1061	80	66.6677		102.857	239.999			94.1161	65.4536
32.6523	120	67.6914		24.8269		56		99.9993	80			92.3089	99.9993
133.332	133.332	53.3332		66.6677		48.0005		123.076	133.332			37.5173	15.4548
89.9985	187.43	143.998		32.7272		24.3486		80	106.666			128.002	115.556
76.2789	29.9999	93.3343		26.6667		68.5707		99.9993	61.5394			74.999	102.222
80	76.9239	120		36.1298		53.3332		102.857	80			122.351	87.999
39.9999	239.999	120		11.4284		60.0002		83.7211	9.7845			87.999	91.4283
106.666	120	48.0005		41.9048		64.0004		80	5.92537			80	68.5707
60.0002	239.999	10.2851		27.4291		29.9999		69.3324	95.9985			87.2741	139.999
160	60.0002	111.999		37.1432		53.3332		99.9993	114.286			120	80
160	39.9999	80				49.2317		120	110.001			65.6403	42.4992
93.3343	120					10.4342		80	13.968			62.8566	73.8451
86.6679	30.0955					21.0533		86.3166	39.9999			131.427	80
111.111	58.181					102.857		80	182.86			106.666	99.9993
93.3343	133.332					80		160	160			99.9993	90.9084
80	173.334					80		160	133.332			68.0011	133.332
160	143.998					71.1123		80	160			160	73.0424
80	80					106.666		191.999	114.286			63.3322	80
133.332	83.8089					33.4877		80	80			17.7781	52.9227
120	74.286					51.4281		133.332	95.9985			53.3332	85.3345
128.002	34.7833					57.1435		72.382	99.9993			55.3843	72.7281
106.666	28.6457					213.334		133.332	133.332			64.0004	82.5795
90.6656	99.9993					42.1061		104.617	8.67524			41.4822	70.0002
64.0004	116.362					48.0005		82.2227	110.001			80	21.3327
95.9985	280.007					64.0004		14.014	128.002			124.446	104.349
120	213.334					6.11774		80	106.666			94.1161	89.6954
135.998	171.428					48.0005		139.999	191.999			98.461	8.6597
99.9993	45.7145					14.8459		111.999	186.663			62.8566
143.998	90.6656					13.9133		106.666	99.9993			123.638
116.362	87.999					26.6667		106.666	133.332			115.002
106.666	41.8461					11.4284		99.9993	110.001			52.223
99.9993	110.768					29.9999		106.666	56			99.9993
93.9698	97.7792					25.7145		133.332	120			80
80	133.332					44.4452		5.16075	60.0002			44.2098
143.998	111.999					10.3703		107.587	106.666			84.1023
64.0004	34.2864							186.663	180.004			66.6677
133.332	25.6005							124.446	120			70.2051
99.9993	106.666							120	99.9993			23.5301
99.9993	176.843							120	102.857			68.5707
142.221	160							139.999	99.9993			49.9993
109.09	133.332							128.002	106.666			16.2326
186.663	80							143.998	80
72.7281	223.998							129.997	120
80	239.999							120	148.57
102.857	146.669							80	80
120	60.0002							60.0002	80
176	73.3322							60.0002	80
114.286	80							115.556	133.332
80	60.0002							71.9995
45.7145	122.351							139.999
103.998	80							320.006
137.145	99.2407							95.6518
68.5707	98.0652							95.9985
200.004	135.998							120
120	155.998							39.9999
129.997	160							213.334
80	133.332							80
80	266.671							99.9993
106.666	171.428							9.52385
51.7642	155.79							39.9999
88.8896	113.938
73.8451	223.998
25.2224	100.57
46.6658	82.4988
53.3332	191.999
49.4553	20.8698
85.5168	53.3332
80	160
80	109.178
80	120
80	14.4577
91.4283	160
53.3332	25.1288
167.498	300.009
74.6665	28.0705
40.7849	80
114.286	8.67524
106.666	80
91.4283	15.3853
120	15.2377
91.4283	26.6667
	16.8426
	11.7649
	13.9996
	120
	6.50692
	11.8519
	12.9027
	5.92537
	80

## Sheet: fraction active motors
		n = 1				n = 2				n = 3
		fraction	# active motors	n (total motors)	SEP	fraction	# active motors	n (total motors)	SEP	fraction	# active motors	n (total motors)	SEP	total N	weighted mean	weighted SEP	Z score	p value from Z score
(full-length)	WT	0.71	155	218	0.0307108	0.82	188	229	0.025373	0.76	240	316	0.0240333	763	0.763721	0.0263453	-	-
	E109I	0.81	264	326	0.02173	0.76	188	247	0.0271544					573	0.788426	0.0240706	1.06933	0.284934
	R241Q	0.63	152	241	0.0310828	0.71	103	145	0.0376737					386	0.66004	0.0335577	-3.73551	0.0001873
	N283R	0.76	183	241	0.0275229	0.78	248	318	0.0232317					559	0.771381	0.025081	0.325427	0.744878
	K540C	0.8	231	289	0.0235396	0.74	199	269	0.026748	0.68	200	294	0.0272	852	0.739622	0.0258165	-1.11819	0.263482
	E545V	0.78	202	259	0.0257413	0.8	221	276	0.0240663					535	0.790323	0.0248767	1.1294	0.258729
	I554M	0.78	235	301	0.0238656	0.8	129	161	0.0315					462	0.786972	0.0265271	0.94127	0.346551
	W612C	0.65	208	320	0.0266634	0.68	135	199	0.0331068					519	0.661486	0.0291304	-4.01155	6.03e-05
	K1475Q	0.77	257	333	0.023035	0.86	238	277	0.0208581					610	0.810797	0.0220482	2.10921	0.0349273
	R1852C	0.211009	23	109	0.0390817	0.242718	50	206	0.0298708					315	0.231746	0.033058	-16.2742	< 0.0001
	D2439K	0.82	220	268	0.0234552	0.75	138	184	0.0319221					452	0.791523	0.0268997	1.12037	0.262543
	R2543K	0.42	155	369	0.025692	0.51	61	120	0.0457092					489	0.442029	0.0305916	-11.5553	< 0.0001
	L2557M	0.75	102	136	0.0371305	0.81	120	148	0.0322308					284	0.781283	0.0345759	0.599117	0.549106
	R3152N	0.457627	54	118	0.0458631	0.514019	54	105	0.0487632	0.52	106	204	0.0349922	427	0.501288	0.0413859	-9.23206	< 0.0001
	K3160Q	0.61	98	161	0.0384812	0.62	108	174	0.0367766	0.6	107	178	0.0366851	513	0.609919	0.0372784	-5.89011	3.87915e-09
	R3201N	0.66	83	126	0.042242	0.595238	50	84	0.0535557	0.4	192	480	0.0223607	690	0.47118	0.0297845	-11.5017	< 0.0001
	H3639P	0.07	8	114	0.0238668	0.03	6	200	0.0120623					314	0.0445455	0.0163549	-21.5874	< 0.0001
	1852 mutants													total N	weighted mean	weighted SEP	Z score versus GST WT	p value from Z score
(GST)	WT	0.787645	204	259	0.0254125	0.70892	213	300	0.0262068	0.8	107.2	134	0.0345547	693	0.755923	0.0275232	-	-
	1822	0.7725	183	237	0.0272373	0.8	171	214	0.0273594					451	0.785544	0.0272952	1.15905	0.246415
	1852	0.741176	133	179	0.0326962	0.761421	124	163	0.0333987	0.814634	128.712	158	0.0309149	500	0.770965	0.0323623	0.60236	0.546908
	1822S/1852C	0.79661	164	206	0.0280536	0.761	150	197	0.0303765					403	0.779192	0.0291898	0.87548	0.381302
	H3639P	0.014	7	500	0.00525433									500	0.014	0.00525433	-0.853827	0.393216
	loop glycine mutant																Z score versus FL H3639
(full-length)	F3638G H3639P W3640G	0.0584416	9	154	0.0189027	0.025	2	80	0.0174553					234	0.0470085	0.0184079	0.136746	0.891268

## Sheet: all p-values
		velocity	displacement	fraction active motors
(full-length)	E109I	0.344	0.1785	0.284934
	R241Q	0.0006	<0.0001	0.0001873
	N283R	0.0019	0.0091	0.744878
	K540C	0.0259	0.0053	0.263482
	E545V	0.4356	0.9594	0.258729
	I554M	0.3989	0.0002	0.346551
	W612C	<0.0001	0.7646	6.03e-05
	K1475Q	<0.0001	<0.0001	0.0349273
	R1852C	<0.0001	0.452	< 0.0001
	D2439K	0.1258	0.0863	0.262543
	R2543K	0.0474	<0.0001	< 0.0001
	L2557M	0.6066	0.0409	0.549106
	R3152N	0.0001	0.3032	< 0.0001
	K3160Q	<0.0001	0.4178	3.87915e-09
	R3201N	<0.0001	0.5258	< 0.0001
	H3639P	0.0191	0.025	< 0.0001
	(all against WT; unpaired 2-tailed t test with Welch's correction for velocity data; Mann-Whitney test for displacement per event; Z scores calculated for fraction of active motors)
		velocity	displacement	velocity	displacement
	1852 mutants
(GST)	1822	0.8113	0.0542	<0.0001	<0.0001
	1852	<0.0001	<0.0001	-	-
	1822S/1852C	<0.0001	<0.0001	<0.0001	0.7749
		against WT		against R1852C
	(unpaired 2-tailed t test with Welch's correction for velocity data; Mann-Whitney test for displacement per event; Z scores calculated for fraction of active motors)
