# Supplementary material for: Molecular basis for dyneinopathies reveals insight into dynein regulation and dysfunction
Source: eLife. 2019 Jul 31;8:e47246. doi: 10.7554/eLife.47246 (PMC6733598; doi:10.7554/eLife.47246)
Supplement: Figure 5—source data 1. [file elife-47246-fig5-data1.xlsx]

## Sheet: localization frequency
								plus end				cortical
genotype	# of cells w/ plus end foci (n1)	# of cells w/ cortical foci (n1)	# of cells (n1)	# of cells w/ plus end foci (n2)	# of cells w/ cortical foci (n2)	# of cells (n2)	TOTAL N	% cells with plus end foci	SD	Z score	p value from Z score	% cells with cortical foci	SD	Z score	p value from Z score
WT	35	8	48	32	9	50	98	0.683673	0.0673272	-	-	0.173469	0.0515919	-	-
E109I	20	6	38	35	9	52	90	0.611111	0.0717843	-0.691472	0.489269	0.166667	0.0552874	0.22392	0.82282
L213I	34	5	50	47	16	61	111	0.72973	0.0593047	1.09503	0.273505	0.189189	0.0500623	0.65707	0.511136
R241L	35	6	50	40	10	50	100	0.75	0.060688	1.38878	0.164899	0.16	0.0512625	0.103304	0.917722
N283R	27	10	47	33	8	50	97	0.618557	0.0694765	-0.598	0.54984	0.185567	0.0556502	0.573261	0.566468
K540C	31	8	51	23	4	42	93	0.580645	0.0721754	-1.12419	0.260932	0.129032	0.0483819	-0.505342	0.613318
E545V	27	10	41	29	17	43	84	0.666667	0.0727277	0.0975543	0.92225	0.321429	0.0709026	2.65095	0.0080266
I554M	25	6	46	22	3	41	87	0.54023	0.0755322	-1.65513	0.0978985	0.103448	0.0454212	-1.02939	0.303295
W612C	29	1	52	16	4	50	102	0.441176	0.0674505	-3.09715	0.0019538	0.0490196	0.0285164	-2.47694	0.0132514
K1475Q	34	21	52	23	11	30	82	0.695122	0.0700883	0.503192	0.61483	0.390244	0.0753378	3.56917	0.0003581
R1852C	8	0	42	16	1	55	97	0.247423	0.0609602	-5.76855	7.97527e-09	0.0103093	0.0102151	-3.65392	0.0002583
R2543K	32	4	50	33	2	55	105	0.619048	0.0669266	-0.602264	0.546998	0.0571429	0.0314914	-2.26827	0.0233125
R3152N	24	9	31	35	6	60	91	0.648352	0.0675469	-0.164848	0.869063	0.164835	0.0533084	0.190777	0.8487
K3160Q	18	3	28	34	13	54	82	0.634146	0.137931	0.0975543	0.922286	0.195122	0.0582725	0.713145	0.4757
H3639P	8	0	37	9	6	31	68	0.25	0.07399	-5.18281	< 0.0001	0.0882353	0.0323486	-1.25975	0.207741
1852 mutants
C1822S	43	13	55	37	13	50	105	0.761905	0.0587104	-	-	0.247619	0.0595464	-	-
C1822S/R1852C	29	5	50	35	4	50	100	0.64	0.0673036	-1.9082*	0.0563654	0.09	0.0403965	-2.9979*	0.0027182
R1852V	16	2	44	15	0	51	95	0.326316	0.0678406	-	-	0.0210526	0.0145442	-	-
C1822S/R1852V	14	0	46	17	1	48	94	0.329787	0.0684494	0.0508**	0.959485	0.0106383	0.0105269	-0.5728**	0.566809
										*C1822S/R1852C compared to C1822S
										**C1822S/R1852V compared to C1822V
		#DIV/0!

## Sheet: intensity data
WT				E109I				L213I				241L				N283R				K540C				E545V				I554M				W612C				K1475Q				R1852C				R2543K				R3152N
cortical		plus end		cortical		plus end		cortical		plus end		cortical		plus end		cortical		plus end		cortical		plus end		cortical		plus end		cortical		plus end		cortical		plus end		cortical		plus end		cortical		plus end		cortical		plus end		cortical
N = 1	N = 2	N = 1	N = 2	N = 1	N = 2	N = 1	N = 2	N = 1	N = 2	N = 1	N = 2	N = 1	N = 2	N = 1	N = 2	N = 1	N = 2	N = 1	N = 2	N = 1	N = 2	N = 1	N = 2	N = 1	N = 2	N = 1	N = 2	N = 1	N = 2	N = 1	N = 2	N = 1	N = 2	N = 1	N = 2	N = 1	N = 2	N = 1	N = 2	N = 1	N = 2	N = 1	N = 2	N = 1	N = 2	N = 1	N = 2	N = 1	N = 2
32.58	211.227	51.478	32.262	40.194	120.797	55.435	53.406	103.14	104.113	103.928	35.984	67.793	42.155	217.984	25.605	58.823	105.354	29.713	120.277	106.846	31.054	78.005	45.073	34.374	40.68	44.989	109.411	80.393	50.22	31.205	81.678	65.815	44.821	55.938	19.903	29.287	27.265	34.425	37.661		355.724	41.434	25.706	28.087	19.367	30.317	85.182	74.467	37.058
99.904	35.397	37.879	24.18	21.798	64.255	57.665	58.269	99.367	67.224	98.999	19.317	166.473	190.569	99.552	45.927	69.99	114.777	62.226	111.927	83.622	62.159	44.285	25.789	139.124	33.016	47.353	81.795	35.934	55.318	21.212	44.536	119.371	26.175	44.72	29.21	44.284	26.628	34.206	32.715			37.527	19.031	77.502	27.617	39.12	49.935	105.236	28.338
55.821	36.571	31.725	43.848	46.649	32.362	86.071	107.132	108.003	45.023	100.592	49.718	40.243	39.472	23.978	167.127	37.226	112.966	120.797	124.335	56.425	59.141	66.049	94.756	49.147	36.37	22.368	65.043	107.702	55.217	23.979	122.96		27.433	78.307	25.287	39.187	22.47	37.761	35.045			50.153	30.87	25.605	24.213	56.291	23.928	24.046	44.838
63.819	23.458	92.576	32.697	35.967	120.764	58.688	104.918	97.724	39.975	90.195	32	26.694	241.258	129.651	56.073	36.706	108.791	88.301	121.971	51.008	32.631	57.28	20.831	46.145	146.704	36.286	34.206	565.067	47.957	149.689	69.721		26.494	24.733	23.324	32.664	45.223	40.596	36.052			26.293	42.491	27.919		64.406	37.778	46.984	162.113
57.799	32.279	105.605	24.716	58.752	52.45	28.07	59.107	93.884	63.182	90.413	99.434	75.507	26.963	224.357	33.838	26.93	96.903	46.581	99.653	212.452		64.171	103.14	33.754	229.253	29.394	52.668	59.577		21.647	29.008		59.829	28.037	35.146	37.041	32.597	29.411	37.745			35.264	94.74			39.757	31.54	41.702	72.707
31.742	34.961	56.525	159.196	38.566	39.187	63.936	50.455		85.617	106.813	54.144	54.345	34.928	171.286	47.721	86.607	115.867	49.717	114.375	70.157		29.428	29.797	45.995	66.771	63.434	34.475	29.847		44.519	23.844		61.371	20.206	49.684	35.112	22.621	33.788	58.018			23.223	169.39			40.73	24.029	16.701	104.85
30.652		65.127	21.564		74.802	37.343	55.754		149.252	94.79	70.409	41.333	282.441	47.118	34.207	20.893	107.936	43.111	107.064	61.975		69.101	23.743		57.447	22.201	27.584	29.898		38.517	76.748			33.804	36.706	82.147	27.533	44.703	56.743			22.688	23.09			51.914	24.113		89.172
40.847		26.795	38.634		46.933	41.401	30.166		37.527	97.054	38.08	70.912	37.057	84.696	33.788	52.618	120.864	49.868	103.241	30.534		104.884	88.988		68.329	20.943	28.489	62.26		46.011	59.174			77.083	22.72	48.258		20.507	28.237			62	60.683			44.838	34.726		83.622
115.18		59.644	32.363		230.947	81.962	116.22		68.213	114.677	46.314	115.045	32.697	93.13	57.246	35.347	107.886	44.251	101.598	32.865		36.169	48.041		58.235	28.439	70.912			34.861	130.422			33.67	49.667	39.405		34.29	25.773			18.579	69.403			32.949	53.826		24.98
		86.322	27.416		37.108	67.827	94.186		46.749	99.653	29.898		43.664	63.333	35.062	67.139	111.055	40.344	118.852			52.434	70.896		33.938	64.256	31.574			88.351	41.635			60.298	24.431	65.446		68.967	43.312				20.558			38.868	44.016
		60.231	45.324		33.067	58.52	42.49		129.483	95.058	42.641		22.364	24.968	20.591			80.219	101.916			120.11	61.237		71.817	123.53	41.535			22.201	50.153			37.024	20.339	18.412		141.104	75.222				160.923			40.528	37.577
		31.809	41.736		170.682	35.532	30.685		60.097	95.897	39.321			152.069	30.317			81.302	106.896			40.109	36.387		31.591	69.554	49.08			21.111	35.749			48.627	34.056	28.674		39.841	31.759				23.693			21.044	31.055
		21.446	36.839			61.354	87.311		60.382	97.875	66.905			61.941	43.212			35.884	123.799			49.7	72.438		80.219	32.162	111.625			47.403	26.158			53.138	65.261			20.558	31.289				32.379			30.602	32.329
		55.335	22.284			36.118	71.348		49.952	90.195	108.472			64.641	65.814			82.549	108.992			50.271	75.573		53.154	47.688	46.012			28.472	32.631			72.488	56.86			25.655	47.755				41.752			23.794	49.651
		41.367	87.362			24.733	29.512		35.548	125.626	36.974			36.789	24.129			29.495	109.395			57.732	24.716		35.297	46.213	41.032			33.888	19.719			44.301	25.839			33.371	39.086				22.906			69.269	21.647
		70.778	73.897			37.477	34.525		147.308	105.387	61.27			100.072	24.851			78.558	106.913			82.163	17.858		23.039	31.826	22.335			57.095	64.071			28.254	41.384			38.818	56.442				25.622			23.391	54.898
		89.021	101.557			35.38	25.404		33.588	106.628	70.124			70.56	28.757			48.877	112.011			92.158	71.012		28.908	40.696	58.269			52.081	34.207			63.484				43.228	27.299				24.716			59.611	40.394
		52.601	34.039			42.289	57.028		34.677	98.076	44.787			29.981	45.223			33.888	107.668			39.154	28.371		42.373	90.296	54.781			42.607	28.774			39.673				31.423	21.211				34.944			56.978	30.534
		25.234	37.645			34.308	41.987			99.15	44			30.299	33.033			46.632	112.43			65.345	23.056			50.824	67.156			47.756	63.467			45.073				28.556	24.817				47.772			25.755	71.047
		55.033	26.795			45.609	32.078			97.137	37.325			80.94	29.881			33.284	104.582			71.633	94.79				37.242			19.518	49.164			35.917				30.619	49.985							29.83	26.979
		99.435	42.759			37.812	39.405			104.499	59.927			56.324	28.019			34.66	112.748			33.134	75.489				46.984			47.068	13.851			42.776				61.874	17.07							34.056	33.201
		39.623	51.294			22.687	34.173			96.651	39.087			44.754	26.393			31.389	116.89			57.448	22.1				77.703			53.423	66.552			47.705				41.619	37.141							49.5	39.254
		45.458	36.94			30.669	53.339			96.886	21.127			190.284	75.373			37.779	108.556			81.006	31.004				63.584			28.238	136.257			43.916				86.272	24.347							67.693	21.027
		84.762	126.33			74.433	27.969			96.735	36.303			137.112	78.977			67.592	99.82			85.014	64.289				31.658			32.345	87.831			72.371				52.082	63.584							30.988	30.736
		91.369	44.117				99.033			97.305	33.218			62.226	38.449			37.756	123.245			87.864	52.635				68.079			34.358	22.603			34.006				60.684	39.992							58.571	23.828
		61.237	38.215				78.139			96.182	30.887			34.327	25.924			55.519	121.988			55.385	60.164							34.575	36.42			42.323				41.384	26.527							29.696	26.493
		34.207	69.974				30.081			97.339	23			43.362	27.131			122.675	102.386			57.346	23.928							28.539	55.586			95.259				111.457	34.274							25.303	20.34
		103.392	49.164				58.571			97.171	55.821			59.09	22.134			31.524	111.927			39.154	18.059							83.204				31.021				83.774	49.7							46.247	32.229
		36.84	31.172				30.535			101.832	34.727			49.902	67.559			44.939	105.186			24.179								50.807				35.632				62.763	18.814							55.485	33.788
		93.835	20.188				74.333			100.089	64.423			42.138	35.851			36.655	92.023			84.712								21.245				36.655				25.185	39.354							120.781	46.682
		37.342	23.106				95.192			96.299	22.067			58.018	35.414			60.096	123.899			35.867								67.877								38.382	21.162							43.58	22.453
		42.49	38.869				43.664			94.454	115.967			54.731	40.093			34.039	108.841			67.357								39.17								37.863	39.992							63.249	27.013
		63.25	40.494				26.276			99.015	43.362			43.396	115.146			36.085	113.319			40.21								50.64									26.694							51.343	54.311
			39.321				35.062			91.973	46.951			22.435	32.396			45.391	96.198			45.542								23.995									64.288							46.481	88.754
							71.667			96.601	126			58.47	40.076			23.241	96.031			31.004								43.01									36.354							44.62	21.413
							60.918			93.75	75.013			46.481	41.518				101.531																				21.966							23.072	37.694
							24.448			95.645	28.516			86.989	28.238				114.962																				56.223							33.251	30.77
							86.423			94.89	46.947			39.824	183.778				106.578																				24.749							30.233	24.28
							65.865			96.953	32.43			34.805	86.775				102.185																				45.424							95.612	20.491
							41.736			101.648	93.214			38.315	88.552																								18.445							23.794
											101.849			118.164	48.577																								50.539							21.43
											52.568			61.606	40.981																								29.646
											162.885			46.766	84.176																								48.795
											91.235			29.478	49.784
											51.545			85.584	32.999
											64.289				50.589
											40.093				88.367
											113.839				88.452
											43.715				31.256
											29.327				28.086
											176.45				27.316
											43.564				45.928
											88.485				26.36
											195.583				41.383
											35.867				25.756
											106.662				48.845
											154.669				69.336
											61.069
											43.781
[truncated: 10 more columns]
