# Supplementary material for: Molecular basis for dyneinopathies reveals insight into dynein regulation and dysfunction
Source: eLife. 2019 Jul 31;8:e47246. doi: 10.7554/eLife.47246 (PMC6733598; doi:10.7554/eLife.47246)
Supplement: Figure 6—source data 1. [file elife-47246-fig6-data1.xlsx]

## Sheet: # dynein events per min
	# of events	n (total time)	mean # per min (n = 1)	SEP	# of events	n (total time)	mean # per min (n = 2)	SEP	weighted average events per min	SD	Z score for H3639P	p value for variance from H3639P
WT	see Figure 2, Source Data 1								0.646025	0.0376148
H3639P	see Figure 2, Source Data 1								0.023399	0.0129229
F3638G H3639P W3640G	21	125.667	0.16712	0.0332809	17	154.667	0.109915	0.0251504	0.135558	0.0287951	2.60493	0.0091893

## Sheet: total spindle displ per min
	∑D for n =1	∑D for n =2	average total displacement (µm)	SEM	p value from t-test (from H3639P)
WT	see Figure 2, Source Data 1		0.865751	0.0738011
H3639P	see Figure 2, Source Data 1		0.00841494	0.00521049
F3638G H3639P W3640G	0.095028	0.0503964	0.0727122	0.0223158	0.036
