# Supplementary material for: Molecular basis for dyneinopathies reveals insight into dynein regulation and dysfunction
Source: eLife. 2019 Jul 31;8:e47246. doi: 10.7554/eLife.47246 (PMC6733598; doi:10.7554/eLife.47246)
Supplement: Figure 6—source data 2. [file elife-47246-fig6-data2.xlsx]

## Sheet: localization frequency MG132
										plus end				SPB				cortical
genotype/treatment	# of cells w/ plus end foci (n1)	# of cells w/ cortical foci (n1)	# of cells w/ SPB foci (n1)	# of cells (n1)	# of cells w/ plus end foci (n2)	# of cells w/ cortical foci (n2)	# of cells w/ SPB foci (n2)	# of cells (n2)	TOTAL N	% cells with plus end foci	SD	Z score	p value from Z score	% cells with SPB foci	SD	Z score	p value from Z score	% cells with cortical foci	SD	Z score	p value from Z score
WT + DMSO	35	8	2	46	33	10	2	45	91	0.747253	0.0455571	-	-	0.043956	0.0214896	-	-	0.197802	0.0417576	-	-
WT + MG132	32	22	4	49	46	22	2	58	107	0.728972	0.0429705	-0.2913*	0.7715	0.0560748	0.0222413	0.3881*	0.692	0.411215	0.0475687	3.2270*	0.00125
H3639P + DMSO	6	1	11	36	8	2	17	54	90	0.155556	0.0382038	-7.9957**	<0.00001	0.311111	0.048799	4.7106**	2.4e-06	0.0333333	0.0189215	-3.4545**	0.0005511
H3639P + MG132	29	2	12	45	20	1	18	40	85	0.576471	0.0535946	5.7978***	1e-05	0.352941	0.0518339	0.5875***	0.533	0.0352941	0.0200142	0.07557***	0.9379
												*WT + MG132 compared to WT + DMSO
												**H3639P + DMSO compared to WT + DMSO
												***H3639P + MG132 compared to H3639 + DMSO
