# Supplementary material for: Molecular basis for dyneinopathies reveals insight into dynein regulation and dysfunction
Source: eLife. 2019 Jul 31;8:e47246. doi: 10.7554/eLife.47246 (PMC6733598; doi:10.7554/eLife.47246)
Supplement: Figure 7—source data 1. [file elife-47246-fig7-data1.xlsx]

## Sheet: spindle vel (nm per s)
C1822S	C1822S R1852C	R1852V	C1822S R1852V	C1822A R1852C
44.7437	54.8515	11.8467	49.4859	31.3527
38.4005	47	36.9917	31.0875	47.1035
24.1757	46.389	61.4628	38.045	15.83
46.284	46.3848	32.422	25.4143	23.0851
28.2747	46.2483	39.3473	28.5925	33.3333
25.5975	46.0078	35.1121	38.403	12.1771
40.4459	45.6773	17.3289	28.0172	12.5522
18.7823	44.6234	17.8187	10.5159	17.3018
27.2738	43.6213	38.0902	21.3205	25.4959
27.4325	43.4477	39.9944	34.6531	19.2694
24.8001	41.0949	29.601	27.2901	21.766
53.8226	40.6775	24.0513	26.0991	13.2426
31.7369	40.0878	27.8282	44.5933	23.6477
34.6095	40.0793	15.3926	18.5415	21.7056
23.8599	39.0677	6.59696	33.8317	19.9624
30.1505	39	13.6442	36.7365	22.0282
45.0441	39	13.6636	8.18544	18.4789
41.998	36.9631	13.6385	13.3992	17.4276
37.5217	36.2964	38.4617	30.7668	25.6588
52.2309	36.0996	46.1621	33.4636	24.4806
30.0538	35.3816	12.5459	27.8757	22.1979
17.547	35.3306	41.4684	27.1477	12.7273
20.729	35	37.8997	13.46	18.5
16.016	34.7988	47.2998	20.4292	65.4211
19.9069	32.2099	30.5858	30.5153	10.7792
39.8581	32	26.9257	46.8504	29.708
40.9723	32	16.9321	25.473	12.7241
36.0269	31.2515	24.7382	24.5368	18.7803
46.6154	30.2894	13.1952	10.1913	7.30465
18.3185	30.0484	15.2907	18.2504	15.6978
26.5393	30	38.9127	18.096	14.038
15.5855	29.6788	34.0392	27.0829	15.8739
32.4191	29.6534	23.7247	27.3558	19.1737
18.7602	29.0657	14.3927	29.0294	22.6085
46.8852	29	32.4923	27.4066	17.2725
35.2415	28.8794	44.3745	21.0078	13.1491
55.9255	28.8665	30.9102	21.5297	19.8181
17.7198	27.9198	23.8799	16.937	28.0898
31.9122	27.8979	53.2236	21.6456	17.4629
22.5397	27.8769	38.6263	31.4382	23.6501
40.2712	26.6289	23.9779	98.1342	21.6898
9.4559	26.6289	18.4375	52.6984	24.05
56.4103	26.585	37.5025	25.8745	21.7296
40.6189	26	25.9965	34.2136	26.7412
24.406	25.0463	29.7897	25.0091	26.7069
19.6116	25	27.682	34.0971	14.7966
20.9962	24.6895	34.1353	40.9576	15.7816
33.2855	24.4117	30.5242	24.8849	19.374
28.5927	23.3	23.3417	36.5035	28.1982
39.138	22.8635	53.7008	43.441	33.3406
27.1492	22.5243	27.1825	14.7987	19.3891
76.0221	22	27.5647	36.0555	16.5004
26.5403	21.7805	23.5813	27.6703	27.7245
8.66667	21.4745	38.0295	45.165	25.245
38.5728	20.6327	19.4784	23.3022	14.5924
38.8514	20.6085	30.3849	28.5511	18.2375
39.7649	20	9.09969	44.0575	18.2664
28.524	19.9405	37.433	22.0537	44.5327
53.0361	19.3885	29.7696	22.9136	22.5404
31.138	19.3416	53.3892	15.6379	16.5645
23.3479	17.4944	21.7226	23.3199	22.0805
45.9352	16.6294	19.1755	20.547	23.5119
12.1824	16.5045	31.6792	8.55388	23.9576
21.4526	15.2025	36.577	32.2529	15.8461
32.8175	15	28.2978	46.8235	25.8933
23.2261	14.009	25.2369	18.3989	12.5684
57.0293	13.3698	37.0282	46.0035	29.8
32.3921	13	8.80927	16.6836	32.8667
35.2306	12.2825	44.6171	14.0037	37.625
24.7152	12.1319	50.426	19.3196	23.7625
39.767	10.2013	36.5528	17.4898	17.4976
36.2576	21.8637	62.0341	11.3585	28.8711
24.4073	31.0937	36.6995	25.3815	28.9076
26.6689	29.4454	26.8113	28.2904	29.9565
58.4251	37.9032	27.0175	18.0201	25.8316
31.0147	43.3367	10.3441	14.9306	26.7052
38.4127	51.7684	18.4956	10.5708	33.4357
29.054	19.563	25.8725	17.2287	22.2764
33.0026	27.6724	32.3633	64.7937	39.2586
29.9104	19.6484	43.2322	29.8593	37.4334
23.1335	16.9439	8.57768	21.3167	14.9983
20.4477	26.2332	26.3795	27.7072	31.3611
51.2188	24.6506	17.5618	27.8319	25.7807
9.44437	31.4834	17.4342	44.869	18.8556
33.7334	20.9576	24.0888	49.8359	25.9164
22.4986	31.0588	19.4636	28.444	15.0927
34.7851	34.5539	35.5016	14.5333	32.8862
38.6798	16.3237	35.724	30.4244	29.3397
43.621	23.9278	15.8833	35.2097	22.132
30.18	7.98995	32.0481		17.2048
24.5397	11.953	43.3378		20.7971
29.6456	17.6724	21.6959		49.2651
36.6159	28.3251	24.3589		18.7231
56.1088	17.5231	17.2358		22.2526
37.5492	19.7698	29.3179		30.7256
25.2102	28.7545	8.4099		33.8891
44.1786	26.8917	40.8825		20.6647
40.9429	46.4403	29.7083		13.2138
14.751	12.035	28.6314		32.1985
41.5327	19.8118	17.4717		30.9836
13.0248	14.1465	18.2086		17.9366
21.3401	12.0861	26.0757		25.2044
38.9517	19.0892	42.9509
47.5185	22.4462	15.4029
26.5512	28.0127	25.2356
37.6158	13.0881	40.306
17.4464	22.7054	78.5125
20.6616	17.0006	35.9865
60.631	18.432	18.9293
21.4957	24.2516	44.0273
19.7376	27.4261	20.6041
29.9077	28.9868	60.3338
27.0916	21.5112	9.80636
25.1577	13.918	36.6271
25.4464	39.6409	5.55501
55.4236	20.105	19.5608
31.3247	22.1058	39.1824
21.3947	20.5634	27.0508
14.5584	27.2085	27.089
7.37601	22.512	2.06806
61.1319	19.2394	26.6866
21.4273	24.5328	32.7466
45.1403	24.979	26.9669
21.4029	29.1557	24.7257
43.9738	17.5932	30.8882
21.6336	19.1147	20.1511
29.2489	13.0718	23.8515
45.7128	9.78166	21.5889
18.2445	13.6712	39.2787
22.0809	23.194	45.7894
32.9471	15.7198	26.1549
36.3118	12.2862	17.3447
28.7015	20.7477	30.725
29.7023	31.072	12.9709
19.6217	28.0008	24.0252
41.2344	22.1591	49.9653
59.3569	36.5949	24.1512
22.4324	26.6045	42.7233
28.8446	24.278	18.6474
25.3465	22.8562	21.6964
17.8393	31.8661	29.3807
33.7661	33.3716	22.2418
32.5617	19.8733	33.3384
54.1961	17.8365	44.2205
37.116	18.9085	27.8356
45.9125	12.263	21.843
27.7139	25.0309	53.2689
41.0271	38.21	28.7244
	24.829	32.2429
	28.9498	38.1405
	11.1706	11.1361
	54.106	21.438
	19.3024	22.9182
	15.997	46.1424
	25.5086	35.4672
	41.16	23.7917
	25.686	26.0824
	9.77951	25.515
	18.8501	20.557
	15.3101	16.7418
	19.7275	13.3586
	24.3626	17.8252
	23.0264	10.2706
		38.6606

## Sheet: spindle displacement (µm)
C1822S	C1822S R1852C	R1852V	C1822S R1852V	C1822A R1852C
1.34231	1.64555	0.355402	0.989717	1.25411
1.15201	0.47	0.739833	1.86525	0.471035
0.483514	1.39167	3.68777	3.42405	0.316599
1.38852	2.78309	0.32422	1.27072	1.15426
0.282747	1.38745	0.393473	2.57332	1
0.255975	1.84031	1.7556	0.76806	0.608854
2.42675	2.74064	0.173289	2.52155	0.251044
0.187823	1.78493	0.356374	0.210319	0.346035
0.818215	1.89883	2.66631	1.70564	0.254959
0.822975	3.47581	0.799889	1.38612	0.963471
0.744004	0.82	0.29601	2.18321	0.21766
1.61468	1.6271	0.481026	1.30496	0.397278
0.634738	1.6	0.556565	0.891866	0.709432
1.03828	0.801587	0.307851	0.927076	0.217056
0.477199	0.78	0.131939	0.676635	2.19587
0.301505	0.39	0.272883	0.734729	0.440564
0.900882	0.39	0.273272	0.0818544	0.923943
0.41998	0.74	0.409154	0.535968	0.522828
1.12565	3.62964	1.53847	0.923003	0.256588
0.522309	0.360996	0.923241	0.334636	0.734419
1.20215	1.06145	0.250918	2.23005	2.21979
0.877348	1.4	0.414684	0.542955	0.381818
0.20729	0.35	0.378997	0.1346	1.48
0.16016	0.7	1.41899	1.22575	1.30842
0.597207	0.644198	0.917573	1.83092	0.215585
1.19574	0.32	1.07703	0.468504	0.891239
0.819447	0.32	1.18525	1.01892	0.890688
1.44108	2.50012	1.97906	1.71758	0.375606
1.86462	0.605787	0.263903	0.305738	0.073046
0.366369	1.20193	0.611628	0.182504	0.470935
0.530785	0.3	3.50214	0.361921	0.42114
0.31171	0.890363	0.680784	0.812487	0.793695
0.972572	0.593068	0.948988	0.820675	3.25952
0.375204	1.74394	0.287855	1.45147	0.45217
2.34426	0.29	1.94954	0.274066	0.518176
0.352415	1.15517	1.77498	0.210078	0.262982
0.559255	0.57733	3.40012	0.64589	0.396362
0.708791	1.11679	1.4328	0.338741	0.280898
0.957367	0.557959	1.06447	0.865823	0.698515
0.225397	0.836307	0.386263	0.628764	0.709501
0.402712	1.59773	0.479559	2.94403	1.30139
0.189118	1.59773	0.737499	3.1619	0.481
1.12821	1.32925	3.37523	1.55247	0.434592
1.21857	0.26	0.259965	0.684273	0.534823
1.46436	0.5	0.893692	0.500181	0.801208
0.392233	0.25	0.27682	2.04583	0.443898
0.419925	1.23448	0.341353	0.409576	0.315633
0.998564	0.976468	0.915727	2.48849	0.387481
1.42963	0.23	0.700251	0.365035	1.40991
1.56552	0.685905	2.68504	0.43441	0.666811
1.35746	0.675729	0.815476	0.44396	0.581673
1.52044	0.22	1.92953	1.08166	0.330007
0.530806	0.653416	1.8865	0.553407	0.277245
0.26	0.429489	1.52118	0.903301	0.5049
0.771457	0.618981	0.584351	0.932088	0.291848
1.55406	0.41217	0.607699	3.71164	0.547124
3.18119	0.2	0.0909969	3.5246	1.46131
0.85572	0.398811	0.37433	0.220537	1.33598
4.24289	0.969427	0.595391	0.458271	0.450808
0.93414	0.773666	1.06778	0.469138	0.496936
0.933914	0.349889	0.868903	0.699597	0.88322
0.459352	0.665176	0.383511	0.61641	0.470239
0.243649	1.15532	0.316792	0.171078	0.479153
0.214526	0.30405	0.36577	1.61265	0.475383
0.65635	0.15	1.41489	0.468235	0.258933
0.464522	0.280181	0.504738	0.735955	0.251368
1.14059	0.668491	0.370282	2.30018	1.49
0.971764	0.13	0.352371	0.500509	0.986
0.704612	0.36	1.33851	0.280073	1.505
0.494304	0.242639	0.50426	0.579588	2.37624
0.39767	0.2	2.19317	0.174898	0.174976
2.17546	1.7491	1.86102	0.113585	0.288711
1.22036	0.621873	2.20197	0.507631	0.578151
1.33345	1.47227	0.268113	0.282904	0.599131
2.92126	0.379032	0.540351	0.360402	1.29158
0.310147	0.433367	0.103441	0.149306	0.534104
0.768254	0.517684	0.369912	0.105708	0.668713
0.581081	0.58689	0.258725	0.344574	0.222764
0.330026	0.553448	2.58907	0.647937	0.785172
0.897313	0.589452	2.59393	1.49296	0.374334
0.694005	0.338878	0.25733	0.213167	0.149983
0.204477	0.786996	1.05518	0.277072	1.56805
1.02438	0.493011	0.175618	0.834956	0.515615
0.0944437	1.57417	0.523026	1.34607	0.754222
1.012	0.838303	0.963554	0.498359	0.259164
0.674959	0.621175	1.16782	0.853321	0.45278
0.695702	0.345539	0.710032	0.581331	0.328862
0.773597	0.652946	1.42896	0.608489	1.46698
2.18105	0.95711	0.953	0.704194	0.66396
0.905401	0.159799	0.320481		0.516144
0.245397	0.11953	0.433378		1.03985
1.18582	0.176724	0.867837		2.95591
1.09848	0.849753	0.730768		2.434
0.561088	0.175231	0.344716		0.222527
1.12648	0.593093	0.879536		1.84354
0.504204	0.57509	0.168198		0.677782
0.883573	1.34459	0.408825		0.206647
2.45657	0.464403	1.18833		0.132138
0.14751	0.240701	1.14526		0.643971
2.07663	0.792473	0.174717		0.929508
0.130248	0.28293	0.546258		1.07619
0.640202	0.120861	0.521514		0.504088
0.779034	0.381784	3.00657
0.95037	0.224462	0.616117
1.59307	0.840381	0.757067
0.752316	0.261762	2.0153
0.697857	0.454108	0.785125
0.619849	0.510017	0.719731
1.21262	0.18432	0.189293
0.214957	0.242516	1.32082
0.197376	0.274261	1.64833
0.897231	0.289868	0.603338
0.541832	1.29067	0.0980636
0.75473	0.13918	1.09881
0.254464	1.18923	0.16665
1.66271	0.402099	0.195608
1.25299	0.442115	1.95912
1.92553	0.411268	1.08203
0.291168	0.816256	0.541781
0.14752	0.675359	0.0206806
3.66791	0.769576	0.800598
0.64282	0.245328	1.30986
2.25701	0.499579	0.539338
0.428059	0.291557	0.989028
2.63843	0.527797	0.308882
1.08168	0.191147	0.403022
0.584978	0.130718	0.238515
0.457128	0.0978166	0.215889
0.364889	0.273423	1.96393
0.662427	1.85552	0.457894
1.64736	0.157198	0.784647
0.726236	0.368586	0.346894
0.287015	0.207477	0.921749
1.78214	0.62144	0.259418
0.784868	0.840024	0.961009
2.06172	0.221591	3.49757
2.96785	1.09785	1.20756
0.897297	0.53209	0.427233
0.576893	0.24278	0.186474
0.253465	0.228562	0.433928
0.356785	0.637323	0.881422
1.01298	0.667431	0.667255
0.325617	0.596198	0.333384
4.33569	0.178365	1.32661
0.742321	0.37817	1.94849
2.75475	0.367889	0.43686
1.10856	0.250309	2.66344
0.820542	1.1463	0.287244
	0.24829	0.967286
	2.60548	0.762811
	0.223412	0.222722
	0.54106	0.428761
	0.579072	1.14591
	0.15997	3.22997
	2.55086	1.06402
	1.2348	0.475835
	0.51372	1.0433
	0.19559	0.765451
	0.377002	0.41114
	0.306201	0.502253
	1.97275	0.267172
	0.974504	0.534757
	0.460529	0.205412
		1.15982

## Sheet: # dynein events per min
	# of events	n (total time)	mean # per min (n = 1)	SEP	# of events	n (total time)	mean # per min (n = 2)	SEP	weighted average events per min	SD	Z score for WT	Z score for 1852C	Z score for 1822S/R1852C vs C1822A/R1852C	p value for 1822S/R1852C vs C1822A/R1852C	p value for variance from WT	p value for variance from R1852C	p value for 1822S vs 1822S/1852C	p value for 1852V vs 1822S/1852V
WT	see Figure 2, Source Data 1								0.646025	0.0376148	-	0.425525	-4.0856	4.4e-05	-	< 0.0001	0.134175	0.381966
C1822S	78	145	0.537931	0.0414031	71	135.333	0.524631	0.0429279	0.53151	0.0421392	0.603449	0.325123			0.0018927	< 0.0001
R1852C	see Figure 2, Source Data 1								0.200431	0.032061	0.425525	-			< 0.0001	-
C1822S R1852C	74	135.333	0.546798	0.0427914	87	135.333	0.642857	0.0411885	0.594828	0.04199	0.627408	0.345735			0.164611	< 0.0001
R1852V	79	135.333	0.583744	0.042373	82	145	0.565517	0.0411647	0.574316	0.041748	0.619364	0.341245			0.0500063	< 0.0001
C1822S R1852V	90	145	0.62069	0.0402949	66	145	0.455172	0.0413555	0.537931	0.0408252	0.604977	0.330239			0.0030213	< 0.0001
C1822A R1852C	38	135.333	0.421182	0.0424428	64	145	0.42069	0.040997	0.420927	0.041695	0.541115	0.261979				4.8e-06

## Sheet: Neck transit values
	successful crosses	total attempts	fraction (for n = 1)	SEP (for n = 1)	successful crosses	total attempts	fraction (for n = 2)	SEP (for n = 2)	TOTAL N	weighted mean of neck transit (%)	SD	Z score for WT	Z score for 1852C	Z score for 1822S vs 1822S/1852C	Z score for 1852V vs 1822S/1852V	Z score for C1822S/R1852C vs C1822A/R1852C	p value for variance from WT	p value for variance from 1852C	p value for 1822S vs 1822S/1852C	p value for 1852V vs 1822S/1852V	p value for C1822S/R1852C vs C1822A/R1852C
WT	see Figure 2, Source Data 1									0.608696	0.0709031	-	6.02729	-1.55955	-0.45272	-0.101167	-	1.61205e-09	0.118865	0.65075	0.919392
C1822S	13	31	0.419355	0.0886269	17	33	0.515152	0.0869989	64	0.46875	0.0877874	-1.86625	4.11943				0.0620058	3.8e-05
R1852C	see Figure 2, Source Data 1									0.104167	0.0736022	-6.02729	-				1.61205e-09	-
C1822S R1852C	9	38	0.236842	0.0689676	19	44	0.431818	0.0746737	82	0.341463	0.0720294	-3.83377	3.00019				0.0001262	0.0026981
R1852V	18	41	0.439024	0.077504	16	42	0.380952	0.0749329	83	0.409639	0.076203	-2.87272	3.68418				0.0040696	0.0002294
C1822S R1852V	13	35	0.371429	0.0816735	17	45	0.377778	0.0722744	80	0.375	0.0763865	-3.32962	3.32811				0.0008696	0.0008743
C1822A R1852C	9	31	0.290323	0.0815249	11	29	0.37931	0.0901022	60	0.333333	0.0856706	-3.56592	2.80576				0.0003626	0.0050198

## Sheet: total spindle displ per min
	∑D for n =1	∑D for n =2	average total displacement (µm)	SEM	p value from t-test (from WT)	p value from t-test (from R1852C)	p value from t-test (from R1852V)	p value from t-test (from R1822S)	p value from t-test (from R1822S/R1852C)
WT	see Figure 2, Source Data 1		0.865751	0.0738011	-	0.0038
C1822S	0.563221	0.493192	0.528206	0.0350145	0.0308
R1852C	see Figure 2, Source Data 1		0.087591	0.0302355	0.0038	-
C1822S R1852C	0.492455	0.406442	0.449449	0.0430067		0.0211		0.295
R1852V	0.625988	0.523571	0.57478	0.0512086		0.0227
C1822S R1852V	0.685691	0.353041	0.519366	0.166325			0.795
C1822A R1852C	0.327735	0.339966	0.333851	0.00611546		0.0124			0.222

## Sheet: p values
	velocity	displacement per event	# events/min	neck transit success	total spindle displacement
C1822S*	<0.0001	0.0024	see individual tabs for detailed pairwise t-test data
C1822S R1852C**	0.0004	0.0014
C1822A R1852C**	0.1062	0.0003
R1852V*	<0.0001	<0.0001
C1822S R1852V***	0.882	0.6711
	(against WT*; against R1852C**; against R1852V***)
